# Supplementary material for: TWIST1 and chromatin regulatory proteins interact to guide neural crest cell differentiation
Source: eLife. 2021 Feb 8;10:e62873. doi: 10.7554/eLife.62873 (PMC7968925; doi:10.7554/eLife.62873)
Supplement: Figure 7—source data 1. — Expression of 91 marker genes on days 0, 3, 12 of neural differentiation for wildtype, single-gene heterozygous (average of Twist1+/-, Chd7+/-, Chd8+/- and Whsc1+/-) or compound heterozygous (average of Twist1+/-;Chd7+/-, Twist1+/-;Chd8+/- and Twist1+/-;Whsc1+/-) groups. For NCCs, samples were collected O9-1 cells with siRNA knockdown of single-gene or combinations of Twist1 and one of the partners. Gene expression were normalized against the mean expression value of three housekeeping genes (Gapdh, Tbp, Actb), and then the expression of day 0 wild-type ESCs. [file elife-62873-fig7-data1.csv]

Sample	LOF_type	Day	Ctnna2	Jag1	Zic1	Six4	Jam2	Spock1	Meis1	Ephb2	Pou5F1	Sox17	Tgfbr2	Spp1	Activin A	Itga9	Pdgfra	Pias3	Epha3	Muc1	Fn1	Pou4f1	Nanog	Mesp1	Cdh2	Id2	Ctgf	Flk1	Cltc	Gli3	Tfap2A	Id1	Boc	Sox2	Mixl1	Pcolce	Cd56	Vcan	Gsc	Plk3	Sox10	Pax6	Insm1	Chd7	Klf4	Thy1	Snail2	Nestin	Pdgfc
Twist1+/-;Whsc1+/-ist1+/-_3	Single	0	58.69302072	1.106021952	0.618092364	0.854293015	0.610653407	0.308150396	0.938901915	0.967041799	0.559451939	1.366597833	0.939019832	0.576406084	0.74310233	0.788263347	1.325203465	0.903834265	3238.485503	0.268586091	1.191041756	0.934070043	0.791894067	3.333394934	1.499654011	0.650989877	2.6389154	1.246211559	1.060024243	0.894567579	1.223540157	0.217209708	0.611196525	1.16444803	0.737029901	0.571660103	0.624450293	1.686059847	89.95793064	0.946279331	0.536089769	2338.906197	0.379205909	0.925099795	0.843861269	0.890011877	1.188574249	0.515222232	0.750342155
Twist1+/-;Whsc1+/-ist1+/-;Chd8+/-_3	Compound	0	45.66551878	1.104024446	0.439296576	1.298634328	1.498349821	0.431777168	0.563599281	0.783343275	0.644191482	3.312827945	1.291804981	0.787771611	1.074003329	1.421220515	1.459191538	0.769644135	7687.189988	0.190388642	1.313924037	1.133831262	1.112255956	1.964425972	1.679022824	0.696620035	0.945027036	2.93873202	1.107868904	0.955100485	2.066030144	0.253051579	0.523729895	0.806632427	1.15241866	0.639233321	0.812321215	1.587871164	89.3859301	0.980306316	1.02034675	1340.788951	0.320108784	1.27211088	1.153959477	1.08165233	1.127897057	0.60066518	0.535235919
Twist1+/-;Whsc1+/-_3	Compound	0	10.20915147	1.01325482	0.292580803	1.283664518	1.469309486	0.119039513	0.575629718	0.920447337	0.839509255	2.132666072	0.992689284	0.831800133	1.643897831	1.001820966	0.74511134	0.764720492	4825.094248	0.201686996	1.164810208	1.206118018	1.013564825	2.155196101	1.383638745	0.706837424	0.530040345	1.955207192	1.355039684	0.914176522	1.91091292	0.275321308	0.48726471	0.898064827	1.034711298	0.785934789	0.896379575	1.43729549	150.7841953	1.143419336	0.476708313	2563.33132	0.618736453	1.186793142	1.201557834	1.41792668	1.511710273	0.779149425	0.973457177
Wildtype_3	WT	0	1	1	1	1	1	1	1	1	1	1	1	1	1	1	1	1	1	1	1	1	1	1	1	1	1	1	1	1	1	1	1	1	1	1	1	1	1	1	1	1	1	1	1	1	1	1	1
Twist1+/-;Whsc1+/-ist1+/-;Chd7+/-_3	Compound	0	72.6057971	0.360931378	0.660867069	1.300738197	2.455261378	0.191965974	0.887751634	0.522868005	0.902334144	1.489135574	4.491080233	0.821143033	48.93113995	2.58341707	1.419324648	0.976362878	47077.23043	0.326115076	1.45856604	0.810266789	0.919474626	3.283701326	2.382016571	0.318797712	5.131639423	6.411113688	1.384501162	0.936920028	0.577216716	0.620500766	0.691114563	0.64746575	0.861829221	0.782373845	0.439744243	1.114041239	1	1.059341657	1.052516469	743.8840023	0.455892256	0.910127566	1.707938618	2.230211107	2.602682017	0.369803973	0.975392652
Chd7+/-_3	Single	0	46.58714295	0.201744413	0.854311199	0.749665432	0.776081837	0.576622071	0.689897098	0.514557097	1.075735557	3.661103547	5.49804202	1.422573512	11.63778197	1.180769437	1.296155548	1.036591592	12818.06728	0.933266715	0.959484911	0.900332754	0.635511153	2.556796003	1.142468694	0.394418972	2.151787145	5.426149811	1.136849421	0.984248292	0.370694349	0.844696619	1.125686975	0.527428727	0.477244054	1.714516807	0.424108543	0.560936086	1	0.817006166	1.64626121	1	0.364317833	0.691175682	1.547312595	2.156899731	1.577613314	0.469762683	0.934167295
Whsc1+/-_3	Single	0	22.90617075	0.772161639	1.019081408	1.024943387	0.617345312	1.528521413	0.550222419	0.822619475	0.870742586	1.885891949	1.370674045	0.908775344	1.640339593	0.700921033	0.840842862	0.966036132	10355.31923	1.022469385	1.655918709	1.285275738	1.078873639	1.925000635	0.307252059	0.529356147	2.936564467	2.036989329	0.937634062	0.930582753	1.31649837	0.432951958	1.01459136	1.157780124	1.917819819	1.282629033	0.824814527	0.747743327	1	0.735832297	1.521042168	4530.452164	0.676018741	0.977113576	0.827014354	1.206494158	1.022325562	1.092493513	0.785139966
Chd8+/-_3	Single	0	41.44015736	0.700235918	1.533669239	1.132202939	0.976340726	0.749758808	0.553475328	0.988735389	0.743722774	2.431800586	1.474591565	0.885938655	0.771778881	0.772104121	0.871136743	0.708876094	1	0.710452961	1.531280026	0.852046246	0.905890536	2.103857307	0.899272663	1.267175478	1.277347864	2.022992628	1.089561158	1.160227353	1.380852762	0.618987054	0.805270438	0.680273906	1.594199602	1.160221122	0.949886648	0.83469794	1	0.823607896	0.425338858	5646.663531	1.276016575	1.191359766	0.966780796	0.915672158	1.197684678	0.971530751	0.808736367
Twist1+/-;Whsc1+/-ist1+/-;Chd8+/-_1	Compound	3	4709.856647	0.54013059	18.61148082	1.611404146	0.189364182	0.858242599	11.75628776	12.59261005	0.506353218	1.900139082	2.634184793	0.068829652	0.444725985	0.840774792	0.764681937	0.54016441	399922.9681	0.113008103	0.229274616	1.053594922	0.393189263	1.36048096	26.17422366	6.5654749	2.773736633	18.22798395	0.985846173	6.96873178	5.851939917	3.039827416	0.791964866	0.301816374	4.075496722	0.043816671	0.447816295	1.212713659	1	0.578740148	0.42849096	68515.45235	32.29039142	4.234577155	0.077976582	0.910777775	1.29169233	1.241065993	0.298189885
Twist1+/-;Whsc1+/-ist1+/-;Chd8+/-_3	Compound	3	5040.596863	0.648608205	29.76645893	1.735848761	0.250227478	1.599867008	14.3649476	13.96519253	0.503786397	0.960283688	2.886179503	0.07955228	0.021979581	0.912766234	1.078604255	0.499420301	555636.3416	0.159105986	0.268803392	1.095446034	0.359066336	1.418323464	26.90666159	7.465313893	1.598690069	20.80381176	0.950166279	6.223486466	5.647266179	3.611258972	0.828454401	0.249234801	2.9490938	0.062919171	0.534184117	1.213298147	1	0.568078107	1.291247772	78156.57902	32.46703743	4.066266807	0.101038369	1.047525799	1.922048083	1.100231627	0.35322099
Twist1+/-;Whsc1+/-ist1+/-;Chd8+/-_2	Compound	3	5050.281427	0.675962855	30.2337446	1.579916303	0.195086799	0.955630009	12.70165214	14.10974037	0.472678809	0.716874697	2.287636304	0.063095871	0.131900454	0.839278134	0.847970257	0.453907326	526524.527	0.119023031	0.262393224	1.029195528	0.344624523	1.006977408	28.124154	5.886892773	1.976606844	17.6158814	1.05124118	6.517587979	5.046612685	3.226956039	0.775408917	0.272742786	3.247657317	0.05075246	0.439927971	1.161784358	1	0.595228336	1.141449845	86556.66363	30.86301706	4.249924332	0.074275183	0.945264503	1.491139265	1.17697379	0.287481369
Twist1+/-;Whsc1+/-ist1+/-;Chd7+/-_1	Compound	3	4464.2074	0.441295501	7.382841773	1.359759876	0.073630687	0.382508958	2.274974093	10.55822132	0.851702522	2.584938953	2.874262817	0.047898287	0.040159671	0.733632119	0.745532409	0.545123977	91612.36003	0.207384041	0.177195947	0.635956012	0.535341028	4.453680519	15.19940609	4.366266845	3.523368224	18.83882117	1.11004847	5.761740876	8.13507172	2.272369809	0.418621405	0.171544303	38.00450485	0.062325662	0.344137679	1.234546077	136.1253492	0.673252817	1.359645476	20554.92773	18.35204016	4.5523266	0.044862776	2.014814906	1.437677489	1.635444042	0.365022755
Twist1+/-;Whsc1+/-ist1+/-;Chd7+/-_2	Compound	3	3932.352166	0.493207039	5.21858391	1.367367294	0.068043403	0.54986946	2.415442552	11.89383063	0.754973919	2.490290259	2.947753805	0.048175591	0.193387018	0.678492112	0.679096328	0.498497832	86143.83306	0.163546702	0.168284302	0.833296382	0.475102893	5.261454659	17.00666048	4.119675346	3.119744082	17.38425389	1.190072442	5.976367506	7.849630754	2.763292528	0.467090217	0.168998383	27.36609011	0.065719849	0.360316126	1.299690217	1	0.62862381	1.028327302	32543.22582	14.26804131	4.966131298	0.038423667	1.975792692	1.086142491	1.639726647	0.389723474
Chd7+/-_2	Single	3	3592.351807	0.134006643	1.59E-05	0.966298458	0.084654355	1.34E-05	1.58E-06	17.33808583	0.875084399	29.90857193	1.59E-05	0.061819649	1.34E-05	0.342008818	6.22E-06	0.719848872	1	5.19E-07	0.027378025	2.462442484	0.518892145	22.01324422	9.480821822	1.068123691	7.017196346	16.45193001	1.011911326	4.672056038	10.90141784	0.594925568	0.315135857	0.884645539	45.3792972	0.255595205	0.44400766	2.005885372	1	0.573856661	2.8398038	1	29.34463926	2.715879326	5.71E-09	1.81293602	3.08E-06	2.154729501	0.445007423
Twist1+/-;Whsc1+/-ist1+/-;Chd7+/-_3	Compound	3	4480.239583	0.467562347	5.657312904	1.547043401	0.078631169	0.581152282	2.45440382	11.10970627	0.937101118	1.869102872	3.788496438	0.053661763	0.13199284	0.794921857	0.639386198	0.492980647	96706.2359	0.186356515	0.195697023	0.801655841	0.489940768	4.4777796	15.90901632	4.164735911	2.845686731	19.33460165	1.20879332	6.527431586	8.836075997	2.712582826	0.448655399	0.174584631	31.31574732	0.072952437	0.318207881	1.166602033	984.2873883	0.575257987	0.330462075	9596.802036	13.6590991	4.469458074	0.042688446	2.074005845	1.867321499	1.598585258	0.364446268
Wildtype_2	WT	3	3616.731151	0.356696533	7.856568737	1.113872229	0.058500437	0.510412411	1.715225676	10.23165299	0.768757771	3.816640596	2.638287184	0.033538534	0.158436767	0.901400654	1.785060349	0.427141868	44558.79167	0.201281408	0.166505146	0.837665588	0.48436284	29.27957033	17.70379181	4.314913902	0.996557426	12.9358279	0.71003011	6.973003317	6.698327599	2.966258843	0.313661986	0.128427441	140.8869285	0.063379006	0.313686458	1.166191353	112.5222012	0.445802248	1.526857185	16765.80798	7.87039786	4.071577465	0.025831489	0.810051408	0.86028685	2.085166773	0.380513978
Chd7+/-_3	Single	3	4440.596532	0.243478598	3.287115813	1.013983567	0.073185761	0.226854536	1.024250852	13.36769722	0.579862916	2.616756735	2.250865857	0.044015305	0.228702039	0.903995764	0.648155818	0.337244424	65796.45181	0.149549534	0.155719237	0.65892192	0.396737876	1.492425897	12.17266101	4.872703381	6.509041262	13.83672239	0.752823701	6.646020658	8.371113896	2.83853384	0.321671278	0.189309841	5.262981452	0.068802809	0.476089077	1.106364107	100.9148034	0.457014049	0.290810821	29467.12259	11.92606706	3.834862246	0.019841879	0.921307623	0.819705814	2.820931487	0.268868636
Wildtype_1	WT	3	3299.869363	0.312149224	6.201095553	1.279437655	0.081131936	0.358390865	1.664730777	9.749170192	0.650309584	5.460566054	2.570048955	0.059376216	0.347522862	0.785496475	2.656282265	0.418555626	26783.88821	0.190495501	0.150076785	0.91120463	0.491450114	13.57035668	15.9101072	3.509688771	1.039884296	12.17883193	0.726401085	6.765281468	7.6438376	2.784566587	0.330157859	0.189309841	86.06668931	0.058240566	0.357946699	1.286817266	144.7777741	0.457182375	0.498224942	18097.22176	8.166028326	4.808642842	0.036289207	0.97050807	0.834518724	2.040508213	0.305276405
Whsc1+/-_1	Single	3	4338.602815	0.215391602	1.054420636	1.808033522	0.112860736	0.401761171	0.393616667	10.71087899	0.819751972	1.399838497	2.593057719	0.088807403	0.405857559	0.85174168	0.376721172	0.520898538	63292.93856	0.134328004	0.176388893	1.21042316	0.355207273	1.002191893	9.605192773	4.159656376	3.426597395	9.717563505	0.807037244	5.146274618	11.46466932	1.60143646	0.211983988	0.282774259	2.752172606	0.099413657	0.404504842	1.771214238	1	0.83434551	1.075258989	81428.10692	14.7265679	3.563172475	0.019245992	1.233934246	1.282114559	1.503268629	0.224053233
Twist1+/-;Whsc1+/-ist1+/-_2	Single	3	2864.025271	0.529715344	2.226296137	2.045911139	0.112481251	0.58683488	1.06416186	10.06976043	0.924156401	9.576905332	1.707998141	0.077702045	0.11680774	1.16010728	0.542741105	0.559661326	52465.57956	0.080886728	0.354886159	1.214560051	0.567622922	2.556470565	20.23069884	3.549404238	4.288946354	31.29355953	0.91502721	5.071747792	9.920461429	3.206835911	0.175419198	0.467229703	5.181186805	0.058570709	0.237575706	2.037448489	101.2849026	0.841246991	1.24402095	124276.5755	10.09952316	3.726829249	0.030151365	1.041076838	1.272428019	0.710020433	0.835135269
Twist1+/-;Whsc1+/-_3	Compound	3	1556.787911	0.463721202	0.585068208	3.278922927	0.376250096	0.168971192	0.831920433	8.534212204	0.950442605	0.407448263	1.951007573	0.115923902	0.314136711	1.613413919	0.609366953	0.646351266	55452.72545	0.233961573	0.445697105	1.504503252	0.284317785	2.131985504	13.38657875	3.272575967	1.879954559	13.72646862	1.420569301	4.352153276	9.721716156	5.15221791	0.162602514	0.519350677	3.234808847	0.096729903	0.192555741	1.594022555	183.0122952	1.311275047	1.387611906	101937.8484	13.29922752	4.429735683	0.063047779	2.611419881	0.817666163	0.960584076	1.176282446
Twist1+/-;Whsc1+/-_2	Compound	3	1680.341805	0.391972273	0.417676797	3.38321553	0.322873097	0.340903953	0.559647459	10.17066922	1.020441788	1.154944651	1.566914599	0.089497688	0.310110048	1.707659678	0.186612897	0.61875404	33512.0879	0.18266109	0.413362052	0.940025521	0.270203879	1.805365382	13.62381769	3.016091215	1.153417415	17.08729489	1.265591677	4.479560791	7.869276561	4.124518189	0.116114794	0.536882076	2.355497476	0.094241102	0.186223613	1.425244682	1	1.331778267	2.884095117	159133.4232	8.290402694	3.799310163	0.041078953	2.92736813	0.707834512	1.001484981	1.086471523
Twist1+/-;Whsc1+/-ist1+/-_1	Single	3	2830.967217	0.503431362	2.263115824	2.044232917	0.118270127	0.53635217	0.850582814	12.10713867	0.833816391	4.47230208	2.585789776	0.086791049	0.670682919	1.072337584	0.843361312	0.62773543	60428.14818	0.173549769	0.354422479	1.2070515	0.525535101	2.121091814	19.18157986	2.647591559	3.657082367	26.67380345	0.879731962	4.897371824	11.90257505	2.163853589	0.21349493	0.47155956	4.265810655	0.058418756	0.318827439	2.302516115	1	0.750252343	1.67711328	136599.1005	9.378281937	4.46403298	0.041123597	1.255891129	1.163007353	0.797376121	0.677905661
Twist1+/-;Whsc1+/-ist1+/-_3	Single	3	3735.915947	0.563030798	3.590061138	2.043226616	0.110161767	0.559499247	1.186314326	11.42347424	1.054694384	5.036618839	2.227551724	0.088783098	0.273129209	1.226072044	0.75609014	0.672617261	80991.13165	0.100284087	0.310085319	1.207489469	0.476586163	1.568934832	18.27624104	3.185798774	1.875056469	33.70632942	0.917583617	5.059174388	9.736508846	2.694080975	0.151705538	0.430888306	3.85665825	0.059326916	0.307082113	2.245515653	1	0.768156189	1.914015007	247406.3415	9.193529175	4.39155737	0.037573655	1.328525234	1.142510822	0.878542472	0.844426918
Chd8+/-_2	Single	3	6301.989515	0.353345114	1.76408379	1.499517785	0.109577943	0.258737946	0.788802771	14.59012183	0.755167297	1.491117483	1.664553317	0.087219834	0.673921026	1.033391453	0.535130304	0.527706169	104730.9422	0.218443424	0.214450887	0.819153426	0.426242836	1.102895505	17.40078148	5.519565928	3.328080241	9.965412366	0.834082472	6.114620255	12.03702713	1.547315021	0.262488203	0.26140662	4.171967449	0.113529865	0.405738391	1.951445476	1	0.744990497	0.3487649	65861.72651	11.74999018	4.133895112	0.024901931	1.237071272	1.018820534	2.016666331	0.269341799
Twist1+/-;Whsc1+/-_1	Compound	3	1619.355261	0.364814184	0.461040531	3.16865544	0.300255272	0.571993475	0.40829454	8.618396715	1.150359138	0.216240799	2.267246381	0.100880949	0.154996128	1.524222257	0.296872549	0.654751133	60543.25764	0.115364505	0.433879212	1.225905669	0.283298025	1.151994233	12.9221544	3.199479215	1.858605744	16.98252719	1.18071512	4.457715944	10.28084548	3.952529281	0.142972829	0.613428927	3.723497717	0.09216745	0.195075486	1.497157165	1	1.418371661	1.036863709	97052.67665	12.83247164	4.364907941	0.043005158	2.630013064	0.660946113	1.104879527	1.068217378
Chd7+/-_1	Single	3	6577.700934	0.299322123	6.146882583	1.175135573	0.095106097	0.281030243	1.48493428	16.4401267	0.862604291	2.902111609	4.260508826	0.052316747	0.361478182	1.188315478	0.782211994	0.461762494	84009.75969	0.220772169	0.169804755	0.717577045	0.545043759	0.655831292	14.22264004	5.885862281	4.553063085	14.35245793	0.926339444	7.705504379	9.746181782	3.285285146	0.348971488	0.185177101	7.372932195	0.084462259	0.56399089	1.478992721	1	0.597018065	1.397305705	40185.77087	10.64790131	4.872287752	0.025592377	1.118022526	1.354490653	3.574007436	0.386160322
Whsc1+/-_3	Single	3	5397.955688	0.262640009	1.209357314	1.97839804	0.124470369	0.31278116	0.316158623	11.36655759	0.822472005	1.9528743	2.207888814	0.087262545	0.684573495	0.987217896	0.634592089	0.451576823	71872.34443	0.152836338	0.149301304	1.217990631	0.35207383	1.259762737	9.013027177	5.178860471	2.181149847	11.28102177	0.881362318	5.429135128	10.50111239	1.751199278	0.222590206	0.271798172	3.190241514	0.113605474	0.451987483	1.772290543	134.3408307	0.768156189	1.612440807	135146.8757	16.86360005	4.069216605	0.021565556	1.423079899	1.08749423	1.694853804	0.285536254
Wildtype_3	WT	3	4192.932038	0.357848126	7.313744882	1.470113967	0.084814939	0.581059117	1.971484995	11.72368014	0.726628474	4.554192805	2.817145641	0.053023784	0.428458669	1.0015313	2.285125665	0.424004274	58782.24089	0.187168974	0.172264715	1.294540812	0.568002873	21.78171136	20.00023609	4.555936981	1.029288843	16.20673083	0.926152282	8.719920076	9.419018825	1.455214611	0.378345604	0.109908291	126.1333026	0.067232632	0.388614931	1.349781732	1	0.512629292	0.987757553	29302.85882	8.87664788	5.488836435	0.03315002	0.888462847	1.406133902	2.265501363	0.424403345
Whsc1+/-_2	Single	3	5009.954969	0.255075073	1.235261572	1.611513578	0.073791224	0.309946067	0.352554884	11.46810798	1.032769847	2.108860486	2.102589093	0.069186352	0.377064396	0.809787508	0.4062718	0.463486889	65154.88152	0.15899589	0.168157625	1.033750842	0.322646453	1.176911815	9.668155189	5.282016459	4.366999363	12.22029497	0.984231974	5.460194537	11.72585575	2.338850587	0.235107907	0.319863327	2.369727843	0.11166757	0.404642848	1.5916977	1	0.886356964	0.30150806	122258.3043	15.08695505	3.621783577	0.018578478	1.349316124	0.906987729	1.635444042	0.255080588
Chd8+/-_1	Single	3	6847.801499	0.357161528	3.350633491	1.478248303	0.115829482	0.205812961	0.559847998	16.07581935	0.77360334	1.330902964	2.701484562	0.086275058	1.034990016	1.162912442	0.661541661	0.559542238	113848.1351	0.194532413	0.179230694	0.934783531	0.466355323	0.970113108	16.89425089	4.706834143	2.214795362	9.920478754	0.831291866	5.956893547	10.69974241	1.451500606	0.267128613	0.268234796	2.969984336	0.097954442	0.405987617	2.257866082	137.331888	0.705840771	2.009516325	100389.6101	9.846501914	4.244384522	0.024133769	1.415259358	1.022059988	2.275253674	0.288985373
Chd8+/-_3	Single	3	6312.459701	0.360134673	2.288255167	1.597243683	0.090507103	0.341583317	0.663313254	17.35490488	0.898991723	1.853271189	1.516436247	0.09438648	1.159076289	1.173884541	1.037874487	0.567239262	107660.7105	0.232111829	0.184806719	1.163614341	0.444103837	1.140521478	17.21988906	6.048356885	2.687165776	12.69095884	0.993865301	7.281678638	14.29432834	1.612386948	0.244521391	0.263462839	3.208113587	0.110810824	0.444685722	2.136764565	277.4760581	0.741405325	0.83455015	93231.95552	14.18605867	4.518430571	0.023661369	1.467207712	0.815510946	2.546664703	0.398953045
T8-2_2	Compound	12	56800.73919	0.892455349	59.79361441	0.056571678	4.430666465	20.19921006	27.7480632	8.010438124	0.00429837	4.164847901	121.3490916	0.001444756	3.066801113	1.068886373	3.185421597	0.574948604	2377726.105	1.164395845	0.185117589	0.687066957	0.003051802	0.468482295	111.1416721	9.553463398	10.67697366	80.68890794	0.428451221	2.252089202	0.846792232	3.068904784	2.510699076	0.232571888	0.220771271	0.537424682	3.833831653	14.50267292	1	0.46023782	0.67913622	27941.45471	79.25686213	1.677679599	0.028716924	0.063076735	3.431461658	5.001467934	2.817762446
Twist1+/-;Whsc1+/-ist1+/-;Chd8+/-_3	Compound	12	33125.63218	0.868114175	354.2840454	0.241293294	3.087741773	7.285396019	48.10406179	11.88002485	0.029695169	5.301868995	64.7040841	0.011617784	1.147769643	0.61240637	5.137392569	0.540993215	1097324.086	0.558253721	0.148717162	0.914030506	0.03053545	0.267759841	119.8329216	2.866872592	4.846420377	54.90547808	0.615307129	7.366795467	3.498163334	1.002971374	1.614994129	0.359359154	0.125946186	0.171777591	2.446390635	1.77E-07	1	0.517885246	1.138617797	129421.9751	93.50935823	1.952094067	0.038956477	0.100528769	2.382864738	4.82413475	1.80088528
Twist1+/-;Whsc1+/-ist1+/-;Chd7+/-_1	Compound	12	69384.20368	1.699805649	451.0866963	0.052236927	2.640777114	28.38914069	44.92628853	8.871861076	0.003322906	0.06727794	41.06688803	0.000934472	0.203226283	0.826725147	1.314702102	0.795717977	3494706.613	1.08788951	0.054470549	0.90588837	0.003432395	0.171897394	99.70729213	1.888535464	2.193576871	21.42108079	0.609272054	1.036022971	1.500820807	0.565925142	0.908079682	0.333985683	0.1025534	0.100099737	5.327443924	11.86929145	51.37234647	0.768156189	1.306507013	44026.10093	268.484077	3.24474266	0.016308529	0.032356624	2.224516982	5.732324711	2.988805845
Twist1+/-;Whsc1+/-ist1+/-;Chd8+/-_1	Compound	12	31350.44248	0.854246586	336.1745593	0.237846372	2.819750035	7.546940183	43.70498401	9.969117882	0.026775936	5.031361444	60.8353812	0.012565785	0.940919347	0.640924514	4.392772091	0.482764459	942690.0823	0.607347978	0.148159968	0.612054411	0.028215003	0.366247787	120.5370843	2.881760805	5.327181405	48.4802911	0.60085113	5.855819286	3.590195577	1.003223979	1.427359939	0.329968533	0.202983562	0.145587498	2.41908326	8.313542108	1	0.532544118	0.735379481	109614.0845	87.99498256	1.781355676	0.040467549	0.109527012	2.397909676	4.478281798	1.718255418
Wildtype_1	WT	12	52303.13069	1.164367806	570.6008614	0.140550811	1.915657153	16.01354486	29.82524621	15.46332742	0.002317182	0.410381201	22.32481425	0.001608799	0.179546855	0.535222796	2.373535999	0.724541897	3734259.455	0.544124734	0.023378885	4.034112745	0.001855734	0.129449104	91.02818304	7.295556953	0.669987146	122.326304	0.456703414	10.27091952	8.926141919	6.451846731	3.659574241	0.229316564	1.078132921	0.233300599	2.690199492	2.54222795	1	0.744169348	0.253054276	28700.96808	150.9266178	2.234353259	0.022545381	0.131141635	2.078874072	5.806825771	2.054646849
T8-2_3	Compound	12	60967.9083	0.975182662	91.90358932	0.070887195	5.217669337	20.49437254	32.33209447	7.175979155	0.003977181	3.907156471	135.9863831	0.001226526	3.051734581	1.200131651	3.024788727	0.728306097	2366310.115	1.141656899	0.181844152	0.494156582	0.003570752	0.402960427	111.7031719	9.383255793	8.267345555	89.35053029	0.445984318	2.335929943	0.833284187	3.203002016	2.381120851	0.242376951	0.481209248	0.537424682	4.092565891	14.82131124	1971.665666	0.520893037	1.00020117	38862.568	83.33558078	1.905519452	0.02521104	0.063838396	3.609221024	5.1577186	3.143698356
Twist1+/-;Whsc1+/-ist1+/-;Chd7+/-_2	Compound	12	68756.30843	1.6825646	396.1631598	0.048130788	2.708264658	27.96030224	41.70488612	9.498363893	0.003511969	0.006625364	42.08448093	0.001048722	0.268652002	0.723110275	1.108291374	0.783434071	3106896.276	0.92272302	0.056372328	0.895602936	0.004613801	0.158830867	108.2818264	1.741950155	2.811952899	24.12209232	0.634081215	1.166188966	1.518785137	0.545066775	0.810849828	0.344065279	0.195672059	0.106929136	5.159066481	12.64183036	50.59020526	0.768156189	1.126673211	47504.20274	284.4104405	3.176797116	0.014722433	0.037780237	2.457645353	6.297995024	3.379387634
T8-2_1	Compound	12	63724.61219	0.866883164	57.89410935	0.075417572	5.016931385	24.40895599	31.10535191	8.436357494	0.003580153	2.998979404	111.3545612	0.001203375	2.623630753	1.072784353	3.520438538	0.561656267	2591280.884	1.230232425	0.157709941	0.790518946	0.003164599	0.815413967	109.9260537	10.86102601	4.036722135	87.30449748	0.443026037	2.026748351	0.91585305	5.38082559	2.602358257	0.272618034	0.343392845	0.588288412	4.702450602	13.61824943	1	0.511436326	0.543233824	20577.49625	91.53760644	1.917910122	0.027993781	0.065952315	4.507954425	5.455121653	3.175444667
Wildtype_3	WT	12	53919.34703	1.02811656	702.3588901	0.145723892	1.952216792	14.36487475	28.70697439	15.07912552	0.001951162	0.000130961	18.75451377	0.002050501	0.20020937	0.483436212	1.973614496	0.711235732	3224402.783	0.526459624	0.018686394	3.047746998	0.001647369	0.137644302	104.6340131	7.479507734	0.506000323	122.5549541	0.440149786	10.07293558	7.584425415	4.497953172	3.240046831	0.189309841	0.631579165	0.221972831	2.413225024	2.442685063	64.07668335	0.699171537	0.910714383	62666.99631	131.6591817	2.058436038	0.021817069	0.141242316	2.004968531	5.620106323	1.940162985
Twist1+/-;Whsc1+/-ist1+/-;Chd8+/-_2	Compound	12	34902.99292	0.798704694	413.6225213	0.233574019	3.485173656	7.744485643	48.61470711	12.54396717	0.032897193	5.972368483	62.04083181	0.011794322	0.921038436	0.705228965	4.730485354	0.53861445	1056924.389	0.68549423	0.141408571	0.925279267	0.034037621	0.505297458	133.4746365	2.892286187	4.703641886	59.99697106	0.634944234	7.171964475	3.427466796	1.159490423	1.713811788	0.362277281	0.218841984	0.170845805	2.337191149	8.588857587	46.1579347	0.523650369	1.128694114	142997.2817	97.21233192	2.087300039	0.039610685	0.111672546	2.2886612	4.990414381	1.775668631
Wildtype_2	WT	12	0.006155185	1.160112654	610.1035351	0.139419755	1.791174045	15.43431645	30.79677092	15.64349252	0.00259076	0.100402397	21.23042914	0.00194251	0.143931976	0.546350591	2.377624337	0.713534863	3451782.237	0.48119423	0.026544786	2.851622886	0.001859956	0.343503708	93.60562385	7.592727172	0.719766471	118.5942606	0.40210084	11.56267208	8.142134217	8.744413146	3.944526978	0.221215906	0.922199144	0.224220919	2.551882688	2.811138786	58.97357362	0.768156189	0.481791081	59622.28293	150.3100174	2.128501847	0.025107924	0.128241807	1.997824947	5.568211489	1.835260617
Twist1+/-;Whsc1+/-ist1+/-_3	Single	12	43585.29355	1.894968889	404.2776711	0.098415251	2.318339573	27.0217369	51.11822789	17.84689821	0.001847472	0.007348172	35.93744789	0.004526545	0.404053413	0.667078286	3.147038606	0.774594927	2805977.663	0.556125338	0.029210938	3.477754161	0.001497117	0.278145576	89.09154425	7.740372343	5.022000183	44.33646045	0.582734452	8.014078811	3.944293371	3.583091751	3.40219196	0.362641085	0.497044265	0.211459245	2.787517469	9.102931423	56.10945357	0.560776054	0.92934337	79394.8768	97.5998919	1.888201073	0.020612115	0.472968832	2.9698893	5.565449795	1.65E-07
Twist1+/-;Whsc1+/-ist1+/-_2	Single	12	41393.14521	1.936259246	351.4467345	0.091634381	2.246403431	25.68767358	53.62555733	16.90077751	0.001744191	0.000130961	33.02687436	0.004729066	0.571764032	0.588138344	3.07251869	0.820304981	3107477.567	0.466872693	0.030064034	3.909508053	0.001868088	0.150245556	91.28930225	7.873765945	6.293788982	45.44959491	0.625195272	8.593288491	4.513588399	3.467172845	3.665965711	0.3783156	0.244344253	0.254750272	2.761630306	9.381675349	55.95429211	0.529679295	0.386677425	56234.06357	111.7930879	2.157507397	0.020883926	0.488892939	3.004749227	6.60709829	1.387337834
Twist1+/-;Whsc1+/-ist1+/-_1	Single	12	38819.26579	1.658763444	462.9639894	0.114389437	2.427290421	26.31492503	52.38420511	17.247352	0.001802192	0.000130961	37.54665213	0.004895761	0.397186125	0.688775178	3.225184014	0.720479443	2972806.136	0.591818947	0.026186316	3.121527966	0.001834995	0.115866148	100.2787411	8.248582823	4.650521647	49.75270756	0.565908217	8.138194079	3.671858572	3.600674755	3.656264366	0.319372473	0.034994708	0.240875972	2.793301988	8.372291657	56.09597389	0.516401372	1.045260119	70512.63918	106.9429797	1.997929125	0.02380886	0.534153205	2.659821897	6.216027726	1.65E-07
Twist1+/-;Whsc1+/-ist1+/-;Chd7+/-_3	Compound	12	80356.27792	1.934700234	519.6324899	0.048620553	2.584430471	27.06624636	50.4598498	9.493127787	0.00346007	0.269912955	45.92968309	0.001104821	0.320277335	0.764872684	1.154430534	0.789840774	3457043.958	1.126175164	0.051618129	1.021864413	0.004263434	0.137727001	105.1997415	2.001764078	1.713084369	28.37166207	0.689692434	1.176587137	1.485514144	0.603890287	0.730577612	0.320512548	0.123531307	0.108214843	6.302531914	12.0212468	60.6179898	0.820452547	1.545035158	59648.10196	302.1643292	3.066405377	0.017352222	0.052152669	2.540690809	6.566140674	1.65E-07
Chd8+/-_2	Single	12	38895.4324	1.156006655	904.5388376	0.159747804	2.81975266	18.10358949	20.82432332	16.87320438	0.01067175	1.92809828	25.96300976	0.005026662	0.237302509	0.598001148	4.804379467	0.798961309	7129597.439	0.71721006	0.038817637	5.887002838	0.009821841	1.085632759	140.2670256	8.669539562	1.884076231	73.31080179	0.461106806	12.28880935	9.428033727	4.61012942	4.169387496	0.235017576	2.915911287	0.146311802	2.000107247	2.889907632	1	0.768156189	1.147181365	122432.953	155.8502908	2.046824448	0.023349087	0.120153469	2.821424019	5.471554162	1.404022681
Chd7+/-_2	Single	12	25401.78257	1.540353928	792.5433167	0.15589788	2.576015295	13.19233478	28.81831048	19.46619829	0.004702601	0.286760273	17.88282611	0.004585283	0.117996773	0.547617204	3.594920125	0.729195408	6045961.988	0.589691342	0.028705164	2.760641722	0.005153223	0.211060693	113.1561868	13.41600894	0.854938753	41.26715401	0.5307643	11.13889261	9.216027357	5.562523504	4.588845632	0.217581934	0.531216947	0.136695012	1.675938871	3.105522015	40.5491676	0.904393139	0.951836519	140624.5132	138.0491954	2.191089823	0.020303838	0.090692609	2.20983078	5.418835764	1.520657205
Chd8+/-_3	Single	12	38563.788	1.11622614	804.3085202	0.160082713	2.838976987	17.76388086	22.39737855	16.79637876	0.011122126	1.680092972	27.4101468	0.004509243	0.426980081	0.59362878	4.736047285	0.740566137	6490350.611	0.535561418	0.030966584	5.942540937	0.009275569	0.902425615	105.8852169	9.474548674	1.34698788	69.65101384	0.439843802	11.83537191	10.76107021	3.914427232	4.030206016	0.220623318	3.501242269	0.148232453	2.259220896	2.625366276	51.52175951	0.76872581	0.954260912	111183.957	157.3732884	1.941964843	0.020030857	0.119903031	2.359011187	4.807657444	1.292933645
Chd8+/-_1	Single	12	39649.95448	1.14246962	896.0394341	0.162553774	3.003236934	17.92633644	25.28362253	17.88975741	0.012482984	1.874260594	24.2722895	0.004988227	0.2958732	0.627994825	5.202498786	0.806201815	7214756.27	0.624113896	0.028710905	6.698303814	0.010205655	0.571054841	111.8243395	9.799857903	1.412273806	72.85819835	1.96E-08	12.85803203	11.38122452	4.044879153	4.096055709	0.229051664	2.752820248	0.152209044	2.06661877	3.032564342	1	0.725165081	2.80E-05	138236.5689	167.0883527	2.090571838	0.023939518	0.119209021	2.352585297	5.31451857	1.323319321
Whsc1+/-_2	Single	12	28851.40456	1.530156459	1101.734716	0.154452707	3.573536932	14.11627055	31.65874294	16.71180155	0.005830741	0.0073878	18.40658891	0.005518811	0.174748022	0.473405974	2.058081161	0.844956328	6652841.569	0.82152159	0.017600075	6.515972849	0.007394809	0.240029119	139.1881034	16.12107456	1.353354855	55.70764514	0.537483133	13.71956969	12.61387708	6.175116214	4.167186131	0.316583897	0.790644329	0.114587159	2.337550803	4.391754461	56.41204387	1.101133741	0.915415555	122019.2509	196.9321908	3.017127793	0.024883119	0.091234746	2.438402634	6.47071388	1.54497353
Chd7+/-_3	Single	12	18034.92666	0.926308996	770.3783082	0.410923008	2.136608919	10.0754316	19.87976331	14.20341609	0.17063885	0.522955355	11.59668705	0.016548973	0.195659097	0.593908734	2.014946128	0.462533571	3778951.81	0.444679354	0.048270036	2.291674564	0.106882609	0.454694877	88.33245734	13.1570396	0.814326892	36.23224213	0.530581521	9.561294871	6.469381182	4.339352826	2.750248257	0.121693031	1.716094486	0.103999033	1.574711391	2.398371635	51.19490361	0.616408582	1.340667364	127168.1406	91.2818775	2.709721216	0.026125665	0.283331277	2.712913494	4.245362627	1.343961231
Whsc1+/-_3	Single	12	30571.71975	1.756686387	956.4307565	0.144798413	3.50849745	14.01841261	34.03564702	15.65988068	0.007440096	0.308743179	20.38503281	0.005766694	0.059149196	0.52428261	2.414780716	0.901825237	6789713.395	5.19E-07	0.017760804	6.652424058	0.007430478	0.160220264	122.1401492	14.29944629	0.997843386	56.85600596	0.571507607	14.40351736	12.70382705	3.084439848	4.465294886	0.173538185	0.496559704	0.113335485	2.553299498	4.033554437	1	1.030834335	0.755334303	167687.6159	211.7233968	3.175550984	0.021906047	0.098914953	2.130427084	6.845158441	1.415053542
Chd7+/-_1	Single	12	30922.57406	1.728415837	972.634334	0.156532876	2.636330957	15.12407029	31.31647072	21.09469546	0.005365571	0.175732661	19.74775193	0.005325894	0.148044935	0.547617204	3.558792344	0.796549651	6378499.843	0.704744656	0.024675674	3.304450478	0.005586175	0.035275196	117.4913019	14.11097802	0.560486813	49.82141295	0.463436472	12.05228686	8.949770902	4.958187397	4.763890907	0.213625617	1.037502747	0.145172119	2.039601916	3.2580735	60.99391679	0.883517879	1.262806189	121438.8883	142.8449956	2.421759216	0.024375352	0.111488773	2.313423104	6.017957761	1.846568336
Whsc1+/-_1	Single	12	30407.9915	1.779762404	1270.485188	0.156119657	3.727594397	13.7451188	33.43792644	17.90886211	0.006806116	0.080845369	20.17383676	0.005544135	0.111296929	0.458919491	1.943622226	0.900410446	7010790.596	0.774363843	0.017408224	6.660942237	0.00751069	0.306018714	173.9746554	16.28696825	0.825956789	55.08654952	0.55043766	16.25256982	12.16967223	5.430666924	4.283789619	0.257653377	0.419339833	0.106188124	2.270210464	4.382702764	68.59135119	1.12042159	0.658236464	167157.1228	198.8501014	3.126815968	0.025225584	0.090117939	2.501685832	6.943550774	1.452855532
Twist1+/-;Whsc1+/-_1	Compound	12	40465.31161	1.501733512	453.4269856	0.114954077	3.441179749	14.48898498	42.03379016	16.57101647	0.009301019	0.379163334	24.41412297	0.001338897	0.15314307	0.819118892	2.430046777	0.823271349	6926274.52	1.220592579	0.059148394	1.686854596	0.006991396	0.18272506	144.1178976	2.752988172	1.932809968	16.47818573	0.857497225	5.079338591	3.827958397	0.808690075	1.12337431	0.592129845	0.47829519	0.089129566	3.64350354	9.298023258	80.42305214	1.751778191	0.10350393	95864.27816	253.5006263	3.972503752	0.024312685	0.083254124	1.814408569	7.08501261	2.398946461
Twist1+/-;Whsc1+/-_2	Compound	12	45084.51221	1.598649712	652.9524202	0.131778054	3.669364834	14.04112581	41.14749151	20.64311817	0.010680216	0.096852339	25.57835339	0.001444302	0.126941977	0.938457429	2.000328874	0.795053877	6223524.973	1.247150761	0.061830285	1.573741449	0.008434574	0.033605812	159.731537	2.888404284	1.648482139	16.03721069	0.92726541	4.835605933	4.204002048	0.904694308	1.250046561	0.610325698	0.264511592	0.102133856	3.804279634	9.711362717	73.95487948	1.753181545	0.40554716	131787.5952	241.8081837	3.937460736	0.023834473	0.0896285	1.763667051	8.563921439	2.420701403
Twist1+/-;Whsc1+/-_3	Compound	12	45719.96973	1.763308631	808.5680372	0.120576067	3.885581751	16.06198022	44.50645517	18.28238012	0.010747689	0.624061675	24.11483684	0.000978106	0.320761676	1.015940356	2.270805518	0.818678133	6808771.878	1.260606566	0.054335139	2.173522702	0.007184545	0.084916406	140.8936198	3.400076371	1.123804439	14.85332048	0.876177614	5.227301007	4.144589468	0.908428737	1.278647228	0.563593061	0.528484662	0.113828213	4.018122202	8.97702421	1	1.775590365	0.663997173	173323.7067	255.1526773	4.151821579	0.024999652	0.082214591	2.136472687	8.605747241	2.581296056
siChd8_3	Single	NCC	6.383955863	0.272403539	1.59E-05	0.659341272	0.13395774	1.34E-05	3.157891355	6.473367525	0.000150088	0.000130961	63.78007292	3.97E-09	83.58413805	0.128059385	39.34496995	1.058686078	714209.2277	0.445006904	1.252908418	1.39E-05	0.000231983	0.191156138	44.97071902	0.592504538	2.902608773	0.030773941	0.911374887	3.258354023	2.93E-07	0.701037356	5.17E-07	0.061027273	4.16E-05	7.378623532	2.039125503	9.223975141	1	0.768156189	0.406251737	1	0.208334224	0.530863637	0.440616257	0.010170073	31.38203046	0.271653359	6.335672158
siWhsc1_1	Single	NCC	0.006155185	0.319239151	1.59E-05	0.780424838	0.168117363	1.34E-05	4.33369916	7.514793844	5.51E-05	0.000130961	104.9257003	5.028189601	89.03108436	0.144024211	59.03939408	1.413006795	299048.9435	0.446343941	2.133534806	0.005597792	0.000467376	0.040033603	55.36658218	0.633556733	2.350744954	8.21E-06	1.044278284	4.445932145	2.93E-07	0.769327108	0.00062684	0.059300881	4.16E-05	9.041521956	2.30716859	10.28785333	1	0.747959515	0.420261846	1	0.00301263	0.420979027	0.462030661	0.019344031	25.37912971	0.5152835	5.807039341
siTWIST1&siChd8_3	Compound	NCC	0.006155185	0.531836586	1.59E-05	0.632111469	0.057215417	1.34E-05	3.572001116	7.257662614	6.13E-05	0.000130961	60.10325026	5.813267833	72.96395172	0.15130356	30.090859	1.188171065	869610.6639	0.262162895	1.591171051	1.39E-05	0.00033057	0.306247891	70.55095342	0.26045809	2.135305964	8.21E-06	1.045328814	3.851716852	2.93E-07	0.495681407	0.00303323	0.069363987	0.003585083	6.564208138	2.008073576	8.957976798	1	0.912097621	0.451003434	1	0.347296762	0.666497328	0.504793069	0.001037263	20.2832766	0.452818784	6.250303985
siTWIST1&siChd8_2	Compound	NCC	1.875068818	0.493139989	1.59E-05	0.548061199	0.043694478	1.34E-05	3.001938505	6.224679982	0.000135847	0.00997377	55.5332076	4.891808271	87.4184453	0.144451405	37.63598695	1.083296449	1033770.001	0.218367851	1.457431128	0.007390474	0.000391274	0.302024508	56.00760937	0.166281261	2.272941476	8.21E-06	0.925847225	2.757940654	2.23E-05	0.394412347	0.001852212	0.055947975	4.16E-05	7.44575551	2.183419342	8.050031971	76.15809643	0.854344428	0.276998803	1	0.215917015	0.455834252	0.374340547	0.009479012	16.06799842	0.392731986	6.303522829
siChd8_2	Single	NCC	0.470564616	0.322529074	1.59E-05	1.04E-07	0.129180511	1.34E-05	3.355897307	6.462873673	0.000163939	0.000130961	73.0879021	3.97E-09	125.6212738	0.196993608	54.73204136	1.107596315	1060133.707	0.54269351	1.773713739	1.39E-05	0.000649702	0.334764089	64.65139675	0.842390721	3.227198729	8.21E-06	1.015171831	3.894110671	2.93E-07	0.624133452	5.17E-07	0.037215626	0.079487266	9.25413951	2.35105404	10.97106064	1	0.768156189	0.175392266	76.45011226	0.042778601	0.472455277	0.455994452	0.014114926	36.65672464	0.222849202	6.919300804
siWhsc1_3	Single	NCC	0.006155185	0.320850249	1.59E-05	0.78646041	0.182348088	1.34E-05	3.776282499	7.188060366	0.000102112	0.000130961	107.4173628	3.97E-09	105.5473245	0.161885405	62.09679809	1.326213561	396180.869	0.446696033	1.809214121	1.39E-05	0.000445065	0.07565745	55.21502391	0.681441845	1.584672566	8.21E-06	1.015017665	5.175776917	2.15E-05	0.750528762	0.001326788	0.036213068	4.16E-05	9.06898028	2.187381174	9.607984577	73.25829679	0.692116485	0.703022778	1	3.73E-05	0.44461762	0.507634754	0.025205592	36.21851478	0.492983766	6.60698962
siTWIST1&siWhsc1_3	Compound	NCC	2.794732477	0.730933721	0.01985921	0.828962088	0.081210799	1.34E-05	5.221746433	9.245072507	7.41E-05	0.000130961	84.61088589	6.298877591	105.1084272	0.218151582	57.5442199	1.486873764	888452.9719	0.307493659	2.116876922	1.39E-05	0.000721104	0.318862095	76.32697716	0.338581234	1.469259719	0.010247352	1.209810447	5.097793808	2.93E-07	0.980019269	0.003171828	0.062450135	4.16E-05	11.57174456	3.153632045	10.35772375	1	0.768156189	0.733617275	1	0.359927668	0.544099479	0.531677944	0.009689112	26.14906332	0.705672349	8.128998934
siTWIST1&siWhsc1_2	Compound	NCC	2.809373338	0.707718473	1.59E-05	0.790085498	0.08080569	1.34E-05	4.102535743	8.618396715	9.52E-05	0.000130961	65.2513161	6.228688751	87.96337661	0.153289386	51.0703736	1.452552327	607500.1256	0.278899152	2.1243413	1.39E-05	0.000600422	0.595813406	71.83756323	0.34885213	1.946538863	8.21E-06	1.130836732	4.68910675	2.93E-07	0.467095102	5.17E-07	0.050389014	4.16E-05	10.80383654	2.807802144	9.570637335	1	0.826870319	0.996050547	1	0.343935403	0.53477174	0.520940103	0.006109945	23.46100788	0.619678359	1.65E-07
siWhsc1_2	Single	NCC	3.733247182	0.404406386	1.59E-05	0.944902889	0.201316681	1.34E-05	3.487867505	7.971314266	0.000225497	0.011347256	117.4075999	5.536115383	111.3176926	0.176712023	69.99555358	1.594371165	495787.3248	0.565129526	1.728017042	1.39E-05	0.00050023	0.211180809	64.31124014	0.669987133	1.976606844	0.030577072	1.183664216	4.647225955	2.93E-07	0.868602516	5.17E-07	0.05139771	4.16E-05	12.3579757	2.358124981	10.59530183	4765.51955	1.019179062	0.671499655	1	0.080806216	0.524440279	0.506029219	0.016681554	36.34720191	0.649431618	7.552131924
siTwist1_1	Single	NCC	0.619547233	0.716609514	1.59E-05	0.873988984	0.051834355	1.34E-05	4.784360898	6.799336289	2.85E-05	0.000130961	80.4437372	4.818982939	76.11792394	0.146269139	53.8736724	1.431751393	1040163.808	0.44294439	2.111004447	0.001395377	0.001160445	0.158005334	74.6408381	0.201027335	1.539255328	0.07764992	1.234774995	4.905994888	2.93E-07	0.562770152	0.002968827	0.042091136	4.16E-05	11.43972181	3.405446635	8.96709344	1	0.768156189	0.518166776	1	3.73E-05	0.53416588	0.523659693	0.016956269	23.48018927	0.677684967	6.975668203
siTWIST1&siChd8_1	Compound	NCC	0.006155185	0.644443399	0.061715823	0.742801191	0.057648681	0.029469124	3.99814601	8.048894492	0.000552002	0.000130961	70.84351409	6.188691318	108.7824943	0.184845646	42.19273671	1.363226684	1281131.323	0.359460005	1.776296165	1.39E-05	0.000717421	0.233944725	75.49903318	0.277751251	1.891086803	8.21E-06	1.117149596	4.439464319	0.000676124	0.379616061	0.000922551	0.060307967	4.16E-05	8.183092721	2.749501993	10.0196889	104.8732256	1.034019777	1.751690666	1	0.289503315	0.606149312	0.510892698	0.003509729	26.48319477	0.498582209	7.322640043
siTWIST1&siWhsc1_1	Compound	NCC	0.006155185	0.68053143	1.59E-05	0.75512716	0.086123115	1.34E-05	4.68957571	8.053984187	0.000103641	0.088613416	93.05850809	5.779283024	91.18036475	0.16480717	46.35457026	1.34070073	651118.803	0.317213348	2.034400885	0.010720285	0.000767501	0.17569755	77.52408027	0.340921859	1.997911476	8.21E-06	1.395125452	5.66137991	2.93E-07	0.518974942	0.000750285	0.051118035	0.056281494	10.39040846	2.957468218	10.40608007	96.66253014	0.768156189	1.903922546	1	0.043270967	0.600022465	0.551138876	0.00588833	24.14607624	0.645815477	6.817417666
siTWIST1&siChd7_1	Compound	NCC	0.006155185	0.688944077	1.59E-05	0.74813893	0.051095778	1.34E-05	4.687853911	6.782445762	1.77E-05	0.000130961	92.74435984	5.260642076	77.21172203	0.20862209	55.9256625	1.726558252	1100986.866	0.422233323	2.038734515	0.006298572	0.000940564	4.13E-05	74.99641289	0.290602783	1.366097405	8.21E-06	1.161573129	4.910153793	3.33E-05	1.04108769	0.005289847	0.060232963	4.16E-05	11.96675924	3.534824373	7.696173011	1	0.718794251	0.514822357	1	0.033897768	0.273070926	0.461607966	0.009268355	27.83905101	0.609338211	7.143367691
siTwist1_2	Single	NCC	0.006155185	0.623894445	1.59E-05	0.873064876	0.063439858	1.34E-05	5.139114722	8.099307487	0.000120906	0.059071068	77.68028162	5.559946787	68.88983155	0.165179393	51.52862156	1.332805986	965826.0578	0.368531408	1.865348932	1.39E-05	0.00078249	0.111798934	74.83898951	0.236326968	1.049293283	0.024061615	1.146590481	5.285941175	2.93E-07	0.338749259	0.003326007	0.032853329	4.16E-05	9.784509089	2.881237376	9.372926292	7780.735317	0.738611415	2.000226921	1	0.134610434	0.655894881	0.566766997	0.007378019	26.70647614	0.743258437	7.582119879
siChd8_1	Single	NCC	0.006155185	0.344975839	1.59E-05	0.829989475	0.183897009	1.34E-05	4.577627629	6.872986595	9.75E-09	0.014256602	79.71644996	7.364377668	126.7158443	0.204746199	52.54925737	1.280716999	1103525.014	0.653724241	1.547451498	0.027164606	0.000415167	0.148402613	66.08815457	0.709810883	1.666296539	8.21E-06	1.080866607	4.44922201	2.93E-07	0.871962543	0.000788638	0.042606877	4.16E-05	10.66953587	2.593669125	10.2666749	1	0.828441008	1.696470803	217.7222086	0.089341371	0.566021457	0.630158373	0.005689925	50.25183952	0.291905278	8.790029578
siChd7_1	Single	NCC	0.730108557	0.578557682	1.59E-05	0.949416339	0.142422477	1.34E-05	6.675706468	7.659910721	8.79E-05	0.000130961	140.5157897	7.250831424	94.79004168	0.278686804	96.17943705	1.681185725	1350452.563	0.953440228	2.040039882	0.006577555	0.000832683	0.004900057	70.94784976	0.66024773	1.274857925	0.008761303	1.293872765	5.599892655	2.93E-07	0.514184737	0.01565176	0.031216186	4.16E-05	14.86338062	4.058149455	12.13729791	1	0.636774565	0.431427784	3084.037475	3.73E-05	0.199671653	0.423884206	0.044067888	46.04176323	0.494260242	7.759552297
siControl_2	WT	NCC	0.006155185	0.394215741	0.001670166	1.100656068	0.195392716	1.34E-05	5.330887151	6.503900288	0.000171957	0.000130961	82.50510223	7.115077609	93.54391441	0.213199711	70.13432176	1.369617887	884706.6256	0.58512113	2.164765627	0.001455752	0.00083599	4.13E-05	71.09382796	0.71675373	1.488432825	8.21E-06	1.175347275	7.477377131	2.93E-07	0.835925515	0.002282209	0.030327608	0.048039832	10.76168579	3.346740909	11.53217591	1	0.61597203	0.414254221	105.0096885	0.09793244	0.52233491	0.641535488	0.013306942	52.16326583	0.617085316	8.225483136
siTwist1_3	Single	NCC	0.006155185	0.666615141	1.59E-05	0.879447605	0.05924718	1.34E-05	4.553516795	8.72841749	6.03E-05	0.000130961	82.86852047	5.26718118	75.74235923	0.164115763	56.55067969	1.555938934	913572.0863	0.379769907	2.206255005	1.39E-05	0.000678108	0.285971974	85.4310787	0.26152932	1.887220363	0.011190459	1.318977817	6.431354133	2.93E-07	0.560383631	0.005264694	0.049549999	4.16E-05	11.62034232	3.157002405	1.77E-07	104.8877252	0.748277943	0.413773086	1	0.168248158	0.588176398	0.471169008	0.005916092	20.83758436	0.813389048	6.401180927
siTWIST1&siChd7_3	Compound	NCC	0.006155185	0.76218366	1.59E-05	0.807561129	0.056882591	1.34E-05	4.995015672	7.579314915	0.000393692	0.000130961	94.18131314	5.957458663	70.49439297	0.175901423	51.46677846	1.617873339	1211200.607	0.376202974	1.75526874	1.39E-05	0.000699063	0.170996663	74.5431654	0.232189382	1.435086917	0.090590232	1.203867148	4.896363745	2.93E-07	0.565936877	0.000194723	0.048199732	4.16E-05	11.08978687	3.328336313	8.75572864	125.4350256	0.719844664	2.80E-05	125.4350256	0.01871699	0.249097861	0.557904575	0.004999697	28.77382591	0.705696438	6.904749526
siTWIST1&siChd7_2	Compound	NCC	0.951257522	0.80630814	1.59E-05	0.760825925	0.061166582	1.34E-05	5.255960216	8.618396715	0.00020487	0.000130961	93.95384215	6.167812939	81.1739752	0.204321064	67.75088835	1.65966277	1296638.536	0.403084742	1.792921701	0.047134382	0.000777178	0.280908261	79.66910723	0.242442148	0.533044816	8.21E-06	1.284905063	5.664428916	2.93E-07	0.649829709	0.004318445	0.05493231	4.16E-05	11.91714786	4.159621417	8.944280476	1	0.7083809	1.323112735	1	0.057651971	0.315486256	0.555265475	0.017898914	30.71909858	0.708501056	1.65E-07
siChd7_2	Single	NCC	0.750276031	0.693800412	1.59E-05	1.055198133	0.211189288	1.34E-05	7.723203233	8.618396715	2.50E-05	0.000130961	135.2256525	7.647560072	97.27271536	0.316852911	101.545954	1.614946527	1250137.966	0.80223964	1.958067339	1.39E-05	0.00101492	0.025177048	81.22043221	0.81818715	0.756864133	0.00500184	1.40768255	7.213513764	2.93E-07	0.540295364	0.005361367	0.035518412	4.16E-05	14.73695336	4.337374431	12.33429339	121.8933275	0.633317506	0.422882854	1	0.031829892	0.233908601	0.588882221	0.052160433	60.87294583	0.515364407	8.418865821
siControl_3	WT	NCC	0.006155185	0.530951243	1.59E-05	1.173621024	0.149170634	0.011261729	5.76596459	7.625127866	3.38E-05	0.000130961	104.9213603	6.692251738	102.8630098	0.228804653	70.54425371	1.624495964	1194590.071	0.66803455	2.2915065	1.39E-05	0.000874851	0.09561132	73.58992298	0.612482503	2.075635951	8.21E-06	1.170770411	6.491646571	2.93E-07	0.670100428	0.001850919	0.033802989	4.16E-05	12.7297514	4.038310194	12.08201346	1	0.620056775	0.188378006	1	0.054943585	0.539157142	0.532306979	0.014716133	43.56494644	0.544758935	7.710126484
siChd7_3	Single	NCC	1.046027173	0.527770159	1.59E-05	1.053453455	0.200299238	1.34E-05	7.53316721	7.943961474	0.000109327	0.022255897	129.2733221	8.682941441	93.9350633	0.277566283	95.1736655	1.646925044	1401685.172	0.858688242	2.311474145	0.037694673	0.000957253	4.13E-05	79.86376011	0.746514222	1.256481063	8.21E-06	1.392693556	6.569012464	2.93E-07	1.309609135	5.17E-07	0.051776766	4.16E-05	15.17209373	4.099937635	13.5047084	1	0.768156189	2.277486436	169.9424311	0.475466897	0.23841481	0.58189281	0.04243155	64.71240043	0.478590189	9.901016639
siControl_1	WT	NCC	1.057935118	0.474899892	1.59E-05	1.233169761	0.205290054	1.34E-05	6.335665842	7.820745189	0.000202715	0.000130961	94.49705512	6.522515032	91.44339406	0.248294118	78.91832282	1.578883664	974886.6338	0.672119907	1.956025053	1.39E-05	0.001055066	0.035501178	75.73217729	0.684957992	0.820012455	0.016926962	1.359020669	9.124502664	2.93E-07	1.451500606	0.005692127	0.051926267	4.16E-05	15.0747214	4.142621738	10.70409906	171.8770511	0.710328746	0.389512475	1	0.250057392	0.700811172	0.766489444	0.022685273	58.90777495	0.712750814	8.93944369
[truncated: 44 more columns]
