# Supplementary material for: TWIST1 and chromatin regulatory proteins interact to guide neural crest cell differentiation
Source: eLife. 2021 Feb 8;10:e62873. doi: 10.7554/eLife.62873 (PMC7968925; doi:10.7554/eLife.62873)
Supplement: Supplementary file 1. [file elife-62873-supp1.xlsx]

## Sheet: O9-1_Test
	Twist1	GFP	LogFC	p.value	adjp	DEP	Log2 expression in E9.5 Wnt1-Cre NCC (Fan et al. 2016)
Tnks1bp1	0	51.2	-8.683	7.58e-46	2.49e-43	TRUE	6.8647
Nes	0	41.2	-8.368	2.15e-37	4.12e-35	TRUE	10.8974
Akap12	0	40.3	-8.338	1.81e-35	2.97e-33	TRUE	7.96
Tp53bp1	0	26.4	-7.732	3.92e-24	4.3e-22	TRUE	#N/A
G6pdx	0	21.9	-7.463	7.18e-21	6.12e-19	TRUE	7.5577
Klc1	0	18.3	-7.203	1.12e-17	8.07e-16	TRUE	9.1762
Macf1	0	16.5	-7.059	3.86e-16	2.28e-14	TRUE	9.0481
Map1a	0	16.5	-7.052	4.38e-16	2.52e-14	TRUE	#N/A
Pxn	0	14.9	-6.909	8.96e-15	4.21e-13	TRUE	7.0041
Dbn1	0	14.2	-6.844	3.35e-14	1.54e-12	TRUE	8.3814
Erbb2ip	0	13.7	-6.791	1.89e-13	7.76e-12	TRUE	7.1229
Sptan1	0	12.2	-6.625	2.04e-12	7.02e-11	TRUE	#N/A
Fdps	0	10.8	-6.443	4.23e-11	1.19e-09	TRUE	12.206
Tacc2	0	10.4	-6.391	5.31e-10	1.16e-08	TRUE	6.8771
Synj1	0	10.1	-6.353	1.54e-10	3.93e-09	TRUE	6.664
Cttnbp2nl	0	9.9	-6.332	2.34e-10	5.54e-09	TRUE	8.9715
Tp53bp2	0	9.9	-6.325	3.81e-10	8.59e-09	TRUE	#N/A
Mprip	0	9.4	-6.256	6.05e-10	1.31e-08	TRUE	8.9151
Phactr4	0	9.4	-6.256	6.36e-10	1.37e-08	TRUE	10.9559
2007-09-01	0	9.3	-6.241	8.65e-10	1.83e-08	TRUE	#N/A
Strn4	0	8.8	-6.153	2.57e-09	5.23e-08	TRUE	8.6998
Clasp1	0	8.7	-6.145	3.14e-09	6.13e-08	TRUE	8.2191
Fblim1	0	8.4	-6.098	5.34e-09	1.01e-07	TRUE	8.1176
Stmn1	0	8.3	-6.074	6.11e-09	1.14e-07	TRUE	8.626
Strn3	0	8.2	-6.066	6.81e-09	1.25e-07	TRUE	#N/A
Rassf8	0	7.9	-5.999	1.7e-08	2.94e-07	TRUE	6.6532
Arhgap35	0	7.6	-5.947	2.83e-08	4.75e-07	TRUE	#N/A
Eps15	0	7.4	-5.903	4.36e-08	7.16e-07	TRUE	7.3344
Cd2ap	0	7.3	-5.884	5.89e-08	9.41e-07	TRUE	7.0758
Samhd1	0	7	-5.828	1.03e-07	1.59e-06	TRUE	8.6422
Atp6v1b2	0	6.7	-5.76	1.93e-07	2.73e-06	TRUE	11.0252
Picalm	0	6.4	-5.708	3.21e-07	4.42e-06	TRUE	7.0736
Klc2	0	6.2	-5.656	5.07e-07	6.79e-06	TRUE	6.8795
Mia3	0	5.9	-5.601	8.17e-07	1.03e-05	TRUE	7.1294
Mkl2	0	5.8	-5.566	1.18e-06	1.41e-05	TRUE	6.91
Ptpn12	0	5.8	-5.566	1.18e-06	1.41e-05	TRUE	8.1576
Anxa6	0	5.4	-5.471	4.09e-06	4.46e-05	TRUE	7.7838
Anks1a	0	5.3	-5.434	3.32e-06	3.69e-05	TRUE	#N/A
Ints9	0	5.3	-5.434	3.32e-06	3.69e-05	TRUE	7.6471
Pls3	0	5.3	-5.434	3.41e-06	3.77e-05	TRUE	9.2176
Osbpl11	0	5	-5.37	5.4e-06	5.71e-05	TRUE	7.5831
Igf2r	0	5	-5.37	5.42e-06	5.71e-05	TRUE	10.491
Palm	0	5	-5.37	5.42e-06	5.71e-05	TRUE	9.7959
Syap1	0	5	-5.37	5.43e-06	5.71e-05	TRUE	8.4504
Agfg1	0	5	-5.357	6.02e-06	6.13e-05	TRUE	9.5195
Arhgap1	0	5	-5.357	6.02e-06	6.13e-05	TRUE	10.0337
Ddx6	0	5	-5.357	6.02e-06	6.13e-05	TRUE	10.2338
Wasf2	0	4.9	-5.343	6.76e-06	6.79e-05	TRUE	9.9249
Cobll1	1.4	60.1	-5.334	3.74e-40	7.83e-38	TRUE	6.8657
Stat3	0	4.9	-5.329	7.74e-06	7.71e-05	TRUE	8.8424
Dst	0.3	18.3	-5.306	8.76e-16	4.69e-14	TRUE	7.1613
Pip4k2c	0	4.8	-5.289	9.86e-06	9.61e-05	TRUE	9.3495
Dctn4	0	4.7	-5.275	1.09e-05	0.0001056	TRUE	9.8603
Tes	0	4.7	-5.275	1.09e-05	0.0001056	TRUE	11.2285
Ttll12	0	4.7	-5.275	1.1e-05	0.0001056	TRUE	#N/A
Dync1li2	0	4.7	-5.26	1.23e-05	0.0001175	TRUE	8.5448
Ppp1r12a	0	4.6	-5.246	1.4e-05	0.0001334	TRUE	9.4236
Golga4	0	4.4	-5.188	1.99e-05	0.0001791	TRUE	6.9784
Pgrmc2	0	4.4	-5.188	1.99e-05	0.0001791	TRUE	9.2929
Htatsf1	0	4.4	-5.173	2.22e-05	0.0001983	TRUE	11.2857
Synrg	0	4.4	-5.172	2.24e-05	0.0001986	TRUE	#N/A
Baiap2	0	4.3	-5.157	2.51e-05	0.0002205	TRUE	7.0451
Polr2m	0	4.3	-5.157	2.51e-05	0.0002205	TRUE	#N/A
Sptbn1	0	4.3	-5.157	2.51e-05	0.0002205	TRUE	#N/A
Ptpn11	0.4	17.4	-5.147	6.03e-15	3.02e-13	TRUE	12.6204
Plekho2	0	4.2	-5.112	3.3e-05	0.0002841	TRUE	7.3406
Myo1e	0	4.2	-5.112	3.33e-05	0.0002842	TRUE	8.2017
Ccdc25	0	4.1	-5.096	3.65e-05	0.0003047	TRUE	6.8609
Ptk2	0	4.1	-5.096	3.65e-05	0.0003047	TRUE	10.7433
Slain2	0	4.1	-5.079	4.06e-05	0.0003315	TRUE	8.7187
Asap1	0	4.1	-5.079	4.06e-05	0.0003315	TRUE	#N/A
Map7d1	0	4.1	-5.079	4.06e-05	0.0003315	TRUE	#N/A
Stam	0	4.1	-5.079	4.06e-05	0.0003315	TRUE	7.0089
Dip2a	0	3.9	-4.997	6.69e-05	0.0005287	TRUE	6.6318
Reps1	0	3.8	-4.979	7.43e-05	0.0005737	TRUE	10.721
Scrib	0	3.8	-4.962	8.32e-05	0.0006321	TRUE	9.7577
Stk24	0	3.6	-4.891	0.000123	0.0008902	TRUE	7.8937
Tpm1	0	3.6	-4.891	0.000123	0.0008902	TRUE	11.4954
Chmp5	0	3.6	-4.891	0.0001235	0.0008907	TRUE	6.881
Dock1	0	3.5	-4.872	0.0001366	0.0009741	TRUE	7.4458
Synpo	0	3.5	-4.872	0.0001367	0.0009741	TRUE	9.6687
Esyt1	0	3.4	-4.817	0.0001882	0.001292	TRUE	#N/A
Ppp4r3b	0	3.4	-4.814	0.000197	0.00134	TRUE	#N/A
Itsn1	0.3	12.8	-4.793	6.73e-11	1.84e-09	TRUE	6.8508
Tpp2	0	3.3	-4.756	0.0002521	0.001639	TRUE	8.9887
Golga3	0	3.3	-4.756	0.0002525	0.001639	TRUE	8.259
Diaph2	0	3.3	-4.756	0.0002529	0.001639	TRUE	#N/A
Rb1cc1	0	3.3	-4.756	0.0002529	0.001639	TRUE	6.7732
Eef2k	0	3.2	-4.736	0.000281	0.001791	TRUE	7.8714
Prkar2a	0	3.2	-4.714	0.0003149	0.001985	TRUE	6.7912
Spag9	0.3	12.1	-4.707	1.63e-10	4.12e-09	TRUE	7.9258
Tkt	0	3.1	-4.693	0.00036	0.002227	TRUE	12.2387
Tpd52l2	0	3	-4.652	0.0004214	0.002552	TRUE	9.0241
Golga5	0	3	-4.63	0.0004673	0.002796	TRUE	7.5793
Smcr8	0	3	-4.63	0.0004673	0.002796	TRUE	6.9078
Dync1i2	0	3	-4.63	0.0004677	0.002796	TRUE	11.2684
Ciapin1	0.4	12.1	-4.626	1.92e-10	4.66e-09	TRUE	12.3454
Acbd3	0	2.9	-4.608	0.0005203	0.003041	TRUE	8.7919
Nudt21	0	2.9	-4.608	0.0005203	0.003041	TRUE	11.3286
Tab2	0	2.9	-4.608	0.0005203	0.003041	TRUE	#N/A
Zfand3	0	2.9	-4.608	0.0005209	0.003041	TRUE	11.3994
Cic	0	2.9	-4.584	0.000586	0.00333	TRUE	7.8008
Syne2	0.3	11	-4.572	1e-08	1.77e-07	TRUE	6.9413
Arhgef18	0	2.8	-4.561	0.0006581	0.003649	TRUE	9.7259
Tpm3	0	2.7	-4.517	0.0007847	0.004209	TRUE	8.8591
Camk1d	0	2.7	-4.492	0.0008702	0.004614	TRUE	7.0038
Nme2	0	2.7	-4.492	0.0008725	0.004615	TRUE	13.5758
Cluh	0.4	10.8	-4.467	2.42e-09	4.97e-08	TRUE	#N/A
Eif3j1	0	2.6	-4.467	0.0009684	0.005035	TRUE	#N/A
Arhgef1	0	2.6	-4.467	0.0009693	0.005035	TRUE	7.9628
Nudt5	0	2.6	-4.467	0.0009693	0.005035	TRUE	10.6616
Tmf1	0	2.6	-4.467	0.0009738	0.005046	TRUE	6.9004
Tcea1	0	2.6	-4.442	0.001082	0.005512	TRUE	6.7518
Wwc2	0	2.6	-4.442	0.001083	0.005512	TRUE	11.4727
Fermt2	0	2.5	-4.416	0.001214	0.0061	TRUE	11.7527
Pex14	0	2.4	-4.34	0.001633	0.007892	TRUE	9.407
Acly	0	2.4	-4.312	0.001813	0.008501	TRUE	13.0633
Ctage5	0	2.4	-4.312	0.001813	0.008501	TRUE	10.3318
Fam114a2	0	2.4	-4.312	0.001813	0.008501	TRUE	9.7354
Naa30	0	2.4	-4.312	0.001813	0.008501	TRUE	#N/A
Paf1	0	2.4	-4.312	0.001813	0.008501	TRUE	9.2466
Pcmt1	0	2.4	-4.312	0.001813	0.008501	TRUE	9.6752
Ralgapa1	0	2.4	-4.312	0.001813	0.008501	TRUE	#N/A
Ric8a	0	2.4	-4.312	0.001813	0.008501	TRUE	#N/A
Rbm12	0	2.4	-4.312	0.001814	0.008501	TRUE	9.6142
Dync1li1	0	2.3	-4.283	0.002025	0.009302	TRUE	7.1714
Specc1l	0	2.3	-4.254	0.002267	0.0103	TRUE	12.0152
Aftph	0	2.3	-4.254	0.002273	0.0103	TRUE	9.5948
S100a4	0	2.3	-4.254	0.002273	0.0103	TRUE	6.9459
Rock2	0.3	8.6	-4.221	1.43e-07	2.12e-06	TRUE	6.8557
Strn	0.4	8.8	-4.173	1.15e-07	1.75e-06	TRUE	7.3804
Add3	0	2.1	-4.168	0.003068	0.01337	TRUE	9.3516
Usp5	0	2.1	-4.168	0.003075	0.01338	TRUE	8.6737
Ap3b1	0	2.1	-4.137	0.003416	0.01441	TRUE	7.04
Arhgap21	0	2.1	-4.137	0.003416	0.01441	TRUE	10.2236
Ints4	0	2.1	-4.137	0.003416	0.01441	TRUE	9.6488
Sec23ip	0	2.1	-4.137	0.003416	0.01441	TRUE	7.0518
Tsc1	0	2.1	-4.137	0.003416	0.01441	TRUE	7.3151
Uprt	0	2.1	-4.137	0.003416	0.01441	TRUE	6.7076
Coro1c	0	2.1	-4.137	0.003419	0.01441	TRUE	12.3077
Usp8	0	2.1	-4.137	0.003419	0.01441	TRUE	6.9642
Dnm1l	0.3	8	-4.116	4.71e-07	6.34e-06	TRUE	9.3648
Myo5a	0.3	7.9	-4.108	6.24e-07	8.25e-06	TRUE	8.1198
Trim47	0	2	-4.106	0.003815	0.01579	TRUE	6.6716
Bcat1	0	2	-4.105	0.003814	0.01579	TRUE	12.137
Nup62	0	2	-4.105	0.003814	0.01579	TRUE	11.7188
Sympk	0	2	-4.105	0.003814	0.01579	TRUE	8.5621
Tacc1	0	2	-4.105	0.003814	0.01579	TRUE	7.7832
Dcp1a	0	2	-4.073	0.004268	0.01734	TRUE	9.6168
Mkl1	0	2	-4.073	0.004268	0.01734	TRUE	6.7653
Tdp1	0	2	-4.073	0.004268	0.01734	TRUE	7.8903
Fam91a1	0	2	-4.072	0.004272	0.01734	TRUE	#N/A
Ston1	0	2	-4.072	0.004288	0.01737	TRUE	#N/A
Tanc1	0	1.8	-3.975	0.005821	0.0227	FALSE	7.492
Cgnl1	0	1.8	-3.939	0.00649	0.0248	FALSE	6.9319
Ate1	0	1.8	-3.939	0.00649	0.0248	FALSE	10.1724
Dlgap4	0	1.8	-3.939	0.00649	0.0248	FALSE	9.056
Vapb	0	1.8	-3.939	0.00649	0.0248	FALSE	10.7553
Zfyve16	0	1.8	-3.939	0.00649	0.0248	FALSE	7.177
Clip1	0.7	12.3	-3.936	2.23e-09	4.62e-08	TRUE	8.1884
Aacs	0.4	7.5	-3.934	1.58e-06	1.86e-05	TRUE	9.2846
Ank3	0	1.7	-3.902	0.007248	0.02675	FALSE	8.3875
Cdc42ep4	0	1.7	-3.902	0.007248	0.02675	FALSE	10.2431
Ehbp1l1	0	1.7	-3.902	0.007248	0.02675	FALSE	7.0063
Irs2	0	1.7	-3.902	0.007248	0.02675	FALSE	8.8457
Naa50	0	1.7	-3.902	0.007248	0.02675	FALSE	#N/A
Specc1	0	1.7	-3.902	0.007248	0.02675	FALSE	9.5376
Zw10	0	1.7	-3.902	0.007248	0.02675	FALSE	8.0347
Cit	0	1.7	-3.902	0.007255	0.02675	FALSE	8.0734
Commd3	0	1.7	-3.902	0.007255	0.02675	FALSE	9.2914
Lzic	0	1.7	-3.902	0.007255	0.02675	FALSE	8.7453
Pacsin2	0	1.7	-3.902	0.007255	0.02675	FALSE	7.4768
Ppfibp1	0	1.7	-3.902	0.007255	0.02675	FALSE	6.8611
Phldb1	0.3	6.8	-3.899	4.34e-06	4.68e-05	TRUE	9.2036
Fubp1	0.4	7.2	-3.888	2.55e-06	2.94e-05	TRUE	7.9428
Gsn	1.1	17.3	-3.881	5.5e-12	1.69e-10	TRUE	6.7931
Comt	0	1.7	-3.865	0.008115	0.02932	FALSE	9.1541
Inpp5f	0	1.7	-3.864	0.008114	0.02932	FALSE	8.8535
Lats1	0	1.7	-3.864	0.008114	0.02932	FALSE	6.9122
Vasp	0	1.7	-3.864	0.008114	0.02932	FALSE	7.1278
Ccdc6	0	1.7	-3.864	0.00813	0.02932	FALSE	8.4624
Tnrc6c	0	1.7	-3.864	0.00813	0.02932	FALSE	9.5024
Rai14	4.9	72.9	-3.858	1.15e-45	3.29e-43	TRUE	11.017
Lima1	1.1	17.3	-3.85	3.05e-12	1.02e-10	TRUE	10.1701
Cast	2.5	36.3	-3.806	5.66e-23	5.21e-21	TRUE	6.7321
Vcl	1.4	21.1	-3.773	1.18e-13	5.05e-12	TRUE	9.8671
Eps15l1	1.1	15.9	-3.768	2.06e-11	5.94e-10	TRUE	9.4744
Pla2g4a	1	15.4	-3.756	1.11e-10	2.9e-09	TRUE	6.6671
Snx6	0	1.5	-3.709	0.01246	0.04265	FALSE	8.8236
Lrrfip1	1.4	20.1	-3.708	9.02e-14	3.99e-12	TRUE	7.9937
Camk1	0	1.5	-3.708	0.01247	0.04265	FALSE	7.7995
Gphn	0	1.5	-3.708	0.01247	0.04265	FALSE	8.1589
Cmtr1	0	1.5	-3.666	0.01392	0.04614	FALSE	#N/A
Scyl2	0	1.5	-3.666	0.01393	0.04614	FALSE	6.7291
Cat	0	1.5	-3.666	0.01395	0.04614	FALSE	7.6868
Pabpn1	0	1.5	-3.666	0.01395	0.04614	FALSE	12.754
Sh3bp2	0	1.5	-3.666	0.01395	0.04614	FALSE	10.2019
Srgap2	0	1.5	-3.666	0.01395	0.04614	FALSE	7.4355
Stk4	0	1.5	-3.666	0.01395	0.04614	FALSE	8.6578
Triobp	0	1.5	-3.666	0.01395	0.04614	FALSE	10.7022
Uba3	0	1.5	-3.666	0.01395	0.04614	FALSE	#N/A
Znf830	0	1.5	-3.666	0.01395	0.04614	FALSE	#N/A
Pola2	0	1.5	-3.665	0.01396	0.04614	FALSE	10.7718
Edc4	1.9	25.3	-3.642	3.11e-16	1.88e-14	TRUE	9.9659
Sltm	0	1.4	-3.622	0.01558	0.05017	FALSE	9.3103
Usp16	0	1.4	-3.622	0.01558	0.05017	FALSE	7.3128
Add1	0	1.4	-3.621	0.0156	0.05017	FALSE	10.8073
Cbl	0	1.4	-3.621	0.0156	0.05017	FALSE	6.7349
Ncoa5	0	1.4	-3.621	0.0156	0.05017	FALSE	10.9764
Parg	0	1.4	-3.621	0.0156	0.05017	FALSE	6.9452
Tagln	0	1.4	-3.621	0.0156	0.05017	FALSE	6.8547
Nexn	0	1.4	-3.621	0.01561	0.05017	FALSE	6.8107
Uso1	0.3	5.6	-3.607	5.17e-05	0.0004128	TRUE	7.8609
Dennd4c	0.3	5.4	-3.559	7.33e-05	0.000568	TRUE	6.8128
Dock7	1.4	18	-3.544	5.24e-12	1.63e-10	TRUE	6.8025
Ccdc22	0.4	5.6	-3.52	6.26e-05	0.0004968	TRUE	#N/A
Wars	0.8	10.5	-3.479	9.93e-08	1.54e-06	TRUE	10.5626
Mgea5	0.4	5.4	-3.472	8.91e-05	0.0006745	TRUE	7.2875
Calm1	0.4	5.3	-3.447	0.0001075	0.0007952	TRUE	6.6591
Nbea	0	1.2	-3.435	0.02419	0.07255	FALSE	6.9369
Ndrg1	0	1.2	-3.435	0.02419	0.07255	FALSE	7.1944
Cdk7	0	1.2	-3.435	0.02421	0.07255	FALSE	8.008
Chtf18	0	1.2	-3.435	0.02421	0.07255	FALSE	12.1958
Fkbp15	0	1.2	-3.435	0.02421	0.07255	FALSE	6.6948
Lrp1	0	1.2	-3.435	0.02421	0.07255	FALSE	7.3599
Nisch	0	1.2	-3.435	0.02421	0.07255	FALSE	13.4668
Rps17	0	1.2	-3.435	0.02421	0.07255	FALSE	#N/A
Vapa	0	1.2	-3.435	0.02421	0.07255	FALSE	8.6884
Ywhaz	0	1.2	-3.435	0.02421	0.07255	FALSE	11.1458
Snx5	0.3	4.8	-3.388	0.0002419	0.001599	TRUE	7.4599
Apbb1ip	0	1.2	-3.383	0.02714	0.07854	FALSE	6.7314
Bub1b	0	1.2	-3.383	0.02714	0.07854	FALSE	10.855
Ccdc85c	0	1.2	-3.383	0.02714	0.07854	FALSE	#N/A
Cdk12	0	1.2	-3.383	0.02714	0.07854	FALSE	#N/A
Cyb5a	0	1.2	-3.383	0.02714	0.07854	FALSE	#N/A
Ehbp1	0	1.2	-3.383	0.02714	0.07854	FALSE	8.019
Fam114a1	0	1.2	-3.383	0.02714	0.07854	FALSE	#N/A
Gcc2	0	1.2	-3.383	0.02714	0.07854	FALSE	8.4526
Sf3b3	0	1.2	-3.383	0.02714	0.07854	FALSE	10.307
Tpm4	0	1.2	-3.383	0.02714	0.07854	FALSE	11.9441
Ttc9c	0	1.2	-3.383	0.02714	0.07854	FALSE	9.9166
Ywhae	0	1.2	-3.383	0.02714	0.07854	FALSE	7.2877
Abi1	0.4	5	-3.382	0.0001686	0.001172	TRUE	9.4488
Arhgap5	0	1.2	-3.382	0.02717	0.07854	FALSE	6.7231
Unc45a	0	1.2	-3.382	0.02717	0.07854	FALSE	10.7178
Prune	1.4	15.9	-3.369	2e-10	4.78e-09	TRUE	9.7626
Pdcl3	0	1.1	-3.329	0.03045	0.08468	FALSE	7.2001
Atf7ip	0	1.1	-3.328	0.03048	0.08468	FALSE	9.3604
Cep152	0	1.1	-3.328	0.03048	0.08468	FALSE	9.6409
Ftl1	0	1.1	-3.328	0.03048	0.08468	FALSE	12.0999
Gripap1	0	1.1	-3.328	0.03048	0.08468	FALSE	9.2974
Map3k2	0	1.1	-3.328	0.03048	0.08468	FALSE	6.846
Sh3rf1	0	1.1	-3.328	0.03048	0.08468	FALSE	10.9512
Ykt6	0	1.1	-3.328	0.03048	0.08468	FALSE	10.328
Ppp1r13l	0	1.1	-3.328	0.03051	0.08468	FALSE	7.1197
Smg6	0	1.1	-3.328	0.03051	0.08468	FALSE	8.3179
Syne1	0	1.1	-3.328	0.03051	0.08468	FALSE	6.7528
Kif5b	2.8	28.9	-3.327	3.44e-17	2.26e-15	TRUE	7.1666
Akap2	2.4	24.9	-3.311	3.38e-15	1.73e-13	TRUE	7.755
Papola	0.3	4.4	-3.287	0.0004604	0.002773	TRUE	8.3206
Wnk1	2.8	28	-3.282	2.57e-16	1.6e-14	TRUE	10.2151
Gapvd1	1.1	11.3	-3.272	9.08e-08	1.44e-06	TRUE	10.1614
Heatr5a	0.3	4.4	-3.272	0.0005084	0.003007	TRUE	7.5815
Akap9	1.1	11	-3.242	1.33e-07	1.98e-06	TRUE	10.8756
Rdx	1.7	16.6	-3.228	1.81e-10	4.51e-09	TRUE	6.7029
Sars	0.5	5.6	-3.226	0.000118	0.0008591	TRUE	9.1272
Ptpn23	2.7	25.8	-3.221	7.57e-15	3.63e-13	TRUE	7.0152
Dctn1	1.2	12.2	-3.219	3.37e-08	5.62e-07	TRUE	6.8977
Hgs	0.4	4.4	-3.185	0.0006083	0.003414	TRUE	8.5873
Pak3	0.8	8.5	-3.181	3.54e-06	3.88e-05	TRUE	7.3153
Fnbp4	0.3	4.1	-3.178	0.0008776	0.004631	TRUE	7.0251
Ppp1r18	0.8	8.2	-3.125	6.64e-06	6.7e-05	TRUE	#N/A
U2af2	0.4	4.2	-3.124	0.0008679	0.004612	TRUE	8.2317
Txnrd1	1.1	10.3	-3.113	6.01e-07	8e-06	TRUE	6.8476
Ehd1	0.4	4.1	-3.108	0.0009467	0.004971	TRUE	8.2457
Tln2	1.9	17.3	-3.1	1.91e-10	4.66e-09	TRUE	7.1657
Lasp1	1.1	9.9	-3.094	9.91e-07	1.22e-05	TRUE	12.5003
Prpf4	0.4	4.1	-3.092	0.001041	0.005337	TRUE	8.0561
Dab2	3	25.7	-3.064	3.91e-13	1.53e-11	TRUE	9.3145
Nedd4	2.4	20.7	-3.04	7.03e-12	2.13e-10	TRUE	8.3166
Lrch3	0	0.9	-3.03	0.0539	0.1335	FALSE	6.9921
Slc3a2	0	0.9	-3.03	0.0539	0.1335	FALSE	6.9231
Slmap	0	0.9	-3.03	0.0539	0.1335	FALSE	9.7502
Abl2	0	0.9	-3.03	0.05395	0.1335	FALSE	6.658
Adsl	0	0.9	-3.03	0.05395	0.1335	FALSE	9.2613
Ankle2	0	0.9	-3.03	0.05395	0.1335	FALSE	9.2238
Ano6	0	0.9	-3.03	0.05395	0.1335	FALSE	6.8604
Atg3	0	0.9	-3.03	0.05395	0.1335	FALSE	7.3635
Bag2	0	0.9	-3.03	0.05395	0.1335	FALSE	7.0956
Ccdc47	0	0.9	-3.03	0.05395	0.1335	FALSE	8.5103
Ccs	0	0.9	-3.03	0.05395	0.1335	FALSE	11.4763
Cnot3	0	0.9	-3.03	0.05395	0.1335	FALSE	8.1794
Dmd	0	0.9	-3.03	0.05395	0.1335	FALSE	6.6986
Erh	0	0.9	-3.03	0.05395	0.1335	FALSE	13.0227
Evc2	0	0.9	-3.03	0.05395	0.1335	FALSE	8.7313
Farsb	0	0.9	-3.03	0.05395	0.1335	FALSE	12.8309
Fgd1	0	0.9	-3.03	0.05395	0.1335	FALSE	9.2494
Hook3	0	0.9	-3.03	0.05395	0.1335	FALSE	8.3567
Hypk	0	0.9	-3.03	0.05395	0.1335	FALSE	#N/A
Nampt	0	0.9	-3.03	0.05395	0.1335	FALSE	7.5542
Pald1	0	0.9	-3.03	0.05395	0.1335	FALSE	#N/A
Ppm1a	0	0.9	-3.03	0.05395	0.1335	FALSE	10.4987
Ptms	0	0.9	-3.03	0.05395	0.1335	FALSE	7.0711
Rnf135	0	0.9	-3.03	0.05395	0.1335	FALSE	8.457
Sde2	0	0.9	-3.03	0.05395	0.1335	FALSE	#N/A
Slc7a6os	0	0.9	-3.03	0.05395	0.1335	FALSE	7.3768
Tbc1d10b	0	0.9	-3.03	0.05395	0.1335	FALSE	7.2184
Tle3	0	0.9	-3.03	0.05395	0.1335	FALSE	7.3019
Uba2	0	0.9	-3.03	0.05395	0.1335	FALSE	10.7134
Calu	0	0.9	-3.029	0.05401	0.1335	FALSE	9.7165
Ppp4r3a	1.4	12.3	-3.025	1.27e-07	1.92e-06	TRUE	#N/A
Pask	1	9.2	-3.025	5.82e-06	6.03e-05	TRUE	6.9611
Bcar1	0.7	6.5	-3.025	7.12e-05	0.0005554	TRUE	8.8588
Bicd2	1.1	9.4	-3.011	2.57e-06	2.94e-05	TRUE	9.8029
Twf1	0.3	3.6	-2.99	0.002383	0.01073	TRUE	#N/A
Puf60	2.1	17.2	-2.985	4.37e-10	9.67e-09	TRUE	13.4424
Ppp6r3	0.7	6.5	-2.975	8.18e-05	0.0006271	TRUE	#N/A
Dlg1	1.2	10.3	-2.972	1.06e-06	1.3e-05	TRUE	6.7499
Ube2o	0.3	3.5	-2.972	0.002652	0.01185	TRUE	11.1342
Clip2	0	0.8	-2.961	0.06078	0.1439	FALSE	6.9899
Commd2	0	0.8	-2.961	0.06078	0.1439	FALSE	6.9198
Dusp12	0	0.8	-2.961	0.06078	0.1439	FALSE	6.6862
Egln1	0	0.8	-2.961	0.06078	0.1439	FALSE	6.8592
Fgfr1op	0	0.8	-2.961	0.06078	0.1439	FALSE	8.3824
Papss1	0	0.8	-2.961	0.06078	0.1439	FALSE	9.7878
Parva	0	0.8	-2.961	0.06078	0.1439	FALSE	8.5428
Pdcd5	0	0.8	-2.961	0.06078	0.1439	FALSE	8.2759
Pikfyve	0	0.8	-2.961	0.06078	0.1439	FALSE	#N/A
Psmd8	0	0.8	-2.961	0.06078	0.1439	FALSE	12.0821
Setd7	0	0.8	-2.961	0.06078	0.1439	FALSE	8.7631
Snrpf	0	0.8	-2.961	0.06078	0.1439	FALSE	13.4908
Tab1	0	0.8	-2.961	0.06078	0.1439	FALSE	#N/A
Taf6	0	0.8	-2.961	0.06078	0.1439	FALSE	7.9854
Twf2	0	0.8	-2.961	0.06078	0.1439	FALSE	9.2118
Ubxn1	0	0.8	-2.961	0.06078	0.1439	FALSE	11.626
Uimc1	0	0.8	-2.961	0.06078	0.1439	FALSE	6.8818
Abcc10	0	0.8	-2.96	0.06084	0.1439	FALSE	7.5115
Arhgap32	0	0.8	-2.96	0.06084	0.1439	FALSE	#N/A
Bud13	0	0.8	-2.96	0.06084	0.1439	FALSE	9.9675
Ccdc102a	0	0.8	-2.96	0.06084	0.1439	FALSE	6.942
Copz1	0	0.8	-2.96	0.06084	0.1439	FALSE	10.6073
Dicer1	0	0.8	-2.96	0.06084	0.1439	FALSE	9.5823
Dock8	0	0.8	-2.96	0.06084	0.1439	FALSE	6.9751
Numb	0	0.8	-2.96	0.06084	0.1439	FALSE	9.7743
Trim33	0	0.8	-2.96	0.06084	0.1439	FALSE	8.8458
Wac	0.3	3.5	-2.952	0.002908	0.01282	TRUE	#N/A
Nup98	1.1	9.1	-2.94	4.34e-06	4.68e-05	TRUE	8.2569
Snx4	0.7	6.2	-2.911	0.0001382	0.0009815	TRUE	9.5244
Ankrd28	0.4	3.6	-2.903	0.002795	0.01239	TRUE	9.3867
Sh3kbp1	5.1	38.4	-2.896	1.44e-19	1.1e-17	TRUE	8.3371
Fam107b	0.4	3.5	-2.884	0.003068	0.01337	TRUE	#N/A
Anxa5	0.4	3.5	-2.884	0.003085	0.01338	TRUE	8.1966
Plin3	6.9	50.1	-2.839	3e-24	3.45e-22	TRUE	#N/A
Tln1	29.8	210.7	-2.815	9.15e-35	1.4e-32	TRUE	6.6826
Arfgap1	2.3	16.7	-2.807	3.13e-09	6.13e-08	TRUE	9.2499
Swap70	6.2	44	-2.805	6.06e-20	4.81e-18	TRUE	9.3367
Wipi2	1.1	8.3	-2.801	1.85e-05	0.0001697	TRUE	8.7893
Pfkl	0.3	3.1	-2.773	0.006499	0.0248	TRUE	12.4771
Hbs1l	0.4	3.3	-2.769	0.005262	0.02073	TRUE	10.8512
Pebp1	0.8	6.3	-2.755	0.0001844	0.00127	TRUE	9.2319
Dbnl	3.2	21.7	-2.73	3.68e-11	1.05e-09	TRUE	9.0525
Nudt9	0.3	2.9	-2.707	0.00852	0.03054	TRUE	9.2371
Eif3h	0.4	3.1	-2.706	0.007102	0.02675	TRUE	7.5499
Gspt1	0.7	5.5	-2.702	0.0005286	0.003071	TRUE	13.3124
Sec31a	2.6	17.6	-2.691	2.65e-09	5.34e-08	TRUE	7.8991
Msn	4.2	27.8	-2.68	2.61e-13	1.04e-11	TRUE	7.7925
Psmd11	0.4	3	-2.665	0.008232	0.02964	TRUE	7.9409
Ubfd1	0.4	2.9	-2.62	0.009872	0.03468	TRUE	10.4092
Eftud1	0.8	5.7	-2.611	0.000536	0.003075	TRUE	8.541
Map1b	22	133.4	-2.591	3.1e-51	1.19e-48	TRUE	#N/A
Ezr	1.7	10.4	-2.563	6e-06	6.13e-05	TRUE	#N/A
Alms1	0	0.6	-2.563	0.1106	0.233	FALSE	7.316
Ampd3	0	0.6	-2.563	0.1106	0.233	FALSE	6.7111
Cul3	0	0.6	-2.563	0.1106	0.233	FALSE	11.0373
Dpysl4	0	0.6	-2.563	0.1106	0.233	FALSE	10.5952
Eea1	0	0.6	-2.563	0.1106	0.233	FALSE	6.7534
Evi5	0	0.6	-2.563	0.1106	0.233	FALSE	9.6662
Heatr5b	0	0.6	-2.563	0.1106	0.233	FALSE	6.9665
Med13	0	0.6	-2.563	0.1106	0.233	FALSE	6.9509
Necap1	0	0.6	-2.563	0.1106	0.233	FALSE	9.0442
Nfkb2	0	0.6	-2.563	0.1106	0.233	FALSE	6.9194
Ppl	0	0.6	-2.563	0.1106	0.233	FALSE	6.9966
Rab3gap1	0	0.6	-2.563	0.1106	0.233	FALSE	10.2984
Ssr4	0	0.6	-2.563	0.1106	0.233	FALSE	12.7129
Alyref	0	0.6	-2.562	0.1107	0.233	FALSE	#N/A
Apobr	0	0.6	-2.562	0.1107	0.233	FALSE	#N/A
Arl6ip5	0	0.6	-2.562	0.1107	0.233	FALSE	7.9788
Cnot2	0	0.6	-2.562	0.1107	0.233	FALSE	11.2793
Dclk1	0	0.6	-2.562	0.1107	0.233	FALSE	7.2395
Dock9	0	0.6	-2.562	0.1107	0.233	FALSE	6.9939
Gga1	0	0.6	-2.562	0.1107	0.233	FALSE	8.1353
Grb14	0	0.6	-2.562	0.1107	0.233	FALSE	6.8063
Map1s	0	0.6	-2.562	0.1107	0.233	FALSE	#N/A
Mastl	0	0.6	-2.562	0.1107	0.233	FALSE	6.7275
Mical3	0	0.6	-2.562	0.1107	0.233	FALSE	6.8483
Morc2a	0	0.6	-2.562	0.1107	0.233	FALSE	11.3827
Pard3	0	0.6	-2.562	0.1107	0.233	FALSE	7.0904
Rab11fip2	0	0.6	-2.562	0.1107	0.233	FALSE	6.7199
Sos1	0	0.6	-2.562	0.1107	0.233	FALSE	6.7945
Suclg1	0	0.6	-2.562	0.1107	0.233	FALSE	12.6351
Tbc1d5	0	0.6	-2.562	0.1107	0.233	FALSE	8.6291
Trip6	0	0.6	-2.562	0.1107	0.233	FALSE	10.495
Uba6	0	0.6	-2.562	0.1107	0.233	FALSE	6.7053
Ubap1	0	0.6	-2.562	0.1107	0.233	FALSE	9.2577
Wnt8a	0	0.6	-2.562	0.1107	0.233	FALSE	6.7292
Rtcb	1.1	6.7	-2.541	0.0002376	0.001575	TRUE	#N/A
Mtmr6	1.4	8.8	-2.528	3.36e-05	0.0002849	TRUE	6.6748
Tjp1	6.7	39.1	-2.516	7.38e-15	3.61e-13	TRUE	7.3356
Sod1	0.7	4.7	-2.516	0.001998	0.009233	TRUE	13.355
Pak2	4.1	23.7	-2.501	5.19e-11	1.44e-09	TRUE	7.053
Smap1	1.1	6.5	-2.491	0.0003474	0.002155	TRUE	#N/A
Ryr2	0.4	2.6	-2.48	0.01684	0.05338	FALSE	6.8045
2002-09-01	1.6	9.3	-2.479	2.7e-05	0.0002357	TRUE	#N/A
Aldh3a2	0	0.6	-2.465	0.1256	0.2498	FALSE	8.5741
Aldh9a1	0	0.6	-2.465	0.1256	0.2498	FALSE	6.6157
Arhgap17	0	0.6	-2.465	0.1256	0.2498	FALSE	10.5016
Camlg	0	0.6	-2.465	0.1256	0.2498	FALSE	#N/A
Capza1	0	0.6	-2.465	0.1256	0.2498	FALSE	6.9962
Ccz1	0	0.6	-2.465	0.1256	0.2498	FALSE	#N/A
Cops3	0	0.6	-2.465	0.1256	0.2498	FALSE	12.6051
Cwc27	0	0.6	-2.465	0.1256	0.2498	FALSE	#N/A
Dnajc17	0	0.6	-2.465	0.1256	0.2498	FALSE	8.4611
Eftud2	0	0.6	-2.465	0.1256	0.2498	FALSE	10.6576
Ewsr1	0	0.6	-2.465	0.1256	0.2498	FALSE	6.7929
Fnbp1	0	0.6	-2.465	0.1256	0.2498	FALSE	11.2003
Fnbp1l	0	0.6	-2.465	0.1256	0.2498	FALSE	10.8475
Gab1	0	0.6	-2.465	0.1256	0.2498	FALSE	9.7876
Gltp	0	0.6	-2.465	0.1256	0.2498	FALSE	9.6086
Gng5	0	0.6	-2.465	0.1256	0.2498	FALSE	7.0134
Hdac6	0	0.6	-2.465	0.1256	0.2498	FALSE	7.5671
Hlcs	0	0.6	-2.465	0.1256	0.2498	FALSE	7.895
K0930	0	0.6	-2.465	0.1256	0.2498	FALSE	#N/A
Kdm1a	0	0.6	-2.465	0.1256	0.2498	FALSE	#N/A
Kiaa0754	0	0.6	-2.465	0.1256	0.2498	FALSE	#N/A
Kiaa1468	0	0.6	-2.465	0.1256	0.2498	FALSE	#N/A
Marcksl1	0	0.6	-2.465	0.1256	0.2498	FALSE	11.6102
N4bp1	0	0.6	-2.465	0.1256	0.2498	FALSE	#N/A
Otud7b	0	0.6	-2.465	0.1256	0.2498	FALSE	8.0977
Oxsr1	0	0.6	-2.465	0.1256	0.2498	FALSE	7.251
Paip1	0	0.6	-2.465	0.1256	0.2498	FALSE	6.8124
Pbk	0	0.6	-2.465	0.1256	0.2498	FALSE	10.7771
Pfdn6	0	0.6	-2.465	0.1256	0.2498	FALSE	#N/A
Plk1	0	0.6	-2.465	0.1256	0.2498	FALSE	12.5536
Praf2	0	0.6	-2.465	0.1256	0.2498	FALSE	#N/A
Rapgef2	0	0.6	-2.465	0.1256	0.2498	FALSE	7.3744
Rbm3	0	0.6	-2.465	0.1256	0.2498	FALSE	6.869
Rnf40	0	0.6	-2.465	0.1256	0.2498	FALSE	10.1968
Samd4a	0	0.6	-2.465	0.1256	0.2498	FALSE	#N/A
Setd3	0	0.6	-2.465	0.1256	0.2498	FALSE	7.7748
Sf3b6	0	0.6	-2.465	0.1256	0.2498	FALSE	#N/A
Sh3bp4	0	0.6	-2.465	0.1256	0.2498	FALSE	6.7151
Ska3	0	0.6	-2.465	0.1256	0.2498	FALSE	#N/A
Smc2	0	0.6	-2.465	0.1256	0.2498	FALSE	6.7008
Snrnp40	0	0.6	-2.465	0.1256	0.2498	FALSE	#N/A
Ssb	0	0.6	-2.465	0.1256	0.2498	FALSE	6.8796
Stau2	0	0.6	-2.465	0.1256	0.2498	FALSE	8.4963
Ten1	0	0.6	-2.465	0.1256	0.2498	FALSE	#N/A
Usp4	0	0.6	-2.465	0.1256	0.2498	FALSE	9.0683
Wash1	0	0.6	-2.465	0.1256	0.2498	FALSE	#N/A
Wdr3	0	0.6	-2.465	0.1256	0.2498	FALSE	6.921
Wdr60	0	0.6	-2.465	0.1256	0.2498	FALSE	8.3304
Zak	0	0.6	-2.465	0.1256	0.2498	FALSE	#N/A
Polr2a	0.7	4.3	-2.464	0.003204	0.01381	TRUE	8.3591
Aak1	5.1	28.4	-2.46	1.15e-12	4.08e-11	TRUE	7.0532
Tceb1	0.4	2.6	-2.454	0.0185	0.05768	FALSE	7.6677
Tjap1	2.3	13	-2.442	1.12e-06	1.36e-05	TRUE	10.1999
Ranbp9	0.3	2.4	-2.439	0.02289	0.06984	FALSE	6.976
Nck1	1.4	8.1	-2.436	0.0001165	0.0008509	TRUE	8.0429
Ppil4	0.7	4.4	-2.428	0.003275	0.01401	TRUE	6.7045
Stam2	3.5	19.1	-2.424	8.41e-09	1.52e-07	TRUE	6.9875
Flnb	24.6	131.4	-2.414	1.21e-21	1.07e-19	TRUE	8.6876
Tjp2	5	27.3	-2.413	3.99e-12	1.3e-10	TRUE	9.0622
Prkar2b	1.5	8.4	-2.413	9.56e-05	0.0007143	TRUE	10.0777
Eps8l2	2.7	15.1	-2.412	1.78e-07	2.58e-06	TRUE	6.7366
Snx9	2.2	12.1	-2.376	4.64e-06	4.99e-05	TRUE	6.9253
Arcn1	0.7	4.2	-2.368	0.004497	0.01812	TRUE	6.8157
Rtn4	29.8	153.4	-2.36	5.56e-16	3.05e-14	TRUE	6.8575
Capg	1.8	9.5	-2.329	4.2e-05	0.0003417	TRUE	7.1566
Ercc6l	0.4	2.4	-2.324	0.02872	0.08157	FALSE	#N/A
Sipa1	3.1	15.8	-2.301	2.91e-07	4.04e-06	TRUE	6.9781
Cdr2l	0.4	2.3	-2.296	0.03142	0.0867	FALSE	8.876
Ddx1	0.4	2.3	-2.296	0.03142	0.0867	FALSE	11.0514
Vwa5a	0.7	3.8	-2.268	0.008469	0.0304	TRUE	7.0537
Rin1	1.1	5.7	-2.259	0.00159	0.007719	TRUE	7.0246
Stat6	1.1	5.5	-2.257	0.001863	0.008676	TRUE	7.1389
Map4	24.1	115.7	-2.256	1.76e-20	1.45e-18	TRUE	#N/A
Nup50	2.3	11.2	-2.253	1.44e-05	0.0001365	TRUE	7.6802
Aars	1.5	7.4	-2.253	0.000363	0.002239	TRUE	11.7349
Dgcr8	0.3	2.1	-2.236	0.04287	0.1129	FALSE	8.9609
Fcho2	0.7	3.8	-2.235	0.008646	0.03089	TRUE	9.6468
Psme3	1.1	5.4	-2.234	0.002118	0.009707	TRUE	9.8361
Atp6v1a	0.9	4.5	-2.227	0.004895	0.01955	TRUE	7.486
Prmt7	3.5	16.8	-2.221	2.05e-07	2.87e-06	TRUE	11.4166
Kif15	1.8	8.8	-2.219	0.000131	0.0009392	TRUE	10.2613
Pcnt	1.2	5.9	-2.215	0.001495	0.007333	TRUE	8.3878
Myh3	0.9	4.4	-2.212	0.005296	0.02081	TRUE	6.8066
Safb	1.4	7	-2.205	0.0006067	0.003414	TRUE	10.6739
Prph	2.4	11.4	-2.186	1.9e-05	0.0001721	TRUE	6.8103
Nasp	7.6	34.5	-2.171	1.14e-12	4.08e-11	TRUE	11.4759
Gart	5.7	26	-2.161	3.39e-10	7.79e-09	TRUE	12.1132
Filip1l	2.8	13.2	-2.158	8.07e-06	8e-05	TRUE	#N/A
Elp4	3.5	15.9	-2.154	6.54e-07	8.6e-06	TRUE	6.6962
Micall2	3.1	14.4	-2.15	2.56e-06	2.94e-05	TRUE	7.7499
Ppip5k2	0.4	2.1	-2.15	0.04861	0.1258	FALSE	#N/A
Tpi1	0.4	2.1	-2.15	0.04861	0.1258	FALSE	13.3831
Nbn	0.7	3.6	-2.147	0.01295	0.04391	TRUE	6.7252
Mpp1	0.7	3.5	-2.128	0.01398	0.04614	TRUE	6.978
Pdcl	1.1	5	-2.119	0.00422	0.01728	TRUE	7.6428
Sf3a1	5.2	22.8	-2.115	4.83e-09	9.19e-08	TRUE	11.5118
Aldh18a1	0.3	1.9	-2.109	0.06119	0.1446	FALSE	9.648
Eif4b	13.9	60.2	-2.1	2.09e-19	1.55e-17	TRUE	7.381
Strap	2.3	10.3	-2.1	7.02e-05	0.0005495	TRUE	10.7134
Mllt4	16.8	72.5	-2.098	4.46e-24	4.67e-22	TRUE	10.5563
Bod1l	1.4	6.5	-2.097	0.001339	0.006664	TRUE	#N/A
Plrg1	0.4	2	-2.085	0.0584	0.1425	FALSE	13.1282
Msantd2	0.7	3.5	-2.079	0.01557	0.05017	FALSE	#N/A
Eef1d	2.4	10.5	-2.075	6.86e-05	0.0005403	TRUE	13.4243
Ylpm1	3.8	16.2	-2.065	1.3e-06	1.54e-05	TRUE	8.7713
Drg2	0.8	3.9	-2.064	0.01221	0.04194	TRUE	9.3715
Casp3	1.5	6.8	-2.062	0.001155	0.00583	TRUE	7.3044
Stk38	1.4	6.3	-2.045	0.001919	0.008886	TRUE	6.6509
Eps8	2.1	9.2	-2.042	0.0002163	0.001451	TRUE	6.7473
Zc3h4	3.3	14	-2.033	8.74e-06	8.63e-05	TRUE	#N/A
Inppl1	2.8	11.7	-2.029	3.67e-05	0.0003047	TRUE	12.7251
Cnot1	2.3	9.7	-2.006	0.0002039	0.001376	TRUE	7.4315
2009-09-01	9.9	39.9	-2.002	1.77e-13	7.4e-12	TRUE	#N/A
Ripk1	0.3	1.7	-2.001	0.07999	0.1818	FALSE	7.6334
Adrbk1	0.3	1.7	-2.001	0.08005	0.1818	FALSE	10.9978
Khsrp	7.5	30.1	-1.985	2.61e-10	6.12e-09	TRUE	8.3928
Slk	19.3	76.6	-1.983	1.36e-23	1.31e-21	TRUE	8.2572
Dpysl2	9.9	39.2	-1.97	1.57e-12	5.46e-11	TRUE	12.3011
Actn4	1.9	8	-1.969	0.0007248	0.003943	TRUE	8.1675
Wdr6	0.3	1.7	-1.964	0.08769	0.1953	FALSE	9.4135
Znf598	0.3	1.7	-1.964	0.0877	0.1953	FALSE	#N/A
Pfas	0.8	3.6	-1.958	0.01945	0.06015	FALSE	10.366
Pdxdc1	1	4.1	-1.957	0.01268	0.04321	TRUE	9.4535
Nmt1	0.4	1.8	-1.952	0.08212	0.186	FALSE	12.0344
Epb41l1	2.3	9.1	-1.937	0.0003816	0.002335	TRUE	#N/A
Synj2	0.4	1.7	-1.914	0.08983	0.1995	FALSE	6.8022
Usp14	3.1	12.1	-1.913	5.93e-05	0.0004723	TRUE	7.7565
Fbxo30	0.8	3.4	-1.901	0.02493	0.07429	FALSE	8.6126
Idh1	1.9	7.4	-1.894	0.001407	0.006934	TRUE	7.5354
Pex5	4.5	17.1	-1.891	2.75e-06	3.1e-05	TRUE	9.0131
Capzb	0.7	2.9	-1.891	0.03862	0.1027	FALSE	9.6158
Ctnna1	1.1	4.3	-1.884	0.0134	0.04514	TRUE	12.9972
Scyl1	0.5	2.1	-1.874	0.07043	0.1616	FALSE	8.1587
Naa16	0.3	1.6	-1.849	0.1136	0.2385	FALSE	#N/A
Flna	89.7	322.1	-1.843	3.4e-90	3.91e-87	TRUE	9.2083
Camsap1	4.5	16.5	-1.843	5.53e-06	5.78e-05	TRUE	7.0783
Safb2	1.1	4.1	-1.841	0.01741	0.05489	FALSE	6.8551
Cul4a	0.7	2.9	-1.84	0.04234	0.1117	FALSE	11.4136
Hn1	1.4	5.4	-1.827	0.007461	0.02738	TRUE	13.3323
Snrpa1	4.8	17.2	-1.822	4.82e-06	5.16e-05	TRUE	#N/A
Palld	9.1	32.1	-1.808	1.9e-07	2.72e-06	TRUE	10.6709
Ranbp2	47.8	163.8	-1.774	3.92e-43	1e-40	TRUE	6.7914
Fam129b	3.4	11.9	-1.772	0.000152	0.001073	TRUE	11.1451
Mapre1	0.3	1.5	-1.765	0.1356	0.2652	FALSE	11.8074
Txn	0.3	1.5	-1.765	0.1356	0.2652	FALSE	#N/A
Wdr33	2.6	9	-1.764	0.001011	0.005206	TRUE	7.8865
YJ005	4.2	14.4	-1.761	3.66e-05	0.0003047	TRUE	#N/A
Dis3	0.7	2.7	-1.748	0.05712	0.1401	FALSE	7.129
Snx2	1.6	5.6	-1.746	0.008581	0.03071	TRUE	10.9692
Dctn2	1.8	6.3	-1.736	0.005672	0.02216	TRUE	12.5583
Ahcyl1	1.6	5.5	-1.733	0.009294	0.0329	TRUE	8.786
Rnmt	1.6	5.5	-1.733	0.009294	0.0329	TRUE	7.2925
Zyx	15.3	51.1	-1.73	1.21e-10	3.12e-09	TRUE	11.5773
Usp47	3.6	12.2	-1.727	0.0002208	0.001472	TRUE	11.4014
Ywhab	0.7	2.6	-1.723	0.06177	0.1458	FALSE	11.4796
Fkbp3	0.4	1.5	-1.721	0.1379	0.2689	FALSE	6.7378
Mib1	0.4	1.5	-1.721	0.138	0.2689	FALSE	7.901
Cbll1	0.3	1.4	-1.72	0.1483	0.2848	FALSE	6.6373
Thrap3	7.6	25.3	-1.715	1.77e-07	2.58e-06	TRUE	6.8321
Exoc4	1.7	6	-1.715	0.007331	0.02699	TRUE	7.453
Igbp1	3.5	11.6	-1.705	0.0002724	0.001741	TRUE	10.0225
Hnrnpdl	0.7	2.7	-1.699	0.06255	0.1475	FALSE	#N/A
Ctps1	8	26.1	-1.69	9.79e-08	1.53e-06	TRUE	#N/A
Coro1b	15.1	48.8	-1.679	5.72e-13	2.16e-11	TRUE	10.1732
Rab11fip5	9.7	31.3	-1.675	1.86e-08	3.19e-07	TRUE	7.4938
Impact	0.8	2.9	-1.674	0.05594	0.1378	FALSE	10.6711
Peak1	8.4	26.8	-1.657	1.89e-07	2.72e-06	TRUE	#N/A
Map4k5	2.9	9.3	-1.654	0.001534	0.007481	TRUE	6.8122
Chmp4b	2	6.7	-1.653	0.006102	0.02364	TRUE	10.0823
Lpp	26.8	83.8	-1.642	4.06e-13	1.56e-11	TRUE	6.9282
Tns3	6.1	19.2	-1.638	6.82e-06	6.82e-05	TRUE	9.0768
Hnrnpl	3.7	11.6	-1.629	0.0005331	0.003075	TRUE	#N/A
Pdlim5	12.6	38.9	-1.623	8.69e-10	1.83e-08	TRUE	7.4978
Cep170	20.3	61.9	-1.602	1.13e-13	4.9e-12	TRUE	10.8924
Limd1	6.6	20.1	-1.597	1.63e-05	0.0001515	TRUE	9.466
Isy1	0.7	2.4	-1.595	0.09004	0.1998	FALSE	11.3906
Paics	4.3	13.2	-1.591	0.0002231	0.001484	TRUE	7.293
Pdlim1	15.8	47.1	-1.569	3.3e-10	7.68e-09	FALSE	10.6635
Ube2m	0.7	2.4	-1.567	0.09712	0.2141	FALSE	9.6551
Etf1	1.3	4.1	-1.551	0.03593	0.09785	FALSE	12.2875
Efhd2	4.4	13.2	-1.543	0.0003727	0.002293	FALSE	6.7466
Rpn1	0.9	2.7	-1.54	0.081	0.1838	FALSE	6.9524
Tbc1d15	5.8	17	-1.537	5.13e-05	0.0004111	FALSE	8.1723
Pabpc1	7.8	22.8	-1.534	2.94e-06	3.3e-05	FALSE	10.4042
Aven	0.8	2.6	-1.534	0.08668	0.1936	FALSE	8.6693
Nelfe	1.9	5.7	-1.527	0.01617	0.05174	FALSE	#N/A
Ccdc50	0.7	2.4	-1.518	0.1055	0.2298	FALSE	7.6171
Cuedc2	0.7	2.4	-1.518	0.1055	0.2298	FALSE	9.7996
Arpin	13.7	39.3	-1.512	8.31e-09	1.52e-07	FALSE	#N/A
Cherp	4.3	12.6	-1.512	0.001109	0.005623	FALSE	10.8286
Ppp1r2	1.6	4.7	-1.512	0.02813	0.08017	FALSE	10.0246
Copg2	9.8	28	-1.502	6.76e-07	8.79e-06	FALSE	6.8807
Sfpq	7.1	20.3	-1.5	1.72e-05	0.0001586	FALSE	#N/A
Crkl	5.3	15.1	-1.498	0.0001738	0.001205	FALSE	7.1361
R3hcc1l	1.1	3.2	-1.498	0.06713	0.1552	FALSE	#N/A
Fam21	12.2	34.7	-1.495	2.05e-08	3.5e-07	FALSE	#N/A
Kiaa1524	3.9	11.3	-1.486	0.001138	0.005755	FALSE	#N/A
Cct8	48	134.4	-1.484	2.38e-28	3.42e-26	FALSE	12.5305
Tmsb10	0.3	1.2	-1.482	0.2283	0.4129	FALSE	12.088
Thoc2	1.5	4.5	-1.481	0.03395	0.093	FALSE	8.085
Ybx1	1.8	5.2	-1.479	0.02419	0.07255	FALSE	8.0369
Myh11	10.6	29.5	-1.465	3.61e-07	4.91e-06	FALSE	6.7451
Gmps	1.4	4.1	-1.463	0.04336	0.1139	FALSE	7.8678
Actn1	2.3	6.5	-1.451	0.01405	0.04624	FALSE	12.0834
Asns	0.4	1.2	-1.447	0.2301	0.4153	FALSE	10.4053
Fam122a	0.4	1.2	-1.447	0.2301	0.4153	FALSE	#N/A
Pgam1	3.3	9.1	-1.446	0.004109	0.01689	FALSE	9.4458
Fmr1	1.7	4.9	-1.446	0.03117	0.08619	FALSE	8.3351
Bcas2	0.7	2.1	-1.444	0.1401	0.2721	FALSE	10.6744
Nedd1	0.7	2.1	-1.444	0.1401	0.2721	FALSE	9.5111
Hspa4	4.2	11.5	-1.438	0.001379	0.006807	FALSE	8.1275
Arpc2	0.3	1.1	-1.428	0.2492	0.4424	FALSE	9.4289
Ncoa3	0.3	1.1	-1.427	0.2495	0.4424	FALSE	7.0927
Cdk2	0.7	2.1	-1.424	0.1403	0.2723	FALSE	10.1684
Prpf6	0.7	2.1	-1.424	0.1405	0.2724	FALSE	10.716
Cdc42bpb	0.5	1.5	-1.415	0.2017	0.3708	FALSE	10.461
Fam50a	2.4	6.6	-1.413	0.01487	0.04867	FALSE	#N/A
Myh9	158.2	418.9	-1.405	1.14e-40	2.63e-38	FALSE	9.2501
Rps21	0.7	2.2	-1.405	0.1415	0.2736	FALSE	13.3879
Armc6	0.4	1.2	-1.395	0.2509	0.4441	FALSE	9.3605
Fhod1	2.4	6.5	-1.393	0.01668	0.05293	FALSE	10.1316
Map6	3.2	8.6	-1.392	0.006766	0.02577	FALSE	#N/A
Rbm26	4.4	11.8	-1.39	0.001711	0.008236	FALSE	7.8129
Eef2	22.9	59.9	-1.382	4.77e-12	1.5e-10	FALSE	7.6216
Cstf2	3.2	8.6	-1.375	0.006984	0.02648	FALSE	10.7488
Hnrnpul1	0.7	2.1	-1.375	0.1515	0.2898	FALSE	7.1059
Cpsf7	1.1	2.9	-1.37	0.1008	0.2207	FALSE	#N/A
Txnl1	1.1	2.9	-1.37	0.1008	0.2207	FALSE	6.703
Ktn1	34.7	89.8	-1.368	4.45e-12	1.42e-10	FALSE	7.0437
Msrb3	0.7	2	-1.361	0.1628	0.3087	FALSE	6.7448
Sf3b1	22.5	58	-1.359	1.96e-09	4.1e-08	FALSE	7.0487
Anln	1.4	3.8	-1.357	0.06851	0.1578	FALSE	10.4233
Cbx5	0.4	1.1	-1.341	0.2733	0.4779	FALSE	10.1912
Pfdn2	0.4	1.1	-1.341	0.2733	0.4779	FALSE	13.5652
Snrpd3	0.4	1.1	-1.341	0.2733	0.4779	FALSE	13.1472
Acin1	12.7	32.3	-1.339	6.6e-07	8.63e-06	FALSE	8.1662
Ckap5	25	63.1	-1.333	7.71e-11	2.09e-09	FALSE	9.7042
Erc1	18.3	46.3	-1.333	0.0005327	0.003075	FALSE	6.8323
Dhx36	1.6	4.1	-1.333	0.06005	0.1439	FALSE	9.053
Anxa1	14.3	36	-1.323	4.35e-07	5.88e-06	FALSE	6.6961
Vim	56.4	141	-1.32	3.58e-14	1.62e-12	FALSE	8.2575
Myh10	19.1	47.8	-1.318	5.32e-08	8.62e-07	FALSE	9.1053
Arhgdia	1.6	4.1	-1.317	0.06399	0.1487	FALSE	#N/A
Stk10	1.9	4.9	-1.316	0.04397	0.1152	FALSE	6.9049
Hn1l	9.4	23.6	-1.312	3.34e-05	0.0002842	FALSE	8.8138
Pola1	4.9	12.3	-1.304	0.002346	0.01061	FALSE	6.628
Arfgap2	1.8	4.6	-1.304	0.05353	0.1335	FALSE	9.9021
Cdk11b	2.2	5.6	-1.293	0.03721	0.09933	FALSE	#N/A
Eif3a	6.2	15.4	-1.291	0.0006913	0.003787	FALSE	8.2824
Ptma	1.9	4.8	-1.283	0.0521	0.1335	FALSE	#N/A
Bclaf1	9.6	23.6	-1.281	4.26e-05	0.0003429	FALSE	11.1378
Dpysl3	24.4	59.3	-1.274	9.37e-09	1.67e-07	FALSE	8.7909
Epb41l3	35.1	84.8	-1.269	3e-12	1.01e-10	FALSE	#N/A
Abcf2	13.2	32	-1.268	2.44e-06	2.84e-05	FALSE	11.774
Med1	1	2.6	-1.265	0.1408	0.2727	FALSE	7.8991
Epb41l2	14.5	34.8	-1.26	1.29e-06	1.53e-05	FALSE	#N/A
Ccar1	1.5	3.9	-1.26	0.0815	0.1848	FALSE	10.7617
Nup214	18.3	43.9	-1.259	1.76e-07	2.58e-06	FALSE	9.4334
Rbm27	1.4	3.6	-1.259	0.09273	0.2048	FALSE	6.5777
Rprd2	3.1	7.7	-1.257	0.01699	0.05377	FALSE	6.8407
Hspa4l	1.9	4.7	-1.254	0.05904	0.1438	FALSE	6.8596
Cops4	1.2	3	-1.246	0.1222	0.2498	FALSE	11.86
Gemin5	1.1	2.7	-1.244	0.1397	0.2717	FALSE	7.3221
Api5	1.2	3	-1.224	0.1303	0.2565	FALSE	6.7619
Wipi1	1.2	3	-1.224	0.1303	0.2565	FALSE	7.8503
Ddx46	25.6	59.6	-1.215	4.05e-10	9.04e-09	FALSE	8.4401
Flnc	43.9	101.8	-1.211	3.55e-09	6.87e-08	FALSE	9.5525
Hars	1.1	2.6	-1.194	0.1593	0.3024	FALSE	7.2285
Lypla2	5.7	13.2	-1.192	0.003241	0.01391	FALSE	13.3267
Dok1	7.5	17.3	-1.184	0.0009659	0.005035	FALSE	6.7516
Usp15	22.6	50.6	-1.16	8.9e-07	1.11e-05	FALSE	7.4868
Tbcb	3.9	8.8	-1.16	0.01785	0.0561	FALSE	12.6843
Pdlim7	4.3	9.8	-1.158	0.014	0.04617	FALSE	10.188
Snrpd2	0.7	1.7	-1.158	0.2495	0.4424	FALSE	13.446
Trio	5.1	11.5	-1.152	0.007866	0.02864	FALSE	11.2319
Cdv3	5.5	12.3	-1.147	0.005839	0.02273	FALSE	12.0267
Atxn2	3	6.8	-1.147	0.03644	0.09809	FALSE	10.9607
Rplp2	0.7	1.8	-1.146	0.2485	0.4423	FALSE	13.2452
Fam192a	1.5	3.5	-1.135	0.124	0.2498	FALSE	#N/A
Plaa	0.3	0.9	-1.129	0.3812	0.6279	FALSE	9.5762
Rps19	0.3	0.9	-1.129	0.3812	0.6279	FALSE	13.4059
Umps	0.3	0.9	-1.129	0.3812	0.6279	FALSE	7.975
Hs1bp3	1.4	3.3	-1.124	0.1417	0.2738	FALSE	6.9145
Caprin1	2.3	5.1	-1.115	0.07341	0.1676	FALSE	10.3937
Nr3c1	1.6	3.5	-1.11	0.131	0.2574	FALSE	6.8613
Asap2	0.4	0.9	-1.109	0.3797	0.6273	FALSE	#N/A
Ppil2	0.4	0.9	-1.109	0.3797	0.6273	FALSE	7.7967
Cap1	4.5	9.9	-1.107	0.01571	0.05035	FALSE	10.781
Mast4	4.5	9.8	-1.097	0.01891	0.05879	FALSE	9.6894
Plec	235.1	502.3	-1.095	2.97e-37	5.25e-35	FALSE	#N/A
Ppid	2.5	5.6	-1.095	0.06853	0.1578	FALSE	12.7048
Sh3gl1	5.6	12	-1.092	0.009136	0.03259	FALSE	10.1809
Dhx15	3.8	8.3	-1.092	0.02701	0.07854	FALSE	11.2354
Prdx2	0.5	1.2	-1.089	0.3486	0.5838	FALSE	13.5813
Irf2bp2	2.3	5	-1.088	0.08227	0.1861	FALSE	7.4728
Fasn	21.2	45.2	-1.085	6.28e-06	6.36e-05	FALSE	6.963
Iqgap1	9.6	20.5	-1.083	0.001366	0.00676	FALSE	8.7208
Tcerg1	12.4	26.3	-1.079	0.0007412	0.004022	FALSE	11.2478
Cstf2t	3.8	8.2	-1.078	0.0311	0.08612	FALSE	6.6935
Usp10	6.8	14.4	-1.073	0.004864	0.01946	FALSE	7.5043
S100a11	1.9	4.1	-1.069	0.1154	0.2414	FALSE	8.9152
Hdgf	1.9	4.1	-1.068	0.1156	0.2415	FALSE	12.8767
S100a10	0.3	0.8	-1.06	0.4154	0.6658	FALSE	7.4003
Ugdh	3.8	8	-1.054	0.03476	0.09487	FALSE	6.7823
Nudc	9.2	19	-1.045	0.001547	0.007525	FALSE	13.5129
Cul4b	2.8	5.8	-1.043	0.07109	0.1629	FALSE	9.8151
Arhgap12	0.4	0.9	-1.042	0.4132	0.6645	FALSE	8.468
Bloc1s2	0.4	0.9	-1.042	0.4132	0.6645	FALSE	9.447
Gdi2	0.4	0.9	-1.042	0.4132	0.6645	FALSE	7.0197
Prkcd	0.4	0.9	-1.042	0.4132	0.6645	FALSE	8.4095
Rplp1	0.4	0.9	-1.042	0.4132	0.6645	FALSE	13.7837
Sox18	0.4	0.9	-1.042	0.4132	0.6645	FALSE	6.9213
Naf1	0.4	0.9	-1.042	0.4135	0.6645	FALSE	#N/A
Sfswap	2.4	4.9	-1.023	0.1006	0.2207	FALSE	#N/A
Map2k3	0.7	1.5	-1.015	0.3306	0.5589	FALSE	9.7197
Smap	1.1	2.3	-1.01	0.2474	0.441	FALSE	#N/A
Pym1	0.8	1.8	-1.005	0.3007	0.5144	FALSE	#N/A
Rabgap1	1.5	3	-0.9933	0.2002	0.3684	FALSE	11.1075
Cnn3	13.3	26.5	-0.9862	0.0006521	0.003624	FALSE	#N/A
Prdx1	5.4	10.8	-0.9779	0.02272	0.06953	FALSE	13.3376
Kank2	24.5	48.4	-0.9774	7.02e-05	0.0005495	FALSE	#N/A
Inf2	1.7	3.5	-0.9748	0.1764	0.3309	FALSE	#N/A
Zfp36l2	0.4	0.8	-0.973	0.4492	0.6993	FALSE	6.9503
Qrich1	0.4	0.8	-0.9724	0.4495	0.6993	FALSE	8.5127
Racgap1	0.4	0.8	-0.9724	0.4495	0.6993	FALSE	6.9664
Osbpl3	2.7	5.3	-0.9719	0.1042	0.2275	FALSE	8.8718
Sipa1l1	4.6	9.2	-0.9718	0.03527	0.09615	FALSE	10.1051
Pdcd6ip	2.3	4.5	-0.9673	0.1319	0.259	FALSE	6.9501
Bcl9l	0.7	1.5	-0.9647	0.3514	0.5876	FALSE	8.8523
Rheb	0.7	1.5	-0.9647	0.3514	0.5876	FALSE	11.0132
Zc3hc1	0.7	1.5	-0.9643	0.3516	0.5876	FALSE	12.6301
Cwf19l1	0.9	1.8	-0.9627	0.3183	0.5393	FALSE	9.672
Sbno1	4.5	9	-0.962	0.03937	0.1045	FALSE	7.251
Eno1	9.8	19.2	-0.9565	0.00323	0.01389	FALSE	13.12
Serbp1	16	30.9	-0.9468	0.0002458	0.001611	FALSE	13.1873
Ddx39a	4.3	8.4	-0.9406	0.04969	0.1283	FALSE	#N/A
Cpsf6	13.7	26.4	-0.9364	0.0007736	0.004165	FALSE	7.724
Tiprl	8.7	16.7	-0.9319	0.007	0.02649	FALSE	6.6948
Znf207	0.7	1.4	-0.9278	0.3804	0.6279	FALSE	#N/A
Tsc22d1	0.7	1.5	-0.9214	0.3765	0.6228	FALSE	6.7322
Gak	8	15.2	-0.9151	0.01111	0.03852	FALSE	11.4998
Ddx39b	2.8	5.3	-0.9128	0.122	0.2498	FALSE	#N/A
Sipa1l2	1.1	2.1	-0.8991	0.3168	0.5371	FALSE	7.7694
Tfip11	2.4	4.5	-0.8978	0.1578	0.3	FALSE	9.5696
Cttn	42.4	79.1	-0.896	5.36e-08	8.62e-07	FALSE	7.1237
Ddx42	7.7	14.4	-0.8884	0.01747	0.05498	FALSE	6.6764
Ikbkap	2.3	4.4	-0.8846	0.1674	0.3162	FALSE	9.7667
Snap29	3	5.6	-0.8779	0.1257	0.2498	FALSE	8.3568
Rbm17	5.4	9.9	-0.8745	0.04656	0.1213	FALSE	#N/A
Rplp0	2.6	4.9	-0.8698	0.1555	0.2964	FALSE	10.9958
Atxn2l	13.5	24.8	-0.8695	0.002637	0.01181	FALSE	7.2588
Cwc15	3.1	5.7	-0.8627	0.1302	0.2565	FALSE	6.5719
Cdc5l	6.2	11.4	-0.8604	0.03643	0.09809	FALSE	10.86
Sh3d19	2.3	4.1	-0.8448	0.1967	0.3632	FALSE	7.0051
Ahsa1	3.6	6.6	-0.8411	0.1115	0.2343	FALSE	9.3119
Anxa2	16.9	30.3	-0.8374	0.00102	0.005239	FALSE	9.1496
Arhgef17	1.4	2.6	-0.835	0.2972	0.5096	FALSE	6.9161
Kars	1.1	2	-0.8324	0.3539	0.5909	FALSE	11.0836
Pml	2.6	4.8	-0.8294	0.176	0.3303	FALSE	8.4202
Rangap1	16.2	28.8	-0.8268	0.001755	0.008414	FALSE	13.0193
Mcm4	5.7	10.2	-0.8258	0.05907	0.1438	FALSE	13.3445
Esyt2	0.9	1.6	-0.8153	0.4092	0.6618	FALSE	#N/A
Sart3	16	27.9	-0.8011	0.002447	0.011	FALSE	11.8929
Eif2a	16.4	28.5	-0.7977	0.002365	0.01067	FALSE	11.1458
Irf2bpl	2.3	4.1	-0.7938	0.2248	0.4069	FALSE	#N/A
Tagln2	43.8	75.7	-0.7863	9.46e-07	1.17e-05	FALSE	9.3432
Phax	4.1	7.1	-0.7755	0.127	0.2517	FALSE	8.6781
Prpf8	1.7	3	-0.771	0.3022	0.5167	FALSE	10.7169
Ubap2	12.7	21.5	-0.7592	0.01078	0.03759	FALSE	12.241
Flii	1.6	2.7	-0.7544	0.3323	0.5601	FALSE	8.5497
Nars	1.9	3.3	-0.7495	0.2943	0.5058	FALSE	10.243
Srsf7	2	3.5	-0.745	0.2862	0.4945	FALSE	#N/A
Sdpr	17.4	29.1	-0.7436	0.005167	0.02043	FALSE	6.8958
Tufm	0.7	1.2	-0.7413	0.4952	0.7545	FALSE	12.966
Tnrc6b	7.7	12.9	-0.7405	0.05287	0.1335	FALSE	7.0842
Kif11	3.7	6.3	-0.7387	0.1656	0.3131	FALSE	8.8262
Riok3	0.5	0.9	-0.7363	0.5463	0.8103	FALSE	9.8249
Eif3g	1.9	3.3	-0.7293	0.3091	0.5261	FALSE	13.2573
Ctdp1	2.4	4.1	-0.7262	0.2638	0.4634	FALSE	8.172
Kdm4a	2.3	3.9	-0.7116	0.2826	0.4919	FALSE	#N/A
Kif2a	2.8	4.7	-0.7113	0.2408	0.4301	FALSE	7.2586
Eprs	22.4	36.7	-0.7094	0.001857	0.008669	FALSE	7.6449
Jund	1.1	1.8	-0.7008	0.4492	0.6993	FALSE	#N/A
Pdia6	1.1	1.8	-0.7008	0.4492	0.6993	FALSE	7.4161
Trmt6	1.2	2	-0.6989	0.4264	0.6771	FALSE	8.6465
Mdc1	2.3	3.7	-0.6928	0.3035	0.5181	FALSE	6.6525
Eif5	37.2	60.1	-0.6889	0.0001081	0.0007975	FALSE	13.0011
Ppig	2	3.3	-0.6883	0.3314	0.5591	FALSE	6.9523
Snap47	0.8	1.4	-0.6882	0.4996	0.7602	FALSE	#N/A
Eef1g	8	12.9	-0.6881	0.06911	0.159	FALSE	13.2501
Aspscr1	0.8	1.4	-0.6878	0.4999	0.7602	FALSE	8.7194
Lig1	5.5	8.9	-0.6815	0.2	0.3684	FALSE	11.3897
Dhx29	5.2	8.4	-0.6794	0.1517	0.2899	FALSE	8.7037
Hmgcs1	1.6	2.6	-0.6794	0.3886	0.6386	FALSE	#N/A
Zc3h11a	9.8	15.7	-0.6788	0.04818	0.1253	FALSE	6.7223
Rars	19.6	31.4	-0.6785	0.006126	0.02369	FALSE	11.1705
Ranbp1	2.4	3.9	-0.6773	0.3005	0.5144	FALSE	13.2638
Chaf1b	1.2	2	-0.6677	0.4453	0.6993	FALSE	10.4266
Wrnip1	1.1	1.8	-0.6674	0.4645	0.7192	FALSE	6.6566
Ranbp3	13.2	21	-0.665	0.02975	0.08421	FALSE	7.7515
Aimp2	1.1	1.7	-0.6643	0.4757	0.7322	FALSE	#N/A
Mllt10	0.3	0.6	-0.6619	0.6285	0.9001	FALSE	6.8449
Arfgef2	0.3	0.6	-0.6611	0.629	0.9001	FALSE	7.6202
Sqrdl	0.3	0.6	-0.6611	0.629	0.9001	FALSE	6.6732
Kdm3a	1.4	2.3	-0.6496	0.4361	0.6873	FALSE	#N/A
Mcm5	4	6.3	-0.6462	0.2243	0.4064	FALSE	13.0324
Prdx6	11.1	17.5	-0.6458	0.04605	0.1201	FALSE	7.61
Arvcf	0.7	1.2	-0.6385	0.5567	0.8216	FALSE	7.3017
Cfap36	0.7	1.2	-0.6385	0.5567	0.8216	FALSE	#N/A
Zranb2	0.7	1.2	-0.6381	0.557	0.8216	FALSE	11.7338
Jcad	0.7	1.1	-0.6347	0.5653	0.8328	FALSE	#N/A
Stat1	0.7	1.1	-0.6347	0.5653	0.8328	FALSE	7.3317
Cyld	3	4.7	-0.6327	0.2889	0.4983	FALSE	9.213
Supt6h	1.1	1.7	-0.6265	0.5039	0.7649	FALSE	11.5383
Cep170b	6.6	10.3	-0.6236	0.133	0.261	FALSE	#N/A
Shq1	5.3	8.2	-0.6235	0.1777	0.3325	FALSE	7.4936
Snx1	17.2	26.5	-0.6201	0.01817	0.05688	FALSE	8.2121
Larp1	26.7	41.1	-0.617	0.003916	0.01618	FALSE	8.0808
Uhrf1bp1l	4.4	6.8	-0.6148	0.2211	0.4024	FALSE	8.6779
Hectd1	9	13.9	-0.6136	0.09143	0.2025	FALSE	11.9717
Ywhaq	1.5	2.4	-0.602	0.4536	0.7038	FALSE	10.0686
Wbp11	7.6	11.5	-0.5912	0.131	0.2574	FALSE	11.2519
Ppp1r9b	0.7	1.2	-0.5896	0.5847	0.8539	FALSE	8.0495
Ddit3	0.7	1.1	-0.584	0.5939	0.8617	FALSE	7.4551
Trim28	28.7	43.1	-0.5826	0.005079	0.02022	FALSE	12.8336
Eppk1	5.3	8	-0.5797	0.211	0.3864	FALSE	#N/A
Sf1	32	47.9	-0.5784	0.003472	0.01458	FALSE	8.2255
Abr	1.6	2.4	-0.5767	0.4713	0.7283	FALSE	8.2387
Ap2b1	0.4	0.6	-0.5752	0.6707	0.9457	FALSE	8.9103
Rictor	0.4	0.6	-0.5752	0.6707	0.9457	FALSE	#N/A
Xab2	1.8	2.7	-0.575	0.4474	0.6993	FALSE	6.9875
Ahctf1	12.3	18.2	-0.5666	0.07161	0.1638	FALSE	9.923
Ap3s1	0.3	0.6	-0.5642	0.6836	0.958	FALSE	#N/A
Atn1	0.3	0.6	-0.5642	0.6836	0.958	FALSE	6.8808
Casp8	0.3	0.6	-0.5642	0.6836	0.958	FALSE	7.1091
Cep290	0.3	0.6	-0.5642	0.6836	0.958	FALSE	#N/A
CF165	0.3	0.6	-0.5642	0.6836	0.958	FALSE	#N/A
Diaph3	0.3	0.6	-0.5642	0.6836	0.958	FALSE	#N/A
Hspa14	0.3	0.6	-0.5642	0.6836	0.958	FALSE	6.5861
Rcc1	0.3	0.6	-0.5642	0.6836	0.958	FALSE	11.503
Hspa5	17.9	26.5	-0.5618	0.03042	0.08468	FALSE	7.1556
Sarnp	1.6	2.4	-0.5528	0.4884	0.7471	FALSE	#N/A
Brap	2.6	3.9	-0.5524	0.3914	0.6415	FALSE	7.2733
Ppp2r5c	1.6	2.4	-0.5494	0.4942	0.754	FALSE	9.865
Snrnp200	10.9	15.9	-0.5451	0.09991	0.2194	FALSE	#N/A
Pspc1	3	4.4	-0.5437	0.3723	0.6172	FALSE	7.4913
Cnn2	18.4	26.7	-0.5362	0.03692	0.09877	FALSE	8.0687
Shroom4	3.3	4.9	-0.5355	0.3616	0.6016	FALSE	6.9566
Phldb2	2.4	3.5	-0.5329	0.4289	0.6798	FALSE	6.6928
Ddx19a	2.9	4.2	-0.5203	0.3996	0.653	FALSE	7.109
Ubxn7	3.5	5	-0.5186	0.3602	0.5997	FALSE	#N/A
Sugt1	14.1	20.2	-0.5182	0.07782	0.1771	FALSE	7.132
Cad	21.4	30.6	-0.5124	0.08858	0.1969	FALSE	9.6606
Copb1	4.9	7	-0.507	0.3046	0.5196	FALSE	6.8918
Gabpa	2.8	4.1	-0.5064	0.4179	0.6682	FALSE	7.3952
Pds5a	1	1.5	-0.506	0.6005	0.8678	FALSE	7.0331
Apbb2	11.7	16.6	-0.5037	0.1216	0.2498	FALSE	7.9087
Grb10	0.8	1.2	-0.5017	0.6321	0.9034	FALSE	13.1535
Psmd2	5	7.1	-0.5	0.2992	0.5126	FALSE	7.0932
Ncoa2	1.8	2.6	-0.4997	0.5151	0.7768	FALSE	7.0534
Upf1	6.2	8.8	-0.4943	0.2763	0.4821	FALSE	8.367
Rps9	1.5	2.2	-0.4918	0.5486	0.8123	FALSE	13.6537
Tnrc6a	1.2	1.7	-0.4902	0.5933	0.8613	FALSE	10.6279
Eef1b	3.8	5.4	-0.4901	0.3694	0.6132	FALSE	#N/A
Gtf2a1	2.3	3.3	-0.4878	0.4794	0.7359	FALSE	7.0363
Rps29	0.4	0.6	-0.4775	0.7273	0.995	FALSE	13.455
Snrpc	0.4	0.6	-0.4775	0.7273	0.995	FALSE	#N/A
Cdc37	3.1	4.4	-0.4774	0.4269	0.6775	FALSE	8.0984
Prrc2b	6.6	9.2	-0.4766	0.2894	0.4988	FALSE	#N/A
Usp48	1.4	2	-0.4676	0.5855	0.8539	FALSE	8.3653
Zc3h14	5.2	7.2	-0.4638	0.3422	0.5735	FALSE	10.472
Tpr	106.2	146.5	-0.4636	0.0002009	0.00136	FALSE	11.5434
Cacybp	3.4	4.8	-0.4608	0.4246	0.6747	FALSE	7.4214
Prdx4	0.9	1.2	-0.4582	0.6599	0.935	FALSE	12.839
Zmym2	2.1	2.9	-0.4575	0.5288	0.7923	FALSE	11.6951
Spag7	5.7	7.9	-0.4562	0.3164	0.5368	FALSE	10.9864
Eef1a1	78.4	107.6	-0.456	0.0006268	0.0035	FALSE	13.5328
Epb41	7	9.7	-0.4525	0.2758	0.482	FALSE	#N/A
Rbm22	2.1	3	-0.4523	0.527	0.7916	FALSE	6.6901
Cse1l	5.4	7.5	-0.4522	0.3404	0.5714	FALSE	9.0879
Shc1	4.3	5.9	-0.4485	0.3897	0.6398	FALSE	11.4548
Hdac1	1.7	2.3	-0.448	0.5749	0.8436	FALSE	#N/A
Rsrc2	1.9	2.7	-0.4446	0.5511	0.8155	FALSE	9.6047
Fam208b	2.3	3.1	-0.4425	0.5284	0.7923	FALSE	#N/A
Kdm3b	11.5	15.7	-0.4409	0.2901	0.4997	FALSE	#N/A
Raver1	1.4	2	-0.4402	0.606	0.8724	FALSE	8.7778
Sap130	3	4.1	-0.437	0.4787	0.7352	FALSE	9.1331
Srsf5	1.7	2.4	-0.4302	0.5856	0.8539	FALSE	#N/A
Dnajc8	2.6	3.5	-0.4276	0.5157	0.7771	FALSE	10.3123
Smndc1	1.1	1.5	-0.4276	0.658	0.934	FALSE	6.787
Ecm29	2.7	3.7	-0.4265	0.5089	0.7714	FALSE	#N/A
Taf9	1.8	2.4	-0.4196	0.591	0.8585	FALSE	7.4633
Ccdc124	2.6	3.5	-0.4126	0.5294	0.7925	FALSE	10.3028
Hspa9	4.1	5.5	-0.4095	0.4469	0.6993	FALSE	13.0656
Sh3pxd2a	5.3	7	-0.4086	0.3944	0.6459	FALSE	6.9852
Rpl22	1.6	2.1	-0.4062	0.6212	0.8917	FALSE	11.2084
Pcnp	19.5	25.8	-0.4025	0.1144	0.2397	FALSE	7.7672
Anapc1	3.1	4.1	-0.397	0.5163	0.7774	FALSE	6.8835
Znf638	15.2	20	-0.3941	0.1806	0.3365	FALSE	#N/A
Ncoa6	2.9	3.8	-0.3927	0.5363	0.7987	FALSE	6.9986
Clic1	6.9	9	-0.3886	0.3627	0.603	FALSE	8.8905
Sipa1l3	5.8	7.6	-0.383	0.4024	0.6556	FALSE	7.1326
Clint1	18.7	24.4	-0.3796	0.1466	0.282	FALSE	6.7874
Cwc22	2.5	3.3	-0.3753	0.5801	0.8498	FALSE	#N/A
CS043	2.5	3.2	-0.3706	0.588	0.8564	FALSE	#N/A
Mcm6	1.8	2.4	-0.3697	0.6363	0.9072	FALSE	10.37
Capn2	2.5	3.3	-0.3641	0.5894	0.8573	FALSE	7.1563
Snd1	19.1	24.5	-0.3552	0.1795	0.3349	FALSE	7.4814
Ap2a2	0.9	1.1	-0.3525	0.739	1	FALSE	8.8193
2011-09-01	0.7	0.9	-0.3525	0.7557	1	FALSE	#N/A
Sh3pxd2b	7.1	9	-0.3476	0.409	0.6618	FALSE	10.0409
S100a6	3.9	5	-0.3426	0.5362	0.7987	FALSE	8.3866
Sin3a	3.2	4.1	-0.337	0.5802	0.8498	FALSE	10.345
Ppp1r10	8.3	10.6	-0.3367	0.3898	0.6398	FALSE	11.1828
Eif3b	5.2	6.5	-0.3239	0.5065	0.7683	FALSE	9.5762
Vars	14.1	17.6	-0.3212	0.2909	0.5003	FALSE	11.3617
Ctcf	3.5	4.4	-0.3209	0.584	0.8539	FALSE	10.1233
Nmt2	3.1	3.9	-0.3145	0.6117	0.8792	FALSE	6.733
Mtmr10	1.6	2	-0.3105	0.7101	0.9855	FALSE	6.7895
Rpl32	1.7	2.1	-0.3101	0.7018	0.977	FALSE	13.1384
Abcf1	12.8	15.8	-0.308	0.338	0.569	FALSE	12.7817
Taf7	1.4	1.8	-0.3065	0.7247	0.9932	FALSE	7.9631
Psmc2	8.4	10.4	-0.3064	0.4331	0.6836	FALSE	13.2624
Lars	6.8	8.4	-0.3048	0.4818	0.7391	FALSE	13.0086
Hnrnpk	53.8	66.4	-0.3043	0.05687	0.1398	FALSE	7.2094
Rsrc1	2.9	3.6	-0.3042	0.6334	0.9041	FALSE	9.2823
Fxr1	6.2	7.6	-0.3025	0.5035	0.7649	FALSE	#N/A
Snrpe	1.2	1.5	-0.3025	0.7462	1	FALSE	6.654
Nucks1	3.6	4.4	-0.3016	0.6036	0.8697	FALSE	8.5378
Eif5a	5.7	7	-0.3	0.524	0.7876	FALSE	12.5988
Rbbp7	4.5	5.6	-0.2953	0.5726	0.8408	FALSE	7.8978
Ccdc88a	6.9	8.5	-0.2873	0.5303	0.7927	FALSE	8.6442
Mre11a	11.5	14.1	-0.2869	0.4002	0.6536	FALSE	10.4599
Csrp1	0.7	0.9	-0.2857	0.8027	1	FALSE	9.1471
Rab8a	0.7	0.9	-0.2857	0.8027	1	FALSE	12.3706
Rpl37a	0.7	0.9	-0.2857	0.8027	1	FALSE	#N/A
Tmod3	0.7	0.9	-0.2857	0.8027	1	FALSE	8.3682
Trim56	0.7	0.9	-0.2857	0.8027	1	FALSE	7.0989
Tuba1c	99.2	120.5	-0.2812	0.1586	0.3013	FALSE	#N/A
Mvp	7	8.5	-0.2806	0.7187	0.9872	FALSE	7.151
Eif2s2	1.7	2.1	-0.2785	0.7322	0.9993	FALSE	9.7538
Rpsa	4.2	5.1	-0.2722	0.6161	0.8849	FALSE	7.0399
Pdap1	13.3	16	-0.2688	0.399	0.6525	FALSE	12.7772
Ibtk	0.7	0.8	-0.2671	0.8185	1	FALSE	9.6893
Wdr70	3.8	4.6	-0.2638	0.6426	0.9149	FALSE	8.4359
Wdhd1	27	32.5	-0.2633	0.2417	0.4315	FALSE	7.1804
Dido1	7.7	9.3	-0.2604	0.5484	0.8123	FALSE	8.274
Fam135a	1.2	1.5	-0.2595	0.7827	1	FALSE	8.6903
Nfat5	2.4	2.9	-0.2594	0.7134	0.9855	FALSE	8.2183
Bcr	1.2	1.5	-0.2591	0.7829	1	FALSE	7.6014
Tsr1	1.2	1.5	-0.2591	0.7829	1	FALSE	7.1049
Rfx1	1.9	2.3	-0.2561	0.7407	1	FALSE	10.1172
Csde1	38	45.4	-0.2558	0.1815	0.3377	FALSE	12.2699
CA198	10.5	12.6	-0.2544	0.4878	0.7468	FALSE	#N/A
Ipo7	7.8	9.3	-0.2513	0.5404	0.8027	FALSE	6.733
Fxr2	2.4	2.9	-0.248	0.7238	0.9927	FALSE	9.4808
Cep55	4.2	4.9	-0.2413	0.6595	0.935	FALSE	7.2609
Cct2	9.6	11.3	-0.2338	0.5289	0.7923	FALSE	7.0375
Zwint	3.2	3.8	-0.2329	0.705	0.9807	FALSE	11.6062
Pacs1	1.4	1.7	-0.2322	0.7922	1	FALSE	9.0113
Ctnnd1	22.1	25.8	-0.2235	0.4148	0.6656	FALSE	6.7011
Wwox	14.7	17.2	-0.2208	0.4643	0.7192	FALSE	8.3846
Tnpo1	6.4	7.5	-0.2195	0.6252	0.8963	FALSE	6.8267
Zkscan3	0.7	0.8	-0.2164	0.8514	1	FALSE	7.3197
Tuba1a	112.5	130.5	-0.2143	0.2593	0.4572	FALSE	11.4702
Smarcc2	2	2.4	-0.2038	0.7886	1	FALSE	7.9696
Ina	1.5	1.8	-0.2014	0.8139	1	FALSE	7.3952
Gtf2e1	4.9	5.6	-0.1964	0.7013	0.9769	FALSE	10.1174
Chmp2b	4.7	5.4	-0.1938	0.7102	0.9855	FALSE	6.9255
Mcm3	7.5	8.6	-0.1927	0.6462	0.9181	FALSE	7.6483
Kpnb1	6.7	7.7	-0.1915	0.6642	0.94	FALSE	9.9621
Hnrnpll	3.1	3.5	-0.1899	0.764	1	FALSE	#N/A
Mad1l1	2.6	3	-0.1857	0.7861	1	FALSE	7.4302
Rps7	0.9	1	-0.1838	0.8655	1	FALSE	12.2858
Ecd	6.2	7.1	-0.1802	0.6938	0.9705	FALSE	10.7513
Hcfc1	47.1	53.3	-0.1776	0.3088	0.526	FALSE	10.6217
Eif4h	7.3	8.2	-0.1773	0.6775	0.9546	FALSE	13.2173
Srrt	1.6	1.8	-0.1766	0.8359	1	FALSE	#N/A
Hnrnpa2b1	14.7	16.6	-0.1728	0.5699	0.8379	FALSE	7.764
Taf2	0.5	0.6	-0.1714	0.8964	1	FALSE	6.9779
Crk	20.3	22.9	-0.1685	0.5856	0.8539	FALSE	10.8153
Gmeb2	0.7	0.8	-0.1668	0.8844	1	FALSE	7.3249
Smc4	1.5	1.7	-0.1645	0.8484	1	FALSE	6.8655
Map4k4	3.1	3.5	-0.1638	0.795	1	FALSE	8.3876
Dnm2	1.1	1.2	-0.1623	0.8704	1	FALSE	6.7537
Tcp1	22.7	25.4	-0.1618	0.5206	0.783	FALSE	11.5242
Hnrnpa1	17.7	19.8	-0.1612	0.5833	0.8538	FALSE	#N/A
Phgdh	10.7	11.9	-0.1571	0.6589	0.9347	FALSE	7.0669
Tra2b	1.3	1.5	-0.1512	0.8685	1	FALSE	#N/A
Champ1	16	17.6	-0.1403	0.6662	0.9415	FALSE	#N/A
Srp54	4.1	4.5	-0.1363	0.8095	1	FALSE	6.9545
Setdb1	1.1	1.2	-0.1273	0.8978	1	FALSE	8.6436
Fus	8.1	8.9	-0.1211	0.7661	1	FALSE	8.4519
Cfdp1	10.9	11.8	-0.1197	0.7359	1	FALSE	10.2826
Rps26	1.7	1.8	-0.1161	0.8894	1	FALSE	13.3652
Pcbp1	47.2	51	-0.1121	0.5393	0.8016	FALSE	10.8122
Ncapd2	5.6	6.1	-0.1119	0.8195	1	FALSE	10.2611
Tuba4a	92	99.3	-0.1104	0.4399	0.6924	FALSE	7.0196
Pnisr	1.9	2.1	-0.1102	0.8893	1	FALSE	#N/A
Rnf20	1.1	1.2	-0.1093	0.9132	1	FALSE	6.8604
Taf3	3	3.2	-0.1024	0.876	1	FALSE	7.3805
Pi4ka	0.8	0.9	-0.09684	0.9306	1	FALSE	10.8173
Zfyve1	0.8	0.9	-0.09684	0.9306	1	FALSE	6.9495
Hnrnpa3	16.2	17.3	-0.09256	0.7579	1	FALSE	#N/A
Cct6a	10.6	11.3	-0.09137	0.8006	1	FALSE	12.3096
Eif4g1	120	127.8	-0.0907	0.3956	0.6474	FALSE	11.9609
Cbx3	8.1	8.6	-0.0854	0.8372	1	FALSE	8.1143
Fam208a	5.7	6	-0.07887	0.8711	1	FALSE	#N/A
Wbp4	1.4	1.5	-0.07621	0.9327	1	FALSE	9.2119
Uba1	13.1	13.8	-0.07476	0.8204	1	FALSE	11.602
Larp4	10.2	10.7	-0.07439	0.8519	1	FALSE	6.967
Rbm39	13.2	13.9	-0.0728	0.828	1	FALSE	#N/A
Copg1	8.2	8.5	-0.06307	0.8798	1	FALSE	6.6684
Ruvbl1	46	48	-0.06174	0.7392	1	FALSE	11.9094
Set	7.5	7.8	-0.06055	0.8879	1	FALSE	10.6183
Prrc2c	114.5	119.1	-0.05618	0.8121	1	FALSE	#N/A
Arfgap3	0.9	0.9	-0.0538	0.9612	1	FALSE	7.8551
Lrrc47	2.8	2.9	-0.05038	0.9409	1	FALSE	#N/A
Usp7	6.7	7	-0.04977	0.914	1	FALSE	10.7306
Zfr	17.1	17.7	-0.04522	0.878	1	FALSE	6.9385
Ptrf	13.3	13.7	-0.04468	0.8914	1	FALSE	6.6816
Gigyf2	50.4	51.8	-0.04016	0.8146	1	FALSE	#N/A
Srp68	5.8	6	-0.03863	0.9364	1	FALSE	8.0289
Nap1l4	10.1	10.3	-0.03801	0.9191	1	FALSE	13.4086
Rbm33	7.7	7.9	-0.03488	0.9351	1	FALSE	#N/A
Nsrp1	1.4	1.5	-0.03326	0.9708	1	FALSE	#N/A
Srpr	0.8	0.8	-0.02685	0.9809	1	FALSE	8.1721
Nup88	2.7	2.7	-0.01732	0.9802	1	FALSE	10.773
Mars	15.9	16.1	-0.01192	0.9686	1	FALSE	8.9002
Lrrc59	6.9	6.9	-0.008804	0.9845	1	FALSE	11.8483
Nol6	6.3	6.4	-0.005492	0.9907	1	FALSE	9.6174
Fkbp8	3.5	3.5	-0.001425	0.9982	1	FALSE	9.8308
Copa	3.6	3.6	-0.0008125	0.9989	1	FALSE	10.1339
Abcf3	0	0	0	1	1	FALSE	10.6166
Ablim1	0	0	0	1	1	FALSE	7.0141
Acap2	0	0	0	1	1	FALSE	6.8963
Acat2	0	0	0	1	1	FALSE	10.0453
Acbd5	0	0	0	1	1	FALSE	6.7861
Acot1	0	0	0	1	1	FALSE	11.8239
Actr3	0	0	0	1	1	FALSE	9.5762
Adar	0	0	0	1	1	FALSE	7.6866
Adnp2	0	0	0	1	1	FALSE	#N/A
Adrm1	0	0	0	1	1	FALSE	9.2909
Adss	0	0	0	1	1	FALSE	7.0522
Aebp1	0	0	0	1	1	FALSE	7.8957
Agfg2	0	0	0	1	1	FALSE	8.6467
Ahcyl2	0	0	0	1	1	FALSE	#N/A
Ak1	0	0	0	1	1	FALSE	7.1541
Akap1	0	0	0	1	1	FALSE	8.4795
Akt1s1	0	0	0	1	1	FALSE	10.4127
Alkbh3	0	0	0	1	1	FALSE	9.7245
Alkbh5	0	0	0	1	1	FALSE	8.4093
Ampd2	0	0	0	1	1	FALSE	9.2749
Ank2	0	0	0	1	1	FALSE	6.9248
Ankrd49	0	0	0	1	1	FALSE	9.3251
Anp32a	0	0	0	1	1	FALSE	11.2839
Apc	0	0	0	1	1	FALSE	6.945
Apex2	0	0	0	1	1	FALSE	6.7539
Arap1	0	0	0	1	1	FALSE	7.0051
Arhgap18	0	0	0	1	1	FALSE	7.1218
Arhgap22	0	0	0	1	1	FALSE	7.014
Arhgap24	0	0	0	1	1	FALSE	7.6722
Arhgap31	0	0	0	1	1	FALSE	#N/A
Arhgap6	0	0	0	1	1	FALSE	6.9558
Arhgdib	0	0	0	1	1	FALSE	7.0504
Arhgef12	0	0	0	1	1	FALSE	#N/A
Armcx2	0	0	0	1	1	FALSE	12.8352
Arpp19	0	0	0	1	1	FALSE	10.3487
Asxl2	0	0	0	1	1	FALSE	6.9847
Atp1a2	0	0	0	1	1	FALSE	6.819
Atp1a3	0	0	0	1	1	FALSE	6.8012
Atp2b1	0	0	0	1	1	FALSE	7.1844
Atp6v1h	0	0	0	1	1	FALSE	10.1243
Atrip	0	0	0	1	1	FALSE	#N/A
Atxn1l	0	0	0	1	1	FALSE	10.0694
Bach1	0	0	0	1	1	FALSE	9.3133
Bcas3	0	0	0	1	1	FALSE	9.3773
Bin1	0	0	0	1	1	FALSE	10.4106
Bnc1	0	0	0	1	1	FALSE	6.94
Bnc2	0	0	0	1	1	FALSE	6.9698
Brd3	0	0	0	1	1	FALSE	12.505
Bysl	0	0	0	1	1	FALSE	6.7532
CA052	0	0	0	1	1	FALSE	#N/A
Caap1	0	0	0	1	1	FALSE	#N/A
Cacul1	0	0	0	1	1	FALSE	#N/A
Capza2	0	0	0	1	1	FALSE	6.9021
Cars	0	0	0	1	1	FALSE	7.2262
Casc5	0	0	0	1	1	FALSE	6.7768
Casp12	0	0	0	1	1	FALSE	6.9496
Casp8ap2	0	0	0	1	1	FALSE	6.6764
Casp9	0	0	0	1	1	FALSE	9.116
Cbfb	0	0	0	1	1	FALSE	11.6253
Cbx4	0	0	0	1	1	FALSE	6.7052
Cc2d1b	0	0	0	1	1	FALSE	8.0987
Ccdc12	0	0	0	1	1	FALSE	10.1327
Ccdc18	0	0	0	1	1	FALSE	6.9758
Ccdc43	0	0	0	1	1	FALSE	9.5788
Ccdc59	0	0	0	1	1	FALSE	9.8139
Ccdc92	0	0	0	1	1	FALSE	8.4769
Ccdc93	0	0	0	1	1	FALSE	7.0301
Cct7	0	0	0	1	1	FALSE	8.0992
Cd2bp2	0	0	0	1	1	FALSE	11.6587
Cd44	0	0	0	1	1	FALSE	7.4022
Cdc37l1	0	0	0	1	1	FALSE	9.4291
Cdkal1	0	0	0	1	1	FALSE	7.7211
Cdkn2aip	0	0	0	1	1	FALSE	6.8093
Cdt1	0	0	0	1	1	FALSE	11.017
Cebpb	0	0	0	1	1	FALSE	7.373
Cep131	0	0	0	1	1	FALSE	#N/A
Cep162	0	0	0	1	1	FALSE	#N/A
Cep250	0	0	0	1	1	FALSE	6.8249
Cep85	0	0	0	1	1	FALSE	#N/A
Cisd1	0	0	0	1	1	FALSE	9.4348
Ckap4	0	0	0	1	1	FALSE	6.6878
Cks1b	0	0	0	1	1	FALSE	6.8264
Clasp2	0	0	0	1	1	FALSE	6.7639
Cntrob	0	0	0	1	1	FALSE	6.6675
CO040	0	0	0	1	1	FALSE	#N/A
Cog1	0	0	0	1	1	FALSE	8.1635
Coil	0	0	0	1	1	FALSE	8.5915
Commd10	0	0	0	1	1	FALSE	7.4946
Commd8	0	0	0	1	1	FALSE	7.2088
Copb2	0	0	0	1	1	FALSE	11.1768
Coprs	0	0	0	1	1	FALSE	#N/A
Cops7a	0	0	0	1	1	FALSE	9.6252
Copz2	0	0	0	1	1	FALSE	9.7782
Cpeb4	0	0	0	1	1	FALSE	6.7745
CQ053	0	0	0	1	1	FALSE	#N/A
CQ085	0	0	0	1	1	FALSE	#N/A
Crnkl1	0	0	0	1	1	FALSE	7.0232
Crocc	0	0	0	1	1	FALSE	8.5214
Crtc3	0	0	0	1	1	FALSE	7.1998
Cryab	0	0	0	1	1	FALSE	6.9648
CS047	0	0	0	1	1	FALSE	#N/A
Cwc25	0	0	0	1	1	FALSE	#N/A
D10Wsu102e	0	0	0	1	1	FALSE	8.9931
Dab2ip	0	0	0	1	1	FALSE	9.7541
Dap	0	0	0	1	1	FALSE	7.6781
Dcaf5	0	0	0	1	1	FALSE	#N/A
Dcun1d5	0	0	0	1	1	FALSE	9.8976
Denr	0	0	0	1	1	FALSE	8.8189
Dgkz	0	0	0	1	1	FALSE	9.002
Dhx8	0	0	0	1	1	FALSE	7.7129
Dip2b	0	0	0	1	1	FALSE	6.801
Dnajb4	0	0	0	1	1	FALSE	6.9478
Dnajc2	0	0	0	1	1	FALSE	10.547
Dnm1	0	0	0	1	1	FALSE	6.6991
Dnmbp	0	0	0	1	1	FALSE	6.7629
Dnmt3a	0	0	0	1	1	FALSE	6.7154
Dsg1a	0	0	0	1	1	FALSE	6.72
Dtna	0	0	0	1	1	FALSE	7.486
E4f1	0	0	0	1	1	FALSE	8.8056
Ebf2	0	0	0	1	1	FALSE	8.522
Edc3	0	0	0	1	1	FALSE	#N/A
Edf1	0	0	0	1	1	FALSE	12.3009
Eif2ak3	0	0	0	1	1	FALSE	7.0135
Eif3j2	0	0	0	1	1	FALSE	#N/A
Eif4ebp2	0	0	0	1	1	FALSE	8.9495
Elf1	0	0	0	1	1	FALSE	7.4907
Elp2	0	0	0	1	1	FALSE	11.6066
Emc8	0	0	0	1	1	FALSE	#N/A
Emd	0	0	0	1	1	FALSE	7.5875
Eml4	0	0	0	1	1	FALSE	11.1316
Enah	0	0	0	1	1	FALSE	8.5261
Epc2	0	0	0	1	1	FALSE	#N/A
Erf	0	0	0	1	1	FALSE	7.6307
Esd	0	0	0	1	1	FALSE	7.7294
Etfa	0	0	0	1	1	FALSE	10.4453
Exoc3	0	0	0	1	1	FALSE	9.2421
Exoc8	0	0	0	1	1	FALSE	9.9838
Faf1	0	0	0	1	1	FALSE	11.5857
Fam110c	0	0	0	1	1	FALSE	6.7692
Fam193b	0	0	0	1	1	FALSE	#N/A
Fam195a	0	0	0	1	1	FALSE	#N/A
Fam195b	0	0	0	1	1	FALSE	#N/A
Fam63a	0	0	0	1	1	FALSE	#N/A
Fam83h	0	0	0	1	1	FALSE	#N/A
Fem1c	0	0	0	1	1	FALSE	7.9339
Fgd6	0	0	0	1	1	FALSE	7.6605
Fgfr3	0	0	0	1	1	FALSE	6.7692
Flot2	0	0	0	1	1	FALSE	10.354
Foxc2	0	0	0	1	1	FALSE	7.0043
Foxk2	0	0	0	1	1	FALSE	10.1516
Foxp4	0	0	0	1	1	FALSE	6.8918
Frs2	0	0	0	1	1	FALSE	7.6657
Gapdhs	0	0	0	1	1	FALSE	6.7102
Gas2	0	0	0	1	1	FALSE	7.1067
Gas2l1	0	0	0	1	1	FALSE	7.7785
Gata4	0	0	0	1	1	FALSE	6.9948
Gbe1	0	0	0	1	1	FALSE	6.714
Gigyf1	0	0	0	1	1	FALSE	8.1496
Glmn	0	0	0	1	1	FALSE	6.733
Gmds	0	0	0	1	1	FALSE	9.4
Gnai2	0	0	0	1	1	FALSE	10.7635
Gnao1	0	0	0	1	1	FALSE	7.3952
Gnas	0	0	0	1	1	FALSE	9.3492
Golga2	0	0	0	1	1	FALSE	10.2203
Gorasp2	0	0	0	1	1	FALSE	10.656
Gpalpp1	0	0	0	1	1	FALSE	#N/A
Gpatch11	0	0	0	1	1	FALSE	#N/A
Gpatch2	0	0	0	1	1	FALSE	9.008
Gpn1	0	0	0	1	1	FALSE	8.4745
Grcc10	0	0	0	1	1	FALSE	11.4358
H3f3c	0	0	0	1	1	FALSE	#N/A
Hba	0	0	0	1	1	FALSE	#N/A
Hddc2	0	0	0	1	1	FALSE	8.1483
Hdgfrp2	0	0	0	1	1	FALSE	12.7138
Helz	0	0	0	1	1	FALSE	8.9379
Hexim1	0	0	0	1	1	FALSE	8.2746
Hic2	0	0	0	1	1	FALSE	8.2411
Hip1	0	0	0	1	1	FALSE	8.3216
Hip1r	0	0	0	1	1	FALSE	6.9598
Hirip3	0	0	0	1	1	FALSE	10.8285
Hist1h2bh	0	0	0	1	1	FALSE	9.086
Hivep3	0	0	0	1	1	FALSE	7.018
Hmg20a	0	0	0	1	1	FALSE	9.344
Hsf1	0	0	0	1	1	FALSE	10.4322
Hspb8	0	0	0	1	1	FALSE	9.8123
Hspbp1	0	0	0	1	1	FALSE	#N/A
Ifrd1	0	0	0	1	1	FALSE	6.7474
Impa1	0	0	0	1	1	FALSE	7.1327
Incenp	0	0	0	1	1	FALSE	9.8432
Ino80c	0	0	0	1	1	FALSE	10.3576
Iqsec1	0	0	0	1	1	FALSE	6.6635
Irf2bp1	0	0	0	1	1	FALSE	10.2906
Irs1	0	0	0	1	1	FALSE	7.0972
Ist1	0	0	0	1	1	FALSE	#N/A
Itgb1	0	0	0	1	1	FALSE	7.7124
Itsn2	0	0	0	1	1	FALSE	7.2713
Kansl1	0	0	0	1	1	FALSE	#N/A
Kansl3	0	0	0	1	1	FALSE	#N/A
Kdm4c	0	0	0	1	1	FALSE	#N/A
Kdm5a	0	0	0	1	1	FALSE	#N/A
Kiaa1211	0	0	0	1	1	FALSE	#N/A
Kiaa1522	0	0	0	1	1	FALSE	#N/A
Kiaa1551	0	0	0	1	1	FALSE	#N/A
Kif2c	0	0	0	1	1	FALSE	11.919
Kif3c	0	0	0	1	1	FALSE	9.5592
Klf4	0	0	0	1	1	FALSE	6.8336
Kmt2b	0	0	0	1	1	FALSE	#N/A
Kmt2d	0	0	0	1	1	FALSE	#N/A
Krt15	0	0	0	1	1	FALSE	7.0766
Krt33b	0	0	0	1	1	FALSE	6.7391
Krt74	0	0	0	1	1	FALSE	6.7845
Krt8	0	0	0	1	1	FALSE	8.7572
Krt82	0	0	0	1	1	FALSE	7.02
L3mbtl3	0	0	0	1	1	FALSE	7.3615
Las1l	0	0	0	1	1	FALSE	7.1971
Limd2	0	0	0	1	1	FALSE	8.0132
Lrba	0	0	0	1	1	FALSE	9.0746
Lrrc16a	0	0	0	1	1	FALSE	#N/A
Lrrfip2	0	0	0	1	1	FALSE	7.2629
LRWD1	0	0	0	1	1	FALSE	#N/A
Lsm14a	0	0	0	1	1	FALSE	10.744
Lztfl1	0	0	0	1	1	FALSE	6.7274
Mafk	0	0	0	1	1	FALSE	6.7271
Magi1	0	0	0	1	1	FALSE	7.3067
Maoa	0	0	0	1	1	FALSE	6.6554
Mapk8ip3	0	0	0	1	1	FALSE	6.8311
Marf1	0	0	0	1	1	FALSE	#N/A
Mavs	0	0	0	1	1	FALSE	#N/A
Max	0	0	0	1	1	FALSE	6.8627
Mbd3	0	0	0	1	1	FALSE	9.35
Mbnl1	0	0	0	1	1	FALSE	7.9367
Mcm3ap	0	0	0	1	1	FALSE	6.6411
Mdm4	0	0	0	1	1	FALSE	7.0278
Mea1	0	0	0	1	1	FALSE	8.1675
Mepce	0	0	0	1	1	FALSE	7.714
Mex3d	0	0	0	1	1	FALSE	#N/A
Mfhas1	0	0	0	1	1	FALSE	7.9027
Micall1	0	0	0	1	1	FALSE	#N/A
Mios	0	0	0	1	1	FALSE	#N/A
Mlkl	0	0	0	1	1	FALSE	6.7024
Mlxip	0	0	0	1	1	FALSE	6.7879
Mlxipl	0	0	0	1	1	FALSE	7.1083
Mnat1	0	0	0	1	1	FALSE	9.4699
Mnt	0	0	0	1	1	FALSE	7.0908
Mpdz	0	0	0	1	1	FALSE	7.2759
Mrfap1	0	0	0	1	1	FALSE	6.7341
Msl1	0	0	0	1	1	FALSE	#N/A
Msra	0	0	0	1	1	FALSE	6.7725
Msto1	0	0	0	1	1	FALSE	8.291
Mtcl1	0	0	0	1	1	FALSE	#N/A
Mtfr1l	0	0	0	1	1	FALSE	#N/A
Mum1	0	0	0	1	1	FALSE	12.6217
Mustn1	0	0	0	1	1	FALSE	6.729
Mybl2	0	0	0	1	1	FALSE	11.3639
Myh7	0	0	0	1	1	FALSE	6.7674
Myh7b	0	0	0	1	1	FALSE	#N/A
Myo18a	0	0	0	1	1	FALSE	8.0512
Myo1b	0	0	0	1	1	FALSE	7.5951
Myo9a	0	0	0	1	1	FALSE	7.8982
Mysm1	0	0	0	1	1	FALSE	9.2793
Nab1	0	0	0	1	1	FALSE	7.3985
Nbr1	0	0	0	1	1	FALSE	6.9433
Nccrp1	0	0	0	1	1	FALSE	#N/A
Ncoa1	0	0	0	1	1	FALSE	6.7966
Ndc1	0	0	0	1	1	FALSE	#N/A
Ndc80	0	0	0	1	1	FALSE	9.0398
Necap2	0	0	0	1	1	FALSE	8.1586
Nedd4l	0	0	0	1	1	FALSE	8.3312
Nedd8	0	0	0	1	1	FALSE	12.8288
Nelfa	0	0	0	1	1	FALSE	#N/A
Nemf	0	0	0	1	1	FALSE	#N/A
Nfia	0	0	0	1	1	FALSE	6.6797
Nfkb1	0	0	0	1	1	FALSE	7.8362
Nipbl	0	0	0	1	1	FALSE	10.6315
Nkx2-5	0	0	0	1	1	FALSE	6.8569
Nlrp1b	0	0	0	1	1	FALSE	#N/A
Noc3l	0	0	0	1	1	FALSE	7.8304
Nol9	0	0	0	1	1	FALSE	7.6527
Notch2	0	0	0	1	1	FALSE	6.7188
Npat	0	0	0	1	1	FALSE	6.7589
Nrbf2	0	0	0	1	1	FALSE	7.8098
Nsf	0	0	0	1	1	FALSE	9.3988
Numbl	0	0	0	1	1	FALSE	7.2716
Nup35	0	0	0	1	1	FALSE	6.7499
Nwc	0	0	0	1	1	FALSE	#N/A
Ocrl	0	0	0	1	1	FALSE	8.2714
Ostf1	0	0	0	1	1	FALSE	7.799
Otud6b	0	0	0	1	1	FALSE	7.5153
P4ha1	0	0	0	1	1	FALSE	8.2544
Pak1	0	0	0	1	1	FALSE	6.7972
Palm2	0	0	0	1	1	FALSE	6.7124
Patl1	0	0	0	1	1	FALSE	9.7269
Pbxip1	0	0	0	1	1	FALSE	#N/A
Pcbp3	0	0	0	1	1	FALSE	7.9758
Pcmtd2	0	0	0	1	1	FALSE	6.8599
Pdzrn3	0	0	0	1	1	FALSE	9.7636
Peg3	0	0	0	1	1	FALSE	11.1687
Pepd	0	0	0	1	1	FALSE	8.8575
Pfdn1	0	0	0	1	1	FALSE	7.3021
Pgd	0	0	0	1	1	FALSE	12.8219
Pgk2	0	0	0	1	1	FALSE	6.6499
Phc3	0	0	0	1	1	FALSE	6.7781
Phf20l1	0	0	0	1	1	FALSE	6.9146
Phf21a	0	0	0	1	1	FALSE	7.0157
Pias4	0	0	0	1	1	FALSE	8.2852
Pip4k2b	0	0	0	1	1	FALSE	10.9346
Pkn2	0	0	0	1	1	FALSE	8.8553
Plin4	0	0	0	1	1	FALSE	#N/A
Poldip3	0	0	0	1	1	FALSE	11.3661
Polh	0	0	0	1	1	FALSE	6.877
Polr1c	0	0	0	1	1	FALSE	11.4977
Polr3g	0	0	0	1	1	FALSE	7.4229
Pom121	0	0	0	1	1	FALSE	9.1391
Ppie	0	0	0	1	1	FALSE	11.2766
Ppp1r12b	0	0	0	1	1	FALSE	6.7544
Ppp1r12c	0	0	0	1	1	FALSE	7.6717
Ppp1r13b	0	0	0	1	1	FALSE	6.9049
Ppp6r1	0	0	0	1	1	FALSE	#N/A
Prepl	0	0	0	1	1	FALSE	6.8068
Prkca	0	0	0	1	1	FALSE	6.7705
Prkcdbp	0	0	0	1	1	FALSE	7.5463
Prkra	0	0	0	1	1	FALSE	10.547
Pros1	0	0	0	1	1	FALSE	9.1912
Prosc	0	0	0	1	1	FALSE	6.9933
Proser3	0	0	0	1	1	FALSE	#N/A
Prpf31	0	0	0	1	1	FALSE	7.1154
Prpf38a	0	0	0	1	1	FALSE	10.7977
Prr14	0	0	0	1	1	FALSE	9.9743
Prune2	0	0	0	1	1	FALSE	#N/A
Psmc1	0	0	0	1	1	FALSE	10.5124
Psmd12	0	0	0	1	1	FALSE	9.5385
Ptbp3	0	0	0	1	1	FALSE	#N/A
Pum2	0	0	0	1	1	FALSE	7.4622
Qki	0	0	0	1	1	FALSE	#N/A
Rab3gap2	0	0	0	1	1	FALSE	8.5992
Rabep1	0	0	0	1	1	FALSE	7.7742
Rabgap1l	0	0	0	1	1	FALSE	6.9328
Rad21	0	0	0	1	1	FALSE	6.8623
Rad54l2	0	0	0	1	1	FALSE	#N/A
Raf1	0	0	0	1	1	FALSE	9.7267
Rbl1	0	0	0	1	1	FALSE	7.4888
Rbms2	0	0	0	1	1	FALSE	10.9467
Rc3h2	0	0	0	1	1	FALSE	7.7547
Rexo4	0	0	0	1	1	FALSE	7.3034
Rfc4	0	0	0	1	1	FALSE	9.4646
Rmdn2	0	0	0	1	1	FALSE	#N/A
Rnf169	0	0	0	1	1	FALSE	#N/A
Rpap1	0	0	0	1	1	FALSE	10.9556
Rpap2	0	0	0	1	1	FALSE	9.1525
Rreb1	0	0	0	1	1	FALSE	8.3318
Rrp7a	0	0	0	1	1	FALSE	7.1121
Rufy1	0	0	0	1	1	FALSE	7.3619
Runx1	0	0	0	1	1	FALSE	6.7642
Runx2	0	0	0	1	1	FALSE	6.8253
Ruvbl2	0	0	0	1	1	FALSE	10.6085
Samd1	0	0	0	1	1	FALSE	7.3693
Sash1	0	0	0	1	1	FALSE	6.8683
Scaf8	0	0	0	1	1	FALSE	#N/A
Scoc	0	0	0	1	1	FALSE	8.5606
Sdad1	0	0	0	1	1	FALSE	9.2649
Sec24a	0	0	0	1	1	FALSE	6.6902
Secisbp2l	0	0	0	1	1	FALSE	#N/A
2005-09-01	0	0	0	1	1	FALSE	#N/A
Setx	0	0	0	1	1	FALSE	8.3924
Sf3a3	0	0	0	1	1	FALSE	12.566
Sgol2	0	0	0	1	1	FALSE	9.0765
Sh3bp5l	0	0	0	1	1	FALSE	11.1842
Sh3glb1	0	0	0	1	1	FALSE	7.382
Shoc2	0	0	0	1	1	FALSE	6.7852
Sik3	0	0	0	1	1	FALSE	#N/A
Six4	0	0	0	1	1	FALSE	6.9159
Skt	0	0	0	1	1	FALSE	#N/A
Slbp	0	0	0	1	1	FALSE	6.6228
Slx4ip	0	0	0	1	1	FALSE	#N/A
Smap2	0	0	0	1	1	FALSE	10.1198
Smco1	0	0	0	1	1	FALSE	#N/A
Smg9	0	0	0	1	1	FALSE	#N/A
Snap23	0	0	0	1	1	FALSE	9.6448
Soga1	0	0	0	1	1	FALSE	#N/A
Soga3	0	0	0	1	1	FALSE	#N/A
Sorbs1	0	0	0	1	1	FALSE	6.942
Sowahc	0	0	0	1	1	FALSE	#N/A
Sox5	0	0	0	1	1	FALSE	9.3741
Sox9	0	0	0	1	1	FALSE	11.6405
Sp2	0	0	0	1	1	FALSE	6.8465
Spata5	0	0	0	1	1	FALSE	6.7774
Spc24	0	0	0	1	1	FALSE	9.8224
Spdl1	0	0	0	1	1	FALSE	#N/A
Srsf2	0	0	0	1	1	FALSE	#N/A
Stard13	0	0	0	1	1	FALSE	8.1496
Steap3	0	0	0	1	1	FALSE	7.0286
Stk3	0	0	0	1	1	FALSE	6.877
Strip1	0	0	0	1	1	FALSE	#N/A
Stx5	0	0	0	1	1	FALSE	#N/A
Stx7	0	0	0	1	1	FALSE	8.1412
Stxbp5	0	0	0	1	1	FALSE	7.9287
Sumo2	0	0	0	1	1	FALSE	10.7936
Sun1	0	0	0	1	1	FALSE	#N/A
Sun2	0	0	0	1	1	FALSE	#N/A
Syn1	0	0	0	1	1	FALSE	7.6724
Syn2	0	0	0	1	1	FALSE	6.9394
Tab3	0	0	0	1	1	FALSE	#N/A
Tada3	0	0	0	1	1	FALSE	#N/A
Taf8	0	0	0	1	1	FALSE	6.868
Taldo1	0	0	0	1	1	FALSE	12.1025
Tanc2	0	0	0	1	1	FALSE	6.8094
Tbc1d25	0	0	0	1	1	FALSE	7.968
Tbc1d2b	0	0	0	1	1	FALSE	7.7215
Tcf7l2	0	0	0	1	1	FALSE	8.5352
Tenc1	0	0	0	1	1	FALSE	7.0671
Tex2	0	0	0	1	1	FALSE	7.0643
Tex9	0	0	0	1	1	FALSE	9.496
Tfap2a	0	0	0	1	1	FALSE	#N/A
Tfcp2	0	0	0	1	1	FALSE	#N/A
Tfeb	0	0	0	1	1	FALSE	#N/A
Thoc7	0	0	0	1	1	FALSE	12.4043
Ticrr	0	0	0	1	1	FALSE	#N/A
Timeless	0	0	0	1	1	FALSE	10.557
Tlk1	0	0	0	1	1	FALSE	11.1678
Tlk2	0	0	0	1	1	FALSE	11.0665
Tmem131	0	0	0	1	1	FALSE	7.0519
Tmem199	0	0	0	1	1	FALSE	10.3136
Tmem57	0	0	0	1	1	FALSE	9.8219
Tnip1	0	0	0	1	1	FALSE	7.8535
Tom1l2	0	0	0	1	1	FALSE	6.7381
Topbp1	0	0	0	1	1	FALSE	6.7009
Tpm2	0	0	0	1	1	FALSE	8.5884
Tprn	0	0	0	1	1	FALSE	#N/A
Trerf1	0	0	0	1	1	FALSE	7.3899
Trim32	0	0	0	1	1	FALSE	10.7241
Trim41	0	0	0	1	1	FALSE	8.482
Trps1	0	0	0	1	1	FALSE	8.8091
Tshz1	0	0	0	1	1	FALSE	9.4568
Tsn	0	0	0	1	1	FALSE	8.027
Ttc28	0	0	0	1	1	FALSE	8.3908
Ttc4	0	0	0	1	1	FALSE	8.5194
Ttf2	0	0	0	1	1	FALSE	9.718
Ttk	0	0	0	1	1	FALSE	6.8314
Tubb1	0	0	0	1	1	FALSE	6.9299
Tubb2a	0	0	0	1	1	FALSE	6.6997
Tubb2b	0	0	0	1	1	FALSE	13.5195
Tulp4	0	0	0	1	1	FALSE	9.8045
Twist2	0	0	0	1	1	FALSE	7.5193
Txlna	0	0	0	1	1	FALSE	8.4668
Uaca	0	0	0	1	1	FALSE	9.8715
Uap1l1	0	0	0	1	1	FALSE	8.5199
Ube2j1	0	0	0	1	1	FALSE	7.0042
Ubxn6	0	0	0	1	1	FALSE	9.1607
Uri1	0	0	0	1	1	FALSE	#N/A
Usp19	0	0	0	1	1	FALSE	10.8251
Usp53	0	0	0	1	1	FALSE	6.7262
Utp14b	0	0	0	1	1	FALSE	6.7365
Uvssa	0	0	0	1	1	FALSE	#N/A
Vamp3	0	0	0	1	1	FALSE	12.1977
Vbp1	0	0	0	1	1	FALSE	7.7775
Vimp	0	0	0	1	1	FALSE	#N/A
Vps8	0	0	0	1	1	FALSE	7.9298
Vti1b	0	0	0	1	1	FALSE	10.8573
Wdr44	0	0	0	1	1	FALSE	6.6649
Wwtr1	0	0	0	1	1	FALSE	8.6685
Xdh	0	0	0	1	1	FALSE	6.8119
Xirp2	0	0	0	1	1	FALSE	6.7676
Yars	0	0	0	1	1	FALSE	6.9047
Zbtb1	0	0	0	1	1	FALSE	7.0304
Zc2hc1a	0	0	0	1	1	FALSE	#N/A
Zcchc11	0	0	0	1	1	FALSE	6.7102
Zcchc14	0	0	0	1	1	FALSE	8.0092
Zdhhc5	0	0	0	1	1	FALSE	8.7012
Zfa	0	0	0	1	1	FALSE	6.641
Zfand5	0	0	0	1	1	FALSE	#N/A
Zfp91	0	0	0	1	1	FALSE	7.7487
Zhx3	0	0	0	1	1	FALSE	7.3132
Znf106	0	0	0	1	1	FALSE	#N/A
Znf131	0	0	0	1	1	FALSE	#N/A
Znf326	0	0	0	1	1	FALSE	#N/A
Znf507	0	0	0	1	1	FALSE	#N/A
Znf512	0	0	0	1	1	FALSE	#N/A
Znf574	0	0	0	1	1	FALSE	#N/A
Znf592	0	0	0	1	1	FALSE	#N/A
Znf827	0	0	0	1	1	FALSE	#N/A
Zc3hav1	14.1	14.1	0.001178	0.9971	1	FALSE	6.9737
Eif4g3	25.2	24.9	0.01381	0.9554	1	FALSE	#N/A
Gatad2b	9.4	9.3	0.01597	0.9684	1	FALSE	7.2007
Rpap3	7.6	7.5	0.01773	0.9678	1	FALSE	8.3456
Mta1	8.3	8.2	0.01799	0.9655	1	FALSE	6.9464
Bag3	25.2	24.9	0.01832	0.9516	1	FALSE	11.3798
Hat1	1.2	1.2	0.02372	0.9807	1	FALSE	13.1204
Pdia3	1.2	1.2	0.02372	0.9807	1	FALSE	10.8313
Eif3l	1.2	1.2	0.02418	0.9804	1	FALSE	#N/A
Ptpn2	1.2	1.2	0.02418	0.9804	1	FALSE	7.6051
Btf3	4.2	4.1	0.02541	0.9644	1	FALSE	13.3092
Gtpbp1	2.5	2.5	0.03036	0.9664	1	FALSE	10.3536
Eif4g2	38.5	37.5	0.03861	0.8498	1	FALSE	10.6801
Ptbp1	7.8	7.6	0.03864	0.9281	1	FALSE	13.5682
Pkm	29	28.1	0.04326	0.8523	1	FALSE	#N/A
Rc3h1	1.2	1.1	0.04594	0.9632	1	FALSE	6.9633
Hnrnpab	5.2	5	0.04863	0.9253	1	FALSE	13.228
Hmgb2	1.6	1.5	0.05335	0.9519	1	FALSE	8.609
Rps3a	28.1	27	0.05405	0.8237	1	FALSE	9.9226
Nufip2	45.1	43.3	0.05822	0.7492	1	FALSE	6.7644
Dgcr14	2.2	2.1	0.0592	0.9389	1	FALSE	8.7122
Ssrp1	6.8	6.5	0.06118	0.8939	1	FALSE	12.0257
Naca	6.3	6	0.06157	0.897	1	FALSE	12.7409
Kpna3	3.9	3.8	0.06254	0.9155	1	FALSE	7.8278
Rbm25	11.5	11	0.0637	0.8583	1	FALSE	#N/A
Sqstm1	2.2	2.1	0.06472	0.9324	1	FALSE	8.3453
U2surp	46.5	44.4	0.06613	0.8139	1	FALSE	#N/A
Yap1	27	25.6	0.0741	0.7705	1	FALSE	10.5738
Ccdc174	1.6	1.5	0.0781	0.9294	1	FALSE	#N/A
Ran	11.7	11.1	0.08246	0.8163	1	FALSE	8.3574
Smarcc1	5.1	4.8	0.08397	0.8735	1	FALSE	6.7028
Myof	32.9	31	0.08437	0.7292	0.9963	FALSE	#N/A
Nsfl1c	14.7	13.8	0.09198	0.7752	1	FALSE	9.789
Rps20	5.7	5.4	0.09207	0.8533	1	FALSE	6.7388
Naa15	4.9	4.6	0.09222	0.8647	1	FALSE	#N/A
Rps23	17.9	16.7	0.09678	0.7391	1	FALSE	6.7881
Syncrip	10.6	9.9	0.0972	0.7966	1	FALSE	9.857
Hnrnpu	50	46.6	0.1012	0.5683	0.8361	FALSE	#N/A
Cct3	8.1	7.5	0.1025	0.8096	1	FALSE	13.3114
Fosl1	1.9	1.7	0.1042	0.8995	1	FALSE	#N/A
Atp1a1	2.4	2.2	0.108	0.8847	1	FALSE	13.1828
Llph	1.7	1.6	0.108	0.9007	1	FALSE	7.9643
Krt28	1.9	1.8	0.1086	0.894	1	FALSE	6.7977
Rsbn1	2.3	2.1	0.1134	0.882	1	FALSE	6.9295
Krt85	4.7	4.3	0.1137	0.8368	1	FALSE	#N/A
Chd5	29.6	27.3	0.1186	0.6004	0.8678	FALSE	7.0448
Zmat3	1.6	1.5	0.121	0.8915	1	FALSE	8.9135
Luc7l	3.9	3.6	0.1232	0.8367	1	FALSE	11.6649
Pcbp2	25.3	23.1	0.1307	0.5984	0.8671	FALSE	12.7933
Mat2a	2.3	2.1	0.1309	0.8636	1	FALSE	13.4574
Chaf1a	4.8	4.3	0.1323	0.8111	1	FALSE	11.0929
Atp5a1	8.3	7.5	0.1326	0.754	1	FALSE	9.5347
Xpo1	7.8	7.1	0.1334	0.759	1	FALSE	6.8016
Rbmxl1	9.4	8.5	0.1396	0.7331	0.9999	FALSE	#N/A
Birc6	11.8	10.7	0.141	0.6961	0.9731	FALSE	6.9691
Pold3	4.5	4.1	0.1498	0.7905	1	FALSE	10.6691
Usp9x	13.5	12.1	0.1547	0.6648	0.9403	FALSE	6.9261
Vcpip1	48.6	43.6	0.1558	0.3855	0.634	FALSE	6.6982
Sap30bp	6.6	5.9	0.1596	0.7353	1	FALSE	8.1418
Rpl9	3.1	2.7	0.1657	0.8049	1	FALSE	13.5093
Cdkn1a	2.8	2.5	0.1678	0.8115	1	FALSE	7.6543
Rpl30	2.8	2.5	0.1678	0.8115	1	FALSE	12.7036
Hp1bp3	23.3	20.7	0.1697	0.5192	0.7814	FALSE	12.5631
Morc3	1	0.9	0.1722	0.8721	1	FALSE	8.8697
Ubr4	5	4.4	0.1761	0.745	1	FALSE	#N/A
Ofd1	0.7	0.6	0.1814	0.882	1	FALSE	6.6612
Snrpd1	0.7	0.6	0.1814	0.882	1	FALSE	9.2576
Rps3	21.4	18.8	0.186	0.5151	0.7768	FALSE	13.1364
Rpl7	3.9	3.4	0.1861	0.7623	1	FALSE	#N/A
Khdrbs1	1.1	0.9	0.208	0.8449	1	FALSE	9.0347
Taok3	2.4	2	0.2146	0.7777	1	FALSE	6.7803
Mtdh	21.5	18.5	0.216	0.4273	0.6776	FALSE	9.0383
Hist1h4a	17.1	14.7	0.218	0.5348	0.7975	FALSE	11.5789
Gcn1	36.5	31.3	0.2208	0.4889	0.7475	FALSE	#N/A
Cpsf2	4.5	3.9	0.2241	0.6938	0.9705	FALSE	8.3299
Hsph1	25.5	21.7	0.2269	0.3697	0.6134	FALSE	#N/A
Dnajc9	0.7	0.6	0.2303	0.8495	1	FALSE	6.6398
Mef2d	3.5	2.9	0.2322	0.7183	0.9872	FALSE	6.9774
Rps15a	6.3	5.4	0.2339	0.6303	0.9014	FALSE	10.6796
Elavl1	3.6	3.1	0.2346	0.71	0.9855	FALSE	10.946
Svil	5.6	4.8	0.2362	0.6464	0.9181	FALSE	6.9113
Brd4	24.1	20.4	0.2408	0.4079	0.6605	FALSE	12.6948
Ipo5	30.7	25.9	0.2421	0.3054	0.5206	FALSE	11.5478
Ubn1	1.4	1.2	0.2501	0.7923	1	FALSE	6.9409
Exosc10	13.8	11.6	0.2534	0.4535	0.7038	FALSE	8.2449
Chd4	97.3	81.2	0.2597	0.0514	0.1324	FALSE	10.1207
Luzp1	21	17.5	0.2614	0.437	0.6882	FALSE	10.4383
Zcchc8	2.4	2	0.264	0.7291	0.9963	FALSE	11.7421
Rtf1	5.7	4.7	0.2698	0.5998	0.8678	FALSE	#N/A
Psip1	2.2	1.8	0.2756	0.7296	0.9963	FALSE	10.8308
Serpinh1	17.4	14.3	0.2765	0.3663	0.6086	FALSE	13.2588
Rcc2	5.3	4.3	0.277	0.6062	0.8724	FALSE	8.0439
Cdca2	1.1	0.8	0.2774	0.7963	1	FALSE	10.6232
Ifi203	1.2	0.9	0.2785	0.7873	1	FALSE	6.6609
Fiz1	0.7	0.6	0.2791	0.8218	1	FALSE	10.1077
Wdr62	0.7	0.6	0.2791	0.8218	1	FALSE	6.8936
Cyfip1	4.2	3.4	0.2853	0.6332	0.9041	FALSE	7.2866
Fbl	14.7	12	0.2858	0.3912	0.6415	FALSE	#N/A
Tubb5	149.2	121.7	0.2942	0.004087	0.01682	FALSE	13.4757
Hist1h3a	7	5.7	0.2963	0.5308	0.7927	FALSE	9.9914
Hist1h3b	7	5.7	0.2963	0.5308	0.7927	FALSE	#N/A
Cct4	4	3.2	0.2965	0.635	0.9059	FALSE	12.5088
Psmc6	1.9	1.6	0.2968	0.7239	0.9927	FALSE	6.9417
Srpk1	2.5	2	0.2969	0.6924	0.9697	FALSE	10.6677
Prrc2a	29.1	23.6	0.2983	0.2838	0.4928	FALSE	#N/A
Luc7l2	13.8	11.1	0.3042	0.3749	0.6206	FALSE	7.7946
Eif3c	10.1	8.1	0.3134	0.431	0.6821	FALSE	#N/A
Hdlbp	138.2	110.7	0.3191	0.004815	0.0193	FALSE	11.9269
Sart1	55.6	44.4	0.3256	0.06539	0.1517	FALSE	8.8666
Tubb4a	111.6	89	0.3264	0.007148	0.02675	FALSE	#N/A
Ncaph	1.6	1.2	0.3274	0.7227	0.9922	FALSE	10.5149
Rpl17	21.6	17.1	0.3336	0.2363	0.4242	FALSE	6.7002
Rpl19	9.5	7.5	0.3343	0.414	0.6648	FALSE	12.6387
Rpl31	2.8	2.2	0.3354	0.6429	0.9149	FALSE	13.2521
Krt84	3.9	3	0.3404	0.5854	0.8539	FALSE	6.7229
Ilf3	3.7	2.9	0.3418	0.5907	0.8585	FALSE	11.3816
Ddx3x	68.3	53.8	0.3444	0.02948	0.08355	FALSE	9.1261
Tubb4b	132.6	104.3	0.3456	0.001595	0.007727	FALSE	#N/A
Smarca2	4.5	3.5	0.3493	0.5465	0.8103	FALSE	9.5243
Ipo4	3.6	2.8	0.3571	0.5802	0.8498	FALSE	10.4944
Cdk5rap2	4.6	3.6	0.3573	0.5345	0.7975	FALSE	7.8953
Hspd1	6.5	5	0.3598	0.4662	0.7214	FALSE	12.9466
Iars	4.5	3.4	0.3607	0.5408	0.8028	FALSE	10.0828
Gtf2ird2	2.4	1.8	0.3623	0.6396	0.9113	FALSE	8.1017
Rps16	5.9	4.5	0.3691	0.4737	0.7295	FALSE	13.2572
Prpf3	21.9	16.9	0.3701	0.1812	0.3373	FALSE	11.3711
Mthfd1	7.4	5.7	0.3729	0.4196	0.6702	FALSE	10.5422
Hmgb1	5.1	3.9	0.376	0.4969	0.7568	FALSE	6.8623
Abce1	1.2	0.9	0.3765	0.7165	0.9855	FALSE	7.491
Ahsa2	1.2	0.9	0.3765	0.7165	0.9855	FALSE	7.655
Arf3	1.2	0.9	0.3765	0.7165	0.9855	FALSE	8.7281
CD027	1.2	0.9	0.3765	0.7165	0.9855	FALSE	#N/A
Ddx20	1.2	0.9	0.3765	0.7165	0.9855	FALSE	9.9446
Fosl2	1.2	0.9	0.3765	0.7165	0.9855	FALSE	7.3623
Haus8	1.2	0.9	0.3765	0.7165	0.9855	FALSE	#N/A
Kntc1	1.2	0.9	0.3765	0.7165	0.9855	FALSE	9.3621
Mettl11b	1.2	0.9	0.3765	0.7165	0.9855	FALSE	#N/A
Npm3	1.2	0.9	0.3765	0.7165	0.9855	FALSE	12.5318
Prpf18	1.2	0.9	0.3765	0.7165	0.9855	FALSE	10.6816
Psmc5	1.2	0.9	0.3765	0.7165	0.9855	FALSE	11.9328
Sf3a2	1.2	0.9	0.3765	0.7165	0.9855	FALSE	7.0235
Uchl5	1.2	0.9	0.3765	0.7165	0.9855	FALSE	10.1153
Zcchc2	1.2	0.9	0.3765	0.7165	0.9855	FALSE	6.6431
Hmga2	2.4	1.8	0.3781	0.6246	0.896	FALSE	6.7149
Dynll1	1.6	1.2	0.38	0.6829	0.958	FALSE	13.3037
Ubap2l	81.5	62.6	0.3814	0.00938	0.03314	FALSE	8.6983
Hnrnpd	2.7	2.1	0.3828	0.6008	0.8678	FALSE	7.1254
Atrx	18.5	14.1	0.388	0.2883	0.4976	FALSE	6.8185
Kif4	41	31.3	0.3899	0.1548	0.2957	FALSE	9.3373
Otud4	13.8	10.5	0.39	0.2608	0.4591	FALSE	8.6135
Mthfd1l	2.8	2.1	0.3972	0.5863	0.8544	FALSE	#N/A
Riok1	2.4	1.8	0.3979	0.6089	0.8757	FALSE	8.3048
Gtf2f2	6.9	5.2	0.4005	0.4099	0.6623	FALSE	10.5292
Cdk13	1.5	1.1	0.4097	0.6637	0.9398	FALSE	#N/A
Dhx9	23	17.3	0.4132	0.1488	0.2856	FALSE	10.2205
Mccc2	0.9	0.6	0.4141	0.7264	0.9949	FALSE	6.8233
Gapdh	33.9	25.4	0.4145	0.09779	0.2151	FALSE	13.0151
Kpna4	2.4	1.7	0.4179	0.5945	0.862	FALSE	6.7242
Rpl18	3.3	2.4	0.4197	0.538	0.8007	FALSE	13.191
Rnf213	8.5	6.3	0.4235	0.4243	0.6747	FALSE	6.9287
Hist2h2ac	11.1	8.2	0.4242	0.2762	0.4821	FALSE	13.3324
Kif14	5.2	3.8	0.4315	0.4361	0.6873	FALSE	6.96
Gen1	1.6	1.1	0.434	0.6437	0.9154	FALSE	#N/A
Gpatch1	3.1	2.3	0.4407	0.5283	0.7923	FALSE	7.3336
Nop56	72.9	53.7	0.441	0.06532	0.1517	FALSE	#N/A
Ppp2r1a	2	1.5	0.4422	0.5999	0.8678	FALSE	9.6455
Tubb6	58.2	42.8	0.4429	0.01042	0.03645	FALSE	9.2325
Srsf6	4.5	3.3	0.4448	0.4498	0.6993	FALSE	#N/A
Zc3h15	1.2	0.8	0.4465	0.6701	0.9457	FALSE	9.197
Cdk4	4.5	3.3	0.4495	0.4485	0.6993	FALSE	11.0206
Rps4x	20.4	14.9	0.4525	0.1384	0.2695	FALSE	13.6109
Nsun2	9.9	7.1	0.4623	0.2598	0.4577	FALSE	8.7454
Hist1h2ah	13.5	9.7	0.4647	0.1948	0.36	FALSE	12.9862
Trip4	0.8	0.6	0.4671	0.6988	0.9739	FALSE	6.9018
Aimp1	0.8	0.6	0.468	0.6983	0.9737	FALSE	#N/A
Canx	0.8	0.6	0.468	0.6983	0.9737	FALSE	6.7247
Ccser2	0.8	0.6	0.468	0.6983	0.9737	FALSE	#N/A
Psmd3	0.8	0.6	0.468	0.6983	0.9737	FALSE	6.8429
Rpl24	4.2	3	0.4716	0.4428	0.6959	FALSE	9.6241
Slu7	11.1	8	0.4729	0.224	0.4061	FALSE	7.6886
Rps5	4.3	3.1	0.4755	0.4329	0.6836	FALSE	13.1933
Rbmx2	1.7	1.2	0.4759	0.6036	0.8697	FALSE	6.8852
Srek1	1.7	1.2	0.4764	0.6033	0.8697	FALSE	#N/A
Gsto1	3.6	2.5	0.4785	0.4697	0.7263	FALSE	10.949
Rps11	9.7	6.9	0.4788	0.2488	0.4424	FALSE	13.7461
Usp42	4.7	3.3	0.4806	0.4109	0.6636	FALSE	9.27
Nup93	5.5	3.9	0.4812	0.3733	0.6184	FALSE	12.4109
Nup133	2	1.4	0.4864	0.5669	0.8345	FALSE	9.5417
Med19	11.9	8.4	0.4875	0.1972	0.3639	FALSE	8.3094
Eif5b	38.1	27	0.4919	0.1699	0.3199	FALSE	8.2944
Ppm1g	5	3.5	0.4927	0.3835	0.6311	FALSE	8.6568
Matr3	10.5	7.4	0.4975	0.2206	0.4018	FALSE	11.9823
Rps14	8.9	6.2	0.5013	0.25	0.4428	FALSE	13.3666
Slc25a4	8.7	6.1	0.503	0.2544	0.4488	FALSE	7.8321
Actg1	39.9	28.1	0.5043	0.01736	0.0548	FALSE	#N/A
Emsy	2.5	1.7	0.5107	0.5109	0.7734	FALSE	#N/A
Txlng	0.9	0.6	0.511	0.6702	0.9457	FALSE	#N/A
Ccnt1	13	9.1	0.5113	0.1605	0.3045	FALSE	11.9603
Surf6	6.9	4.8	0.5114	0.2959	0.5081	FALSE	8.0531
Fam193a	2.1	1.5	0.5124	0.5393	0.8016	FALSE	#N/A
H2afz	7.3	5.1	0.5127	0.2835	0.4926	FALSE	12.7831
Spg20	1.7	1.2	0.5149	0.5725	0.8408	FALSE	9.0819
Dnmt1	24.3	17	0.5162	0.09664	0.2132	FALSE	11.5405
Znf609	2.5	1.7	0.5165	0.5103	0.773	FALSE	#N/A
Tardbp	13.2	9.2	0.5175	0.1554	0.2964	FALSE	8.8715
Rbbp4	2.6	1.8	0.5209	0.4948	0.7545	FALSE	8.744
Nat10	39.8	27.7	0.5231	0.01661	0.05278	FALSE	7.6929
Ddx21	35.2	24.4	0.5259	0.01936	0.06004	FALSE	11.0012
Srsf1	1.3	0.9	0.5273	0.6031	0.8697	FALSE	#N/A
Dkc1	20.6	14.2	0.5311	0.1974	0.364	FALSE	6.7345
Rpl27	3.9	2.7	0.532	0.4031	0.6556	FALSE	13.4724
Actb	41.1	28.4	0.5325	0.01109	0.03847	FALSE	13.4518
Fau	20.9	14.4	0.5361	0.06657	0.1543	FALSE	#N/A
Krt79	6.6	4.5	0.5372	0.2855	0.4941	FALSE	6.7247
Slc25a5	5.4	3.7	0.5372	0.331	0.5591	FALSE	13.1121
Ddx17	25.5	17.5	0.5373	0.04391	0.1152	FALSE	13.5617
Xrcc1	1.8	1.2	0.5375	0.5541	0.8188	FALSE	10.3241
Rpl13	11.9	8.1	0.5408	0.1558	0.2968	FALSE	#N/A
Bzw1	1.4	0.9	0.5475	0.5886	0.8566	FALSE	10.1643
Pogz	7.4	5	0.5508	0.2513	0.4445	FALSE	7.391
Rps27	11.9	8.1	0.5527	0.1468	0.2823	FALSE	#N/A
Knstrn	3.1	2.1	0.5579	0.4327	0.6836	FALSE	#N/A
Pcna	3.1	2.1	0.5579	0.4327	0.6836	FALSE	7.5636
Nono	68.7	46.5	0.5632	0.002947	0.01296	FALSE	7.3539
Mcm2	2.2	1.5	0.5668	0.4937	0.7538	FALSE	10.8259
Cand1	27.9	18.8	0.5672	0.03725	0.09933	FALSE	11.7541
Srek1ip1	6.4	4.3	0.5696	0.2701	0.4741	FALSE	#N/A
Junb	20	13.3	0.5785	0.05395	0.1335	FALSE	7.1877
Wdr18	5.8	3.8	0.5795	0.2822	0.4916	FALSE	9.0686
Actc1	31.5	21	0.5805	0.01643	0.05237	FALSE	6.9564
Bmp2k	2.7	1.8	0.5807	0.4421	0.6954	FALSE	6.8592
Vcp	3	2	0.5829	0.4225	0.6737	FALSE	13.1612
Farp1	2.3	1.5	0.5852	0.4776	0.7341	FALSE	#N/A
Nob1	2.3	1.5	0.5852	0.4776	0.7341	FALSE	10.1353
Rpl6	27.3	18.2	0.5862	0.0443	0.116	FALSE	7.4828
Mmtag2	27.6	18.3	0.5871	0.02608	0.07692	FALSE	#N/A
Lsg1	2.8	1.8	0.5958	0.4294	0.68	FALSE	10.1205
Atg2b	21	13.8	0.5963	0.04684	0.1219	FALSE	10.6069
Rrp12	17.3	11.4	0.5984	0.06316	0.1482	FALSE	10.6433
Cct5	8.3	5.4	0.5998	0.1888	0.3495	FALSE	7.1943
H1f0	82.6	54.4	0.6026	0.007564	0.02772	FALSE	8.2611
Ik	12.2	8	0.6047	0.1458	0.2809	FALSE	10.3721
Rpl35	16.9	11	0.6086	0.06926	0.1592	FALSE	13.3627
Hk2	2.4	1.5	0.6112	0.4503	0.6996	FALSE	#N/A
Nhp2	6.1	4	0.6113	0.248	0.4417	FALSE	#N/A
Ssfa2	2.9	1.8	0.6165	0.4072	0.6599	FALSE	8.0496
Pc	638.9	414.8	0.6228	0.001444	0.0071	FALSE	#N/A
Krt16	22.1	14.3	0.6235	0.04436	0.116	FALSE	6.716
Myo1c	9.5	6.1	0.6277	0.1494	0.2861	FALSE	7.2607
Tceb3	5.2	3.3	0.6285	0.2708	0.4749	FALSE	7.7455
Snw1	33.5	21.6	0.6293	0.01939	0.06005	FALSE	7.3797
Ncl	125.8	81.2	0.6303	1.5e-07	2.21e-06	FALSE	11.6531
H2afy2	3.9	2.5	0.6364	0.3314	0.5591	FALSE	6.9028
Pcm1	55.6	35.7	0.6389	0.009709	0.03416	FALSE	6.9173
Atp5b	2.9	1.8	0.6399	0.401	0.6543	FALSE	13.4943
Camk2d	2.4	1.5	0.6446	0.4236	0.6741	FALSE	7.0273
Camk2g	2.4	1.5	0.6446	0.4236	0.6741	FALSE	8.1818
Dnajb1	18.5	11.8	0.6475	0.03898	0.1036	FALSE	12.288
Trap1	12.7	8.1	0.6524	0.08246	0.1864	FALSE	10.6633
Rps6	22.6	14.2	0.659	0.02652	0.07815	FALSE	11.0153
Hsp90b1	10.7	6.7	0.6702	0.1021	0.2234	FALSE	12.8374
Luc7l3	5.8	3.6	0.6703	0.2212	0.4024	FALSE	#N/A
Rps2	19.6	12.3	0.6718	0.03272	0.09017	FALSE	13.6581
Lgals1	4.3	2.6	0.6734	0.2829	0.492	FALSE	10.0777
Snapc4	1.1	0.6	0.676	0.5532	0.8181	FALSE	9.4382
Mta2	8.3	5.1	0.6887	0.1363	0.2663	FALSE	11.1896
Rps8	48.8	30.1	0.6957	0.003446	0.0145	FALSE	13.0953
Rpl23a	32	19.7	0.6968	0.02199	0.06747	FALSE	#N/A
Znf281	7.3	4.5	0.6969	0.1565	0.2979	FALSE	#N/A
Ubn2	1.5	0.8	0.6984	0.4892	0.7475	FALSE	#N/A
Rpl11	18.1	11	0.7042	0.02762	0.07922	FALSE	#N/A
FAM120A	8.2	5	0.7056	0.1296	0.2561	FALSE	7.4688
LAP2B	37.6	23	0.7069	0.002251	0.01026	FALSE	#N/A
Ccdc94	1.5	0.9	0.7069	0.4736	0.7295	FALSE	7.5422
Ddx5	66.6	40.7	0.7072	2.8e-05	0.000243	FALSE	6.779
Atl3	1.5	0.9	0.7075	0.4732	0.7295	FALSE	7.6368
Nudcd3	1.5	0.9	0.7075	0.4732	0.7295	FALSE	7.8026
CASP	9.2	5.6	0.708	0.1105	0.233	FALSE	#N/A
Setbp1	1.5	0.9	0.7081	0.4729	0.7295	FALSE	6.7923
Pcca	592.5	362.4	0.7091	0.001008	0.005198	FALSE	8.466
Phrf1	1.1	0.6	0.7109	0.5309	0.7927	FALSE	10.9135
Msh6	7.8	4.7	0.7114	0.137	0.2674	FALSE	11.8972
Arglu1	45.6	27.8	0.712	0.004256	0.01734	FALSE	11.9601
Fip1l1	29.1	17.7	0.7128	0.005161	0.02043	FALSE	8.1615
Kif1b	3.5	2.1	0.7143	0.3031	0.5177	FALSE	9.8217
Dync1h1	87.7	53.2	0.7199	0.06779	0.1564	FALSE	9.2382
Wapl	8.2	4.9	0.7208	0.1262	0.2504	FALSE	#N/A
Parp1	6.1	3.7	0.7213	0.1852	0.344	FALSE	12.8251
Dvl2	8.9	5.3	0.7239	0.1084	0.233	FALSE	6.8416
Vps72	1.6	0.9	0.7323	0.4561	0.7072	FALSE	7.9749
Acacb	160.1	96.2	0.7342	9.21e-11	2.45e-09	FALSE	7.3097
Arl6ip4	18.2	10.9	0.7376	0.02798	0.07987	FALSE	12.647
Rad18	5.8	3.4	0.7449	0.1823	0.3388	FALSE	7.2711
Smarca4	14.1	8.3	0.7452	0.04148	0.1098	FALSE	9.5938
Ltv1	9.4	5.6	0.7468	0.09197	0.2033	FALSE	9.3237
Huwe1	16.5	9.8	0.7478	0.03019	0.08468	FALSE	8.1157
Krt19	8.7	5.1	0.7557	0.0997	0.2191	FALSE	6.7363
Cltc	26.1	15.4	0.756	0.02439	0.07293	FALSE	7.939
Nop58	42.6	25.1	0.7617	0.02095	0.06446	FALSE	#N/A
Dvl3	11.9	7	0.7645	0.05362	0.1335	FALSE	6.8707
Top1	65.4	38.4	0.7657	0.003123	0.01351	FALSE	7.3535
Srrm2	187	109.8	0.7678	0.07438	0.1696	FALSE	11.8788
Sugp1	23.4	13.7	0.768	0.00939	0.03314	FALSE	#N/A
Gnl3	105.7	62	0.7689	0.0001094	0.0008042	FALSE	12.846
Eif4e	1.1	0.6	0.7728	0.504	0.7649	FALSE	7.5548
Actbl2	14	8.1	0.7777	0.0336	0.09237	FALSE	6.7062
Rpl7a	11.3	6.5	0.7777	0.06383	0.1485	FALSE	7.0323
Taok1	10.9	6.3	0.7882	0.05793	0.1417	FALSE	9.5881
Stip1	16.4	9.4	0.7894	0.02234	0.06844	FALSE	11.5336
Rbbp6	48.2	27.8	0.7896	0.0232	0.07071	FALSE	7.3074
Nfrkb	6.1	3.4	0.7998	0.1435	0.277	FALSE	10.7523
Hnrnpf	41.7	23.9	0.8	0.0003383	0.002104	FALSE	7.3944
Ckap2	4.2	2.4	0.8	0.216	0.3945	FALSE	6.844
CX056	11.3	6.5	0.8003	0.04967	0.1283	FALSE	#N/A
Ankrd17	58.4	33.5	0.8004	0.0007748	0.004165	FALSE	7.3945
Celf1	1.6	0.8	0.801	0.4202	0.6705	FALSE	#N/A
Supt5h	1.6	0.8	0.8017	0.4197	0.6702	FALSE	9.8433
Eif4enif1	18.7	10.7	0.8043	0.01279	0.04353	FALSE	9.0029
Ilk	1.1	0.6	0.8069	0.4831	0.7401	FALSE	10.1784
Krt2	37.9	21.6	0.8076	0.0008919	0.004696	FALSE	6.6804
Cux1	18.7	10.6	0.8078	0.02372	0.07211	FALSE	7.6841
Rpl26	10	5.7	0.8083	0.06683	0.1547	FALSE	12.4994
Cenpe	1.1	0.6	0.8086	0.4823	0.7394	FALSE	6.6764
Leo1	2.7	1.5	0.8092	0.3093	0.5261	FALSE	8.8581
Tox4	25.3	14.4	0.8103	0.003774	0.01576	FALSE	#N/A
Mccc1	568.7	323.5	0.8137	0.001228	0.006155	FALSE	7.0226
Fam133b	2.3	1.2	0.816	0.3399	0.5714	FALSE	#N/A
Smg7	2.3	1.2	0.816	0.3399	0.5714	FALSE	10.9465
Hsp90ab1	110.6	62.6	0.8199	8.87e-09	1.6e-07	FALSE	13.3623
Krt73	29.4	16.6	0.8255	0.001814	0.008501	FALSE	6.8107
Ppp1ca	4.8	2.6	0.8303	0.1784	0.3334	FALSE	12.9077
Cfl1	17.7	9.9	0.8333	0.01163	0.04013	FALSE	7.9105
Hnrnpul2	4.8	2.6	0.8335	0.1725	0.3245	FALSE	#N/A
Krt76	17.3	9.6	0.8346	0.01261	0.04304	FALSE	#N/A
Rnf219	2.6	1.4	0.8388	0.2966	0.509	FALSE	10.2574
Rpl14	9.7	5.4	0.8439	0.05646	0.139	FALSE	7.2258
Noc2l	1.2	0.6	0.8444	0.4478	0.6993	FALSE	11.745
Hsp90aa1	69.3	38.5	0.8449	8e-07	1.02e-05	FALSE	8.3409
Krt14	33.8	18.7	0.849	0.0006767	0.003734	FALSE	6.8807
Krt5	39.9	22	0.8553	0.0004211	0.002552	FALSE	6.7802
Son	109	60.1	0.857	0.0213	0.06542	FALSE	7.0451
Mms19	3.3	1.8	0.8572	0.2369	0.4248	FALSE	7.045
Gpatch4	14	7.6	0.8603	0.02532	0.07536	FALSE	8.7066
Fscn1	9.2	5	0.8635	0.05705	0.1401	FALSE	10.5255
Rpl23	15.2	8.3	0.8647	0.01849	0.05768	FALSE	13.2699
Rpl13a	5.3	2.8	0.8647	0.1455	0.2806	FALSE	12.0978
Rsl1d1	35	19.1	0.8676	0.000565	0.003234	FALSE	9.4055
Akap8	2.3	1.2	0.8681	0.314	0.5332	FALSE	8.2393
Mecp2	2.3	1.2	0.8681	0.314	0.5332	FALSE	8.53
Tcof1	94	51.4	0.8712	5.63e-06	5.86e-05	FALSE	10.2452
Pds5b	6.1	3.3	0.873	0.1174	0.2451	FALSE	#N/A
Ascc3	0.7	0.3	0.8779	0.5136	0.7754	FALSE	7.6063
Ccar2	0.7	0.3	0.8779	0.5136	0.7754	FALSE	#N/A
Smtn	0.7	0.3	0.8779	0.5136	0.7754	FALSE	8.6878
Zcchc9	0.7	0.3	0.8779	0.5136	0.7754	FALSE	7.1155
Tpx2	30.4	16.5	0.8796	0.001682	0.008115	FALSE	8.6404
Knop1	44.3	24	0.8805	0.0001966	0.00134	FALSE	#N/A
Kpna2	11.1	5.9	0.885	0.03393	0.093	FALSE	6.6681
Krt75	25.7	13.9	0.8852	0.001835	0.008582	FALSE	6.9664
Rpl12	3.9	2.1	0.8873	0.1883	0.3488	FALSE	13.1763
Acaca	1438	776.3	0.8889	2.88e-09	5.77e-08	FALSE	#N/A
Eif2s3x	6.7	3.5	0.8957	0.09058	0.2008	FALSE	9.6477
Scaf1	3	1.6	0.8963	0.2425	0.4326	FALSE	7.7331
Krt42	25.3	13.5	0.8976	0.003171	0.01369	FALSE	6.7584
Ppp1r37	3.5	1.8	0.9012	0.2092	0.3835	FALSE	#N/A
Lrpprc	2.4	1.2	0.9019	0.2849	0.4941	FALSE	8.5803
Rnps1	2.4	1.2	0.9019	0.2849	0.4941	FALSE	11.5614
Ppp1cb	2.8	1.5	0.9066	0.2494	0.4424	FALSE	7.2722
Tnpo3	1.2	0.6	0.9086	0.423	0.6741	FALSE	10.4165
Hist1h1e	189.9	100.9	0.9111	0.001098	0.005578	FALSE	6.6827
Smarca5	47.7	25.3	0.9129	9.32e-06	9.12e-05	FALSE	7.1011
Gatad2a	4	2.1	0.9151	0.1747	0.3282	FALSE	#N/A
Lyar	37.8	19.9	0.9259	0.007774	0.02839	FALSE	9.6483
Nxf1	2.9	1.5	0.926	0.2358	0.4236	FALSE	9.0542
Prpf4b	9.3	4.8	0.9288	0.0576	0.141	FALSE	7.2642
Krt77	32.6	17.1	0.929	0.0006815	0.003743	FALSE	6.7
Ddx41	6.4	3.3	0.9296	0.08765	0.1953	FALSE	10.3524
Krt10	52.8	27.6	0.9312	0.0003269	0.002044	FALSE	10.1983
Rpl10	31.1	16.2	0.9357	0.0002581	0.001659	FALSE	#N/A
Rps19bp1	3	1.5	0.938	0.2237	0.4059	FALSE	9.033
Psmd4	35.9	18.7	0.9396	9.99e-05	0.0007441	FALSE	13.3147
Nudcd2	2.3	1.1	0.94	0.2786	0.4857	FALSE	7.6281
Pdcd11	15.6	8.1	0.9402	0.009199	0.03272	FALSE	8.237
Eif3d	10.8	5.6	0.941	0.02765	0.07922	FALSE	13.3808
Pnn	34.1	17.7	0.9411	0.0001612	0.00113	FALSE	6.7483
Ctif	1.2	0.6	0.9413	0.4043	0.6556	FALSE	#N/A
Kmt2c	1.2	0.6	0.9413	0.4043	0.6556	FALSE	#N/A
Myl12b	1.2	0.6	0.9413	0.4043	0.6556	FALSE	#N/A
Nup160	1.2	0.6	0.9413	0.4043	0.6556	FALSE	8.6035
Psmd6	1.2	0.6	0.9413	0.4043	0.6556	FALSE	7.0177
Rfc2	1.2	0.6	0.9413	0.4043	0.6556	FALSE	11.6899
Tars	1.2	0.6	0.9413	0.4043	0.6556	FALSE	8.0599
Kif1c	3.1	1.6	0.9447	0.2125	0.3883	FALSE	7.1997
Fam32a	7.6	3.9	0.9458	0.06264	0.1475	FALSE	#N/A
Slc25a3	7	3.6	0.9474	0.06936	0.1593	FALSE	9.8764
Nol10	2.4	1.2	0.954	0.262	0.4608	FALSE	11.2835
G3bp1	25.1	12.9	0.9541	0.0008108	0.004338	FALSE	13.6569
Iws1	3.1	1.6	0.9571	0.206	0.3783	FALSE	6.7782
Ints12	1.8	0.8	0.9586	0.3236	0.5475	FALSE	7.8793
Hist1h1b	206	105.1	0.9694	0.0005349	0.003075	FALSE	8.0291
Kifc1	2.4	1.2	0.9704	0.2528	0.4469	FALSE	8.9136
Krt4	12.6	6.4	0.9707	0.01492	0.04877	FALSE	6.9984
Rpl8	10.9	5.5	0.9754	0.02905	0.08243	FALSE	#N/A
Top2b	35	17.7	0.9818	7.61e-05	0.0005857	FALSE	6.9753
Xrn1	24.8	12.5	0.9819	0.002985	0.01308	FALSE	6.8106
Ep400	9.2	4.6	0.9819	0.04078	0.1081	FALSE	11.2668
Ddx18	10.2	5.1	0.9844	0.02535	0.07537	FALSE	#N/A
Zeb1	2.9	1.4	0.993	0.2075	0.3807	FALSE	9.1578
Dstn	3.6	1.7	0.9954	0.1641	0.3105	FALSE	10.52
Nop16	5.1	2.5	0.9964	0.1035	0.2263	FALSE	#N/A
Dzip1l	1.9	0.9	0.9972	0.2906	0.5002	FALSE	#N/A
Nop2	23.5	11.6	1.003	0.0008125	0.004338	FALSE	#N/A
Znf318	4.3	2.1	1.004	0.1297	0.2561	FALSE	#N/A
Hist1h1c	207	102.9	1.007	0.0005221	0.003041	FALSE	9.0122
Zfhx3	10.7	5.3	1.007	0.01984	0.06121	FALSE	9.1624
Tmem263	2.4	1.1	1.009	0.2398	0.4292	FALSE	#N/A
Rbm14	2.4	1.1	1.009	0.2399	0.4292	FALSE	7.7291
Ppib	2.7	1.3	1.01	0.2193	0.3999	FALSE	11.4572
Pold1	2.5	1.2	1.014	0.2303	0.4153	FALSE	11.4762
Mybbp1a	234.3	115.9	1.015	5.56e-16	3.05e-14	FALSE	11.5292
Gtf2e2	3	1.4	1.021	0.1911	0.3536	FALSE	11.1176
Larp7	20.8	10.1	1.024	0.01049	0.03664	FALSE	7.021
rp9	34.3	16.8	1.026	0.0001247	0.0008966	FALSE	10.087
Srrm1	16.2	7.9	1.027	0.005602	0.02192	FALSE	7.1959
Krt17	23.6	11.5	1.028	0.001073	0.005487	FALSE	6.7536
Rps24	6.3	3	1.03	0.06743	0.1558	FALSE	13.3093
Rps12	8.1	3.9	1.033	0.03657	0.09809	FALSE	13.5087
Hist1h1d	210.3	102.6	1.035	0.0003914	0.002383	FALSE	7.0587
Rpl4	30.9	15	1.035	0.00175	0.008404	FALSE	11.0272
Mbnl2	0.7	0.3	1.038	0.4493	0.6993	FALSE	8.831
Sct	0.7	0.3	1.038	0.4493	0.6993	FALSE	8.781
Cdk9	0.7	0.3	1.04	0.4487	0.6993	FALSE	8.0074
Lemd3	0.7	0.3	1.04	0.4487	0.6993	FALSE	#N/A
Scfd1	0.7	0.3	1.04	0.4487	0.6993	FALSE	7.2281
Ncor2	26.4	12.8	1.042	0.01659	0.05278	FALSE	#N/A
Nfatc1	4.3	2	1.042	0.1237	0.2498	FALSE	7.2267
Larp4b	1.4	0.6	1.042	0.335	0.5644	FALSE	#N/A
Rpl3	36.2	17.4	1.046	1.71e-05	0.0001582	FALSE	13.4552
Gkap1	2.6	1.2	1.046	0.2166	0.3952	FALSE	8.2133
Gtf2i	36.2	17.4	1.049	4.26e-05	0.0003429	FALSE	13.4632
Rpl5	26.1	12.5	1.058	0.0005337	0.003075	FALSE	#N/A
Top2a	27.3	13	1.067	0.0001569	0.001104	FALSE	8.6312
Lmnb1	1.9	0.8	1.067	0.2636	0.4634	FALSE	12.8969
Grn	0.8	0.3	1.067	0.4161	0.6658	FALSE	9.5619
Snu13	0.8	0.3	1.067	0.4161	0.6658	FALSE	#N/A
Tbcd	0.8	0.3	1.067	0.4161	0.6658	FALSE	9.9173
Gtf2f1	4.3	2	1.068	0.111	0.2334	FALSE	10.3391
Gnb2l1	24.6	11.6	1.069	0.000284	0.001805	FALSE	8.051
Gon4l	1.4	0.6	1.069	0.3205	0.5427	FALSE	#N/A
Smchd1	58.6	27.7	1.079	1.44e-05	0.0001365	FALSE	7.5992
Msh2	3.8	1.7	1.08	0.1259	0.25	FALSE	7.6091
Pcyt1a	2.7	1.2	1.085	0.1855	0.3442	FALSE	8.3005
Prpf40a	17.1	8	1.087	0.002719	0.01208	FALSE	7.6056
Eif3e	1.9	0.8	1.087	0.2532	0.4471	FALSE	#N/A
Tmpo	60.4	28.3	1.091	1.32e-07	1.98e-06	FALSE	7.4758
Eif4a1	15.4	7.2	1.093	0.003049	0.01334	FALSE	13.3459
Fam111a	4.8	2.2	1.093	0.08795	0.1957	FALSE	#N/A
Rrbp1	35.9	16.7	1.096	0.0002563	0.001652	FALSE	8.9981
Rbm28	2.1	0.9	1.097	0.2379	0.4263	FALSE	11.2393
Znf148	30.3	14.1	1.098	0.0002545	0.001645	FALSE	#N/A
Rpl10a	2.8	1.2	1.1	0.1787	0.3338	FALSE	13.0702
Rfc1	6.4	2.9	1.103	0.0485	0.1258	FALSE	11.1529
Znf516	22.2	10.2	1.106	0.01625	0.05186	FALSE	#N/A
Hnrnph1	22.8	10.5	1.109	0.0003082	0.001948	FALSE	9.8806
Ncor1	19.4	8.9	1.111	0.01332	0.04493	FALSE	9.4042
Rpl36a	8	3.6	1.111	0.02815	0.08017	FALSE	12.9602
Krt6a	32.8	15.1	1.115	8.26e-05	0.0006291	FALSE	6.6825
Mapre2	11.1	5	1.115	0.01015	0.0356	FALSE	9.0628
Kif16b	2.1	0.9	1.116	0.2289	0.4137	FALSE	6.7839
Gpkow	2.8	1.2	1.124	0.1691	0.3187	FALSE	6.7372
Fen1	7.1	3.2	1.141	0.0339	0.093	FALSE	12.072
Nup188	2	0.8	1.148	0.2234	0.4057	FALSE	6.6088
Rpl27a	8.7	3.9	1.152	0.018	0.05651	FALSE	13.1434
[truncated: 302 more rows]

## Sheet: 3T3_Test
	Twist1	GFP	LogFC	p.value	adjp	DEP	Log2 expression in E9.5 head tissue Wnt1-Cre NCC
Tcf3	31.4	0	7.979	3.61e-13	8.31e-10	TRUE	10.4376
Twist1	738.8	2.5	8.147	5.69e-11	6.55e-08	TRUE	10.2674
Rdx	0	29.1	-7.868	1.23e-10	9.4e-08	TRUE	6.7029
Mprip	0.4	27.7	-5.819	4.28e-10	1.97e-07	TRUE	8.9151
Lima1	3.5	48.9	-3.776	4.53e-10	1.97e-07	TRUE	10.1701
Vim	50.2	258.6	-2.363	5.13e-10	1.97e-07	TRUE	8.2575
Tln1	55	317.6	-2.526	1.03e-09	3.38e-07	TRUE	6.6826
Ppp1r12a	0	19.7	-7.308	3.19e-09	8.82e-07	TRUE	9.4236
Cobll1	11.7	125.5	-3.405	3.45e-09	8.82e-07	TRUE	6.8657
Rai14	22.2	133.1	-2.58	4.06e-09	9.35e-07	TRUE	11.017
Tcf12	27.4	0.6	5.209	5.92e-09	1.17e-06	TRUE	8.6124
Hnrnpm	256.1	60.3	2.085	6.09e-09	1.17e-06	TRUE	#N/A
Wiz	72.8	11.8	2.613	7.77e-09	1.38e-06	TRUE	8.8203
Tnks1bp1	4	114.1	-4.806	1.27e-08	2.08e-06	TRUE	6.8647
Map1a	2.7	51.7	-4.192	1.87e-08	2.87e-06	TRUE	#N/A
Dnajc7	32.4	1.5	4.288	2.76e-08	3.97e-06	TRUE	11.1894
Ezr	0	19.5	-7.293	4.23e-08	5.73e-06	TRUE	#N/A
Twist2	287.3	1.9	7.177	6.2e-08	7.2e-06	TRUE	7.5193
Synpo	1	25.8	-4.517	6.41e-08	7.2e-06	TRUE	9.6687
Phactr4	0	12.4	-6.651	6.74e-08	7.2e-06	TRUE	10.9559
Dbn1	0	12.7	-6.678	6.78e-08	7.2e-06	TRUE	8.3814
Tacc2	0	11.8	-6.581	6.89e-08	7.2e-06	TRUE	6.8771
Tjp1	9	67.2	-2.886	2.85e-07	2.85e-05	TRUE	7.3356
Tjp2	3.7	35.8	-3.242	3.23e-07	3.09e-05	TRUE	9.0622
Prph	3.1	30.1	-3.221	5.3e-07	4.88e-05	TRUE	6.8103
Nvl	21.5	1.8	3.463	6.83e-07	6.04e-05	TRUE	9.4114
Pbrm1	10.7	0	6.436	7.58e-07	6.46e-05	TRUE	11.8479
Flna	47.9	247.7	-2.367	8.12e-07	6.68e-05	TRUE	9.2083
Swap70	2.7	25.7	-3.205	9.14e-07	7.25e-05	TRUE	9.3367
Crabp1	16.7	0.9	3.989	1.26e-06	9.64e-05	TRUE	12.5656
Macf1	1.4	24.3	-3.991	1.76e-06	0.0001306	TRUE	9.0481
Triobp	0	12.6	-6.669	1.82e-06	0.0001309	TRUE	10.7022
Tacc1	0	8.3	-6.069	2.36e-06	0.0001643	TRUE	7.7832
Rbm19	8.4	0	6.085	2.99e-06	0.0002025	TRUE	8.3378
Uhrf1	8.3	0	6.07	3.46e-06	0.0002221	TRUE	12.4859
Cttnbp2nl	0.4	12.6	-4.686	3.48e-06	0.0002221	TRUE	8.9715
Dab2	6.7	61	-3.161	3.75e-06	0.0002333	TRUE	9.3145
Mllt4	42.5	182.3	-2.096	5.45e-06	0.0003201	TRUE	10.5563
Specc1	0	8.8	-6.166	5.67e-06	0.0003201	TRUE	9.5376
Plec	166.1	503.3	-1.599	5.73e-06	0.0003201	TRUE	#N/A
Cd2ap	1.7	19.7	-3.406	5.91e-06	0.0003201	TRUE	7.0758
Ubtf	18.3	1.5	3.493	5.91e-06	0.0003201	TRUE	12.0062
Zyx	27.7	133.8	-2.266	6.06e-06	0.0003201	TRUE	11.5773
Palm	0	8.7	-6.143	6.12e-06	0.0003201	TRUE	9.7959
Obsl1	23.1	3	2.874	7.03e-06	0.0003594	TRUE	7.1331
Tcf4	13.4	0.3	4.907	7.62e-06	0.00037	TRUE	11.5802
Ptpn23	1.3	21.6	-3.895	7.64e-06	0.00037	TRUE	7.0152
Dnaja2	24.1	1.5	3.906	7.72e-06	0.00037	TRUE	8.2722
Gsn	0.7	13.3	-4.013	8.09e-06	0.0003801	TRUE	6.7931
Hsp90ab1	124.2	34.8	1.83	8.49e-06	0.0003907	TRUE	13.3623
Tp53bp2	0	7.2	-5.872	9.53e-06	0.0004179	TRUE	#N/A
Lrrfip1	1.7	24	-3.691	9.66e-06	0.0004179	TRUE	7.9937
Ehbp1l1	0	11.9	-6.59	9.8e-06	0.0004179	TRUE	7.0063
Map1b	14.4	74.7	-2.36	9.81e-06	0.0004179	TRUE	#N/A
Ctps1	4.4	33.1	-2.87	1.04e-05	0.0004297	TRUE	#N/A
Eps15	0.6	12.2	-4.022	1.05e-05	0.0004297	TRUE	7.3344
G6pdx	1.3	15.8	-3.445	1.19e-05	0.0004735	TRUE	7.5577
Myef2	11.9	0.6	4.01	1.19e-05	0.0004735	TRUE	7.7025
Sh3kbp1	11.6	50.5	-2.115	1.33e-05	0.0005194	TRUE	8.3371
Kpna2	21.3	1.2	3.998	1.43e-05	0.0005423	TRUE	6.6681
Strn	0.4	10	-4.356	1.44e-05	0.0005423	TRUE	7.3804
Aatf	6.5	0	5.727	1.61e-05	0.0005981	TRUE	8.5581
Itsn1	0	7.2	-5.867	1.71e-05	0.000626	TRUE	6.8508
Wasf2	0	6.4	-5.706	1.75e-05	0.0006302	TRUE	9.9249
Dpysl3	10.3	49.8	-2.26	1.78e-05	0.0006302	TRUE	8.7909
Rrp1b	6.4	0	5.704	1.82e-05	0.0006334	TRUE	10.8665
St13	9	0	6.194	1.9e-05	0.0006518	TRUE	8.691
Smchd1	58.5	13.5	2.111	2.01e-05	0.0006796	TRUE	7.5992
Vapb	0	7.2	-5.878	2.27e-05	0.0007568	TRUE	10.7553
Ubn1	6.5	0	5.729	2.47e-05	0.0008107	TRUE	6.9409
Samd1	10	0	6.346	3.11e-05	0.001007	TRUE	7.3693
Kif5b	0.7	11.5	-3.807	3.31e-05	0.001059	TRUE	7.1666
Lpp	46.7	173	-1.888	3.39e-05	0.001069	TRUE	6.9282
Prrx1	22	3.1	2.787	3.74e-05	0.001157	TRUE	9.0936
Stam2	6.1	29.2	-2.228	3.77e-05	0.001157	TRUE	6.9875
Aacs	2	18.5	-3.106	4.25e-05	0.001285	TRUE	9.2846
Mcm3	8.2	0.3	4.367	4.89e-05	0.001444	TRUE	7.6483
Mkl2	0	6	-5.604	4.92e-05	0.001444	TRUE	6.91
Bop1	20.8	2.1	3.264	4.96e-05	0.001444	TRUE	9.9095
Hspa1a	123.6	12.3	3.318	6.07e-05	0.001747	TRUE	6.9255
Eef2k	0	5.5	-5.484	6.41e-05	0.001821	TRUE	7.8714
Polr2m	1.3	12.5	-3.109	6.81e-05	0.00191	TRUE	#N/A
Anxa6	0	8.9	-6.171	7.02e-05	0.001931	TRUE	7.7838
Lmna	96.6	33	1.544	7.05e-05	0.001931	TRUE	8.8199
Klc2	0	5.8	-5.558	7.25e-05	0.001963	TRUE	6.8795
Golga2	0.7	9.8	-3.578	7.57e-05	0.002013	TRUE	10.2203
Ehbp1	0	6.1	-5.639	7.67e-05	0.002013	TRUE	8.019
Sfr1	28.6	3.6	2.949	7.7e-05	0.002013	TRUE	#N/A
Sorbs1	0	5.6	-5.525	7.8e-05	0.002013	TRUE	6.942
Vcl	1.3	20.1	-3.791	7.87e-05	0.002013	TRUE	9.8671
Esyt1	0	5.2	-5.402	8.49e-05	0.002136	TRUE	#N/A
Whsc1l1	13.6	0.6	4.323	8.57e-05	0.002136	TRUE	10.5919
Raly	16.9	2.1	2.937	8.63e-05	0.002136	TRUE	12.2974
Leo1	5.1	0	5.382	8.84e-05	0.002163	TRUE	8.8581
Ehd1	0	5.1	-5.39	9.4e-05	0.002265	TRUE	8.2457
Synj1	0	5.8	-5.567	9.56e-05	0.002265	TRUE	6.664
Reps1	0.7	9.5	-3.535	9.56e-05	0.002265	TRUE	10.721
Hsp90aa1	63.3	17.7	1.829	9.73e-05	0.002265	TRUE	8.3409
Cttn	68.7	184.9	-1.427	9.8e-05	0.002265	FALSE	7.1237
Golga5	0	5.9	-5.601	9.84e-05	0.002265	TRUE	7.5793
Acaca	328.6	81.5	2.009	0.0001033	0.002326	TRUE	#N/A
Msn	7.8	39.6	-2.327	0.0001041	0.002326	TRUE	7.7925
Ebna1bp2	5.1	0	5.391	0.0001041	0.002326	TRUE	11.5679
Pom121	0.3	7.6	-4.065	0.000112	0.002467	TRUE	9.1391
Hmg20a	5.6	0	5.513	0.0001126	0.002467	TRUE	9.344
Klc1	0	5.6	-5.516	0.0001163	0.002524	TRUE	9.1762
Tpm1	0	5.5	-5.485	0.0001179	0.002535	TRUE	11.4954
Atg3	0	4.8	-5.314	0.0001192	0.002539	TRUE	7.3635
Tln2	3.9	29.4	-2.889	0.0001403	0.002961	TRUE	7.1657
Anp32b	5.2	0	5.413	0.0001427	0.002984	TRUE	6.6674
Stub1	21.2	1.8	3.489	0.0001527	0.003166	TRUE	10.3675
Coro1b	17.2	53.1	-1.617	0.000158	0.003242	TRUE	10.1732
Ctnna1	0	4.9	-5.318	0.0001592	0.003242	TRUE	12.9972
Rps27a	204.3	39.5	2.366	0.0001761	0.003554	TRUE	11.1651
Specc1l	0.7	9.9	-3.594	0.0001883	0.003767	TRUE	12.0152
Trim47	0	4.5	-5.212	0.000195	0.003868	TRUE	6.6716
Heatr5a	0	4.9	-5.333	0.0002026	0.003985	TRUE	7.5815
Numb	0	5.5	-5.491	0.0002064	0.004026	TRUE	9.7743
Erbb2ip	1.4	17.3	-3.502	0.000211	0.004079	TRUE	7.1229
Nedd4	10.5	41.7	-1.977	0.0002135	0.004093	TRUE	8.3166
Sptan1	0.4	11.3	-4.528	0.0002343	0.004434	TRUE	#N/A
Akap2	34	119.7	-1.815	0.0002369	0.004434	TRUE	7.755
Foxm1	4.8	0	5.3	0.000237	0.004434	TRUE	8.8296
Khsrp	13.2	49.9	-1.911	0.0002431	0.004488	TRUE	8.3928
Palld	1.8	14.8	-2.97	0.0002438	0.004488	TRUE	10.6709
Nck1	1	10.1	-3.134	0.0002484	0.004536	TRUE	8.0429
Arhgap21	0.7	10.9	-3.728	0.0002607	0.004688	TRUE	10.2236
Sun2	7.7	0	5.96	0.0002623	0.004688	TRUE	#N/A
Akap12	2.5	54.1	-4.361	0.0002628	0.004688	TRUE	7.96
Hspa8	453.6	97.3	2.22	0.0002873	0.005085	TRUE	13.2564
Acbd3	0	5.3	-5.43	0.000302	0.005304	TRUE	8.7919
Add3	2.3	17.5	-2.859	0.000308	0.005356	TRUE	9.3516
Ankle2	0	5.2	-5.417	0.0003116	0.005356	TRUE	9.2238
Eef1a1	32.1	87.3	-1.44	0.0003119	0.005356	FALSE	13.5328
Snx9	0.6	12.5	-4.053	0.0003268	0.005565	TRUE	6.9253
Asap1	2.9	17.7	-2.538	0.0003289	0.005565	TRUE	#N/A
Eps15l1	1.7	11.9	-2.737	0.0003488	0.005858	TRUE	9.4744
Hspa1l	72.4	13.9	2.375	0.0003605	0.006011	TRUE	6.6973
Lsm14b	11.1	0.6	3.938	0.0003683	0.006086	TRUE	11.4287
Nexn	0	4.2	-5.117	0.0003703	0.006086	TRUE	6.8107
Runx2	8.8	0.9	3.148	0.0003822	0.006234	TRUE	6.8253
Anxa5	0	3.9	-5.026	0.0003847	0.006234	TRUE	8.1966
Syn1	0	5.6	-5.506	0.0003959	0.006371	TRUE	7.6724
Myo1e	0	4.6	-5.253	0.0004075	0.006511	TRUE	8.2017
Tpm3	0	4	-5.047	0.0004124	0.006545	TRUE	8.8591
Tpm2	0	6	-5.62	0.0004179	0.006586	TRUE	8.5884
Slc3a2	0	4.6	-5.239	0.000422	0.006605	TRUE	6.9231
Anxa2	13	39.9	-1.614	0.0004298	0.006683	TRUE	9.1496
Nifk	7.4	0.6	3.456	0.0005007	0.007733	TRUE	6.7408
Prrx2	12.8	1.8	2.749	0.0005212	0.007996	TRUE	9.3972
Fhod1	0	3.9	-4.993	0.0005667	0.008596	TRUE	10.1316
Aftph	0.4	7.9	-4.015	0.0005717	0.008596	TRUE	9.5948
Irs1	0	3.7	-4.923	0.0005738	0.008596	TRUE	7.0972
Prmt7	0.6	10.5	-3.811	0.0005783	0.008596	TRUE	11.4166
Limd1	12.1	43	-1.813	0.0005791	0.008596	TRUE	9.466
Sec31a	1.4	12.3	-2.991	0.000585	0.008598	TRUE	7.8991
Atp6v1a	0	5.3	-5.451	0.0005867	0.008598	TRUE	7.486
Hn1l	17.2	49.6	-1.519	0.0006011	0.008713	FALSE	8.8138
Prune	2.6	16.2	-2.578	0.0006021	0.008713	TRUE	9.7626
Gphn	0.4	6.1	-3.651	0.0006151	0.008836	TRUE	8.1589
Smtn	5.4	0	5.464	0.0006183	0.008836	TRUE	8.6878
Arfgap1	6.4	24.7	-1.92	0.0006302	0.008951	TRUE	9.2499
Kif20b	4.9	0	5.339	0.0006948	0.009808	TRUE	8.225
Pgrmc2	3	17.8	-2.535	0.0007118	0.009904	TRUE	9.2929
Fkbp5	5	0	5.348	0.0007185	0.009904	TRUE	9.829
Ice1	5	0	5.348	0.0007185	0.009904	TRUE	#N/A
Tmpo	95.9	40	1.258	0.0007188	0.009904	FALSE	7.4758
Tanc1	1.7	13	-2.813	0.0007325	0.01003	TRUE	7.492
Anxa1	13.6	41.8	-1.615	0.0007545	0.01027	TRUE	6.6961
Cluh	0.4	6	-3.634	0.0008434	0.01142	TRUE	#N/A
Sfpq	9.8	31.2	-1.651	0.0008639	0.01159	TRUE	#N/A
Myh9	149.7	527.4	-1.816	0.0008665	0.01159	TRUE	9.2501
LRWD1	3.4	0	4.81	0.0008764	0.01162	TRUE	#N/A
Nudt21	0	4.7	-5.257	0.0008789	0.01162	TRUE	11.3286
Dst	1.1	11.7	-3.266	0.0008834	0.01162	TRUE	7.1613
Myh11	14.3	45.1	-1.645	0.001011	0.01312	TRUE	6.7451
Txnrd1	0.3	5.7	-3.652	0.001012	0.01312	TRUE	6.8476
Map7d1	0.7	7.6	-3.216	0.001015	0.01312	TRUE	#N/A
Arhgef40	10.3	0.8	3.433	0.001045	0.01337	TRUE	#N/A
Golga4	0.3	5.5	-3.604	0.001051	0.01337	TRUE	6.9784
Dync1li1	0	4.2	-5.128	0.001052	0.01337	TRUE	7.1714
Yy1	4.2	0	5.123	0.001058	0.01337	TRUE	6.5745
Igbp1	4.4	18	-2.01	0.001082	0.01339	TRUE	10.0225
2005-09-01	0	3.3	-4.774	0.001082	0.01339	TRUE	#N/A
Mfhas1	0	4.2	-5.113	0.001082	0.01339	TRUE	7.9027
Pex14	0	4.2	-5.113	0.001082	0.01339	TRUE	9.407
Copz2	0	4	-5.057	0.001182	0.01455	TRUE	9.7782
Adnp2	3.3	0	4.78	0.00124	0.01517	TRUE	#N/A
Snrpa1	3.6	18.9	-2.338	0.001351	0.01645	TRUE	#N/A
Samhd1	0.3	6.4	-3.831	0.001378	0.01669	TRUE	8.6422
Casp3	1.8	10.9	-2.535	0.001397	0.01683	TRUE	7.3044
Dlg1	1	9.4	-3.031	0.001406	0.01685	TRUE	6.7499
Ank2	0.7	7.3	-3.219	0.001479	0.01763	TRUE	6.9248
Topbp1	3.8	0	4.983	0.001495	0.01774	TRUE	6.7009
Pc	455.6	170	1.421	0.001524	0.01799	FALSE	#N/A
Zc3h4	7.5	25.4	-1.737	0.001558	0.01829	TRUE	#N/A
Fdps	3	13.4	-2.103	0.001619	0.01871	TRUE	12.206
Rrs1	12.9	1.7	2.8	0.001619	0.01871	TRUE	7.1348
Tes	1.3	8.9	-2.653	0.001619	0.01871	TRUE	11.2285
Fblim1	0	3.6	-4.913	0.001634	0.01871	TRUE	8.1176
Ppp1r12b	0	3.6	-4.913	0.001634	0.01871	TRUE	6.7544
Safb	4.2	17.4	-2.035	0.001672	0.01905	TRUE	10.6739
Twf2	0	3.6	-4.895	0.001701	0.01929	TRUE	9.2118
Dync1li2	0.3	5.7	-3.648	0.001755	0.01978	TRUE	8.5448
Atad5	3.8	0	4.972	0.001776	0.01978	TRUE	6.5987
Ythdf1	26.5	4.5	2.531	0.001788	0.01978	TRUE	10.1035
Zfp62	3.5	0	4.868	0.001788	0.01978	TRUE	7.0273
Zfhx4	11.8	0.8	3.625	0.001788	0.01978	TRUE	#N/A
Tfe3	29.3	9	1.682	0.001873	0.02063	TRUE	#N/A
Mapre2	40	12.9	1.624	0.001942	0.02125	TRUE	9.0628
Snap23	0	3.9	-5.024	0.001954	0.02125	TRUE	9.6448
Fbl	6.6	0.6	3.204	0.001958	0.02125	TRUE	#N/A
Dnajb6	9.3	1.5	2.527	0.002011	0.02172	TRUE	10.5382
Smcr8	0.3	5.4	-3.577	0.002064	0.02219	TRUE	6.9078
Htatsf1	0	3.3	-4.782	0.002143	0.02274	TRUE	11.2857
Pola1	0	3.3	-4.782	0.002143	0.02274	TRUE	6.628
Scrib	1.1	8.8	-2.889	0.002146	0.02274	TRUE	9.7577
Jun	38	14.6	1.371	0.002155	0.02274	FALSE	7.7299
Ciapin1	0.4	4.9	-3.347	0.002184	0.02295	TRUE	12.3454
Dbnl	6.3	34.8	-2.44	0.002227	0.02329	TRUE	9.0525
Rufy1	0.7	7.3	-3.158	0.002316	0.02402	TRUE	7.3619
Tcf20	52.7	16.3	1.686	0.002319	0.02402	TRUE	7.2595
Ahsa1	0.3	5.2	-3.527	0.002328	0.02402	TRUE	9.3119
Dnm1l	1	12	-3.472	0.002353	0.02409	TRUE	9.3648
Dync1i2	0	2.8	-4.532	0.002356	0.02409	TRUE	11.2684
Dctn1	0.3	5.3	-3.564	0.002391	0.02434	TRUE	6.8977
Nfix	8	1.2	2.644	0.002455	0.02469	TRUE	6.9543
Mybbp1a	185.4	58.5	1.661	0.002455	0.02469	TRUE	11.5292
Ubr5	3.2	0	4.728	0.002463	0.02469	TRUE	9.7036
Slmap	0	2.7	-4.509	0.002468	0.02469	TRUE	9.7502
Atp6v1b2	1	9.9	-3.19	0.002532	0.02522	TRUE	11.0252
Add1	0	2.9	-4.601	0.002641	0.02618	TRUE	10.8073
Vapa	0.3	5.7	-3.65	0.002651	0.02618	TRUE	8.6884
Lig3	3.2	0	4.742	0.002682	0.02637	TRUE	9.8481
Top2a	18.1	4.6	1.93	0.002739	0.02682	TRUE	8.6312
Ahdc1	3.1	0	4.7	0.002773	0.02701	TRUE	7.41
Gorasp2	0	3	-4.659	0.002808	0.02701	TRUE	10.656
Pdcd5	0	3	-4.659	0.002808	0.02701	TRUE	8.2759
Ahcyl2	0	2.7	-4.485	0.002817	0.02701	TRUE	#N/A
Zdhhc5	0	2.7	-4.485	0.002817	0.02701	TRUE	8.7012
Mphosph10	12.3	2.4	2.309	0.002842	0.02713	TRUE	6.6733
Fam129b	0.4	8.1	-4.063	0.002911	0.02767	TRUE	11.1451
Filip1l	3.4	14	-2.013	0.002998	0.02839	TRUE	#N/A
Top2b	12	2.1	2.416	0.003017	0.02846	TRUE	6.9753
Cpeb4	0	2.8	-4.546	0.003042	0.0285	TRUE	6.7745
Ppp1r18	1.5	10.3	-2.704	0.003047	0.0285	TRUE	#N/A
Dcp1a	0	3.1	-4.684	0.003067	0.02858	TRUE	9.6168
Sec23ip	0	3	-4.636	0.003107	0.02871	TRUE	7.0518
Srp54	0	3	-4.636	0.003107	0.02871	TRUE	6.9545
Rbm10	130.1	50.3	1.368	0.00313	0.02881	FALSE	7.5356
Gnl2	43.7	13.8	1.659	0.003211	0.02914	TRUE	9.1752
Igf2r	0.7	16.9	-4.308	0.003218	0.02914	TRUE	10.491
Dvl1	2.7	0	4.49	0.003222	0.02914	TRUE	8.783
Ints9	0	2.7	-4.523	0.003229	0.02914	TRUE	7.6471
Tab3	0	2.7	-4.523	0.003229	0.02914	TRUE	#N/A
Ythdf2	16.6	4.2	1.961	0.003273	0.02942	TRUE	11.0589
Calu	0	2.9	-4.616	0.00338	0.02991	TRUE	9.7165
Clip2	0	2.9	-4.616	0.00338	0.02991	TRUE	6.9899
Stk24	0	2.9	-4.616	0.00338	0.02991	TRUE	7.8937
Tmf1	0	2.9	-4.616	0.00338	0.02991	TRUE	6.9004
Fen1	8.3	1.3	2.601	0.003429	0.03023	TRUE	12.072
Cwc25	2.8	0	4.558	0.003488	0.0304	TRUE	#N/A
Rps27	2.8	0	4.558	0.003488	0.0304	TRUE	#N/A
Znf106	2.8	0	4.558	0.003488	0.0304	TRUE	#N/A
Ints12	9.7	1.8	2.343	0.003599	0.03125	TRUE	7.8793
Kri1	2.8	0	4.542	0.003729	0.03218	TRUE	#N/A
Aak1	8.2	23.5	-1.51	0.003734	0.03218	FALSE	7.0532
Cct8	69.3	171.5	-1.305	0.003791	0.03228	FALSE	12.5305
Prdx1	7.3	24.7	-1.748	0.003798	0.03228	TRUE	13.3376
Rnmt	0	2.4	-4.359	0.003801	0.03228	TRUE	7.2925
Tex2	0	2.4	-4.359	0.003801	0.03228	TRUE	7.0643
Itsn2	0	2.5	-4.367	0.003896	0.03284	TRUE	7.2713
Osbpl11	0	2.5	-4.367	0.003896	0.03284	TRUE	7.5831
Eea1	0	2.7	-4.502	0.003944	0.03312	TRUE	6.7534
Nr2c2	7.4	1.2	2.469	0.003973	0.03324	TRUE	6.8013
Epb41l1	6.6	25.1	-1.915	0.003996	0.03332	TRUE	#N/A
Aars	1.1	7.5	-2.677	0.004023	0.03342	TRUE	11.7349
Klf5	2.4	0	4.343	0.004051	0.03353	TRUE	6.9899
Exoc3	0	3.4	-4.829	0.004069	0.03356	TRUE	9.2421
Cyb5a	0	2.9	-4.594	0.004172	0.03417	TRUE	#N/A
Ndrg1	0	2.9	-4.594	0.004172	0.03417	TRUE	7.1944
Anapc1	0	2.6	-4.468	0.004253	0.03448	TRUE	6.8835
Mkl1	0	2.6	-4.468	0.004253	0.03448	TRUE	6.7653
Patl1	10.8	1.5	2.783	0.004256	0.03448	TRUE	9.7269
Cpsf6	9.2	26.4	-1.499	0.004285	0.03459	FALSE	7.724
Arhgef18	0	2.7	-4.478	0.004368	0.0349	TRUE	9.7259
Clasp1	0	2.7	-4.478	0.004368	0.0349	TRUE	8.2191
Uso1	0	2.7	-4.478	0.004368	0.0349	TRUE	7.8609
Mcm3ap	0	2.7	-4.499	0.004414	0.03515	TRUE	6.6411
Strn4	5.8	18.3	-1.644	0.004453	0.03533	TRUE	8.6998
Sf3a1	10.4	30.1	-1.514	0.004667	0.03691	FALSE	11.5118
Igf2bp2	42	16.4	1.345	0.004706	0.03709	FALSE	11.9421
Kmt2a	26.6	4.2	2.612	0.004729	0.03714	TRUE	#N/A
Arhgap35	0	3.1	-4.702	0.004787	0.03742	TRUE	#N/A
Tab2	1.3	7.5	-2.389	0.004805	0.03742	TRUE	#N/A
Gtf2i	24	6.3	1.908	0.004813	0.03742	TRUE	13.4632
Morc3	2.3	0	4.306	0.004922	0.03801	TRUE	8.8697
Dsg1a	2.3	0	4.301	0.004922	0.03801	TRUE	6.72
Kdm2a	9.5	2.1	2.106	0.004983	0.03835	TRUE	#N/A
Synrg	0.6	5.6	-2.928	0.005064	0.03884	TRUE	#N/A
Ehmt2	2.3	0	4.282	0.005146	0.03932	TRUE	10.6416
Mecom	5.3	0.3	3.735	0.005204	0.03932	TRUE	#N/A
Cbx2	2.5	0	4.383	0.005225	0.03932	TRUE	8.8084
Incenp	2.5	0	4.383	0.005225	0.03932	TRUE	9.8432
Tfap2a	2.5	0	4.383	0.005225	0.03932	TRUE	#N/A
Arpin	16.1	47.9	-1.57	0.005235	0.03932	FALSE	#N/A
Bcat1	0	2.6	-4.454	0.005246	0.03932	TRUE	12.137
Rpap2	0	2.5	-4.375	0.00532	0.03975	TRUE	9.1525
Max	2.5	0	4.365	0.005344	0.0398	TRUE	6.8627
Mavs	0	2.4	-4.351	0.005496	0.04079	TRUE	#N/A
Tpd52l2	0.7	5.8	-2.773	0.005546	0.04103	TRUE	9.0241
Trerf1	3.7	0.3	3.245	0.005664	0.04177	TRUE	7.3899
Chd9	2.5	0	4.401	0.005683	0.04178	TRUE	7.3021
Adrbk1	0	2.8	-4.553	0.005848	0.04286	TRUE	10.9978
Bicd2	0	2.4	-4.325	0.005909	0.04302	TRUE	9.8029
Clip1	0	2.4	-4.325	0.005909	0.04302	TRUE	8.1884
Map4k5	2.5	11.9	-2.218	0.005972	0.04335	TRUE	6.8122
Abl2	0	2.2	-4.192	0.006099	0.04386	TRUE	6.658
Itgb1	0	2.2	-4.192	0.006099	0.04386	TRUE	7.7124
Notch2	0	2.2	-4.192	0.006099	0.04386	TRUE	6.7188
2009-09-01	46.8	199.9	-2.092	0.006161	0.04417	TRUE	#N/A
Flnb	11.4	53.2	-2.206	0.006248	0.04465	TRUE	8.6876
Necap2	0	2.8	-4.53	0.006348	0.04508	TRUE	8.1586
Ube2j1	0	2.8	-4.53	0.006348	0.04508	TRUE	7.0042
Ncl	196.9	97.4	1.015	0.006392	0.04525	FALSE	11.6531
Cops7a	0	2.2	-4.201	0.006513	0.04583	TRUE	9.6252
Heatr5b	0	2.2	-4.201	0.006513	0.04583	TRUE	6.9665
Cactin	22.7	6.9	1.702	0.006736	0.04725	TRUE	#N/A
Inppl1	1.7	9	-2.313	0.006849	0.0479	TRUE	12.7251
Pacsin2	0	2.3	-4.298	0.006879	0.04797	TRUE	7.4768
Pdxdc1	1.1	6.7	-2.52	0.00697	0.04804	TRUE	9.4535
Crnkl1	0	2.1	-4.172	0.006974	0.04804	TRUE	7.0232
Fnbp1	0	2.1	-4.172	0.006974	0.04804	TRUE	11.2003
Inpp5f	0	2.1	-4.172	0.006974	0.04804	TRUE	8.8535
Pard3	0.4	4	-3.066	0.007019	0.04821	TRUE	7.0904
Nr2c1	5.7	0.9	2.532	0.007069	0.04841	TRUE	6.8418
Ablim1	0	2.2	-4.23	0.00718	0.04902	TRUE	7.0141
CX056	23	7.9	1.527	0.007402	0.05039	TRUE	#N/A
Prune2	0	2.1	-4.133	0.007511	0.05098	FALSE	#N/A
Hivep3	4.6	0.3	3.533	0.007588	0.05135	TRUE	7.018
Cdc37	2.7	10.6	-1.9	0.007696	0.05188	FALSE	8.0984
Ddx24	8.9	1.5	2.442	0.00771	0.05188	TRUE	10.6291
Cntrob	2.4	0	4.329	0.007795	0.05229	TRUE	6.6675
Sipa1l3	10	28.4	-1.496	0.007974	0.05277	FALSE	7.1326
Cdr2l	0	2.1	-4.184	0.008052	0.05277	FALSE	8.876
Mtmr6	0	2.1	-4.184	0.008052	0.05277	FALSE	6.6748
Xirp2	0	2.1	-4.184	0.008052	0.05277	FALSE	6.7676
Zfyve16	0	2.1	-4.184	0.008052	0.05277	FALSE	7.177
Dnaja1	2	0	4.095	0.008065	0.05277	FALSE	6.9976
Chmp4b	1.4	7.3	-2.309	0.008066	0.05277	FALSE	10.0823
Arhgap1	0.7	5.4	-2.679	0.008098	0.05277	FALSE	10.0337
Ckap2	4.8	0.6	2.721	0.008151	0.05277	TRUE	6.844
Usp8	0.4	3.9	-3.04	0.00823	0.05277	FALSE	6.9642
Anp32a	2.1	0	4.163	0.008233	0.05277	TRUE	11.2839
Foxp4	2.1	0	4.163	0.008233	0.05277	TRUE	6.8918
Mbd3	2.1	0	4.163	0.008233	0.05277	TRUE	9.35
Sox9	2.1	0	4.163	0.008233	0.05277	TRUE	11.6405
Ttf1	2.1	0	4.163	0.008233	0.05277	TRUE	6.8564
Utp3	2.1	0	4.163	0.008233	0.05277	TRUE	6.6725
Cdc42bpb	0	2.2	-4.213	0.008357	0.0533	FALSE	10.461
Lzic	0	2.1	-4.154	0.008411	0.0533	FALSE	8.7453
Ndc1	0	2.1	-4.154	0.008411	0.0533	FALSE	#N/A
Cryab	2.1	0	4.184	0.008413	0.0533	TRUE	6.9648
Fubp1	3.3	13.5	-1.968	0.008432	0.0533	FALSE	7.9428
Usp7	6.4	1.2	2.326	0.00862	0.05434	TRUE	10.7306
Micall2	4.2	19.5	-2.168	0.00886	0.0557	FALSE	7.7499
Sin3a	2.1	0	4.143	0.008928	0.05586	TRUE	10.345
Kif2c	2.1	0	4.158	0.008952	0.05586	TRUE	11.919
Rock2	0.4	3.9	-3.024	0.008978	0.05586	FALSE	6.8557
Pip4k2c	1.4	7	-2.217	0.008983	0.05586	FALSE	9.3495
Rassf8	2.6	12.2	-2.16	0.009154	0.05664	FALSE	6.6532
Ppp1r2	1.8	8.3	-2.141	0.009156	0.05664	FALSE	10.0246
Hic2	2	0	4.067	0.009287	0.05701	FALSE	8.2411
Rexo4	2	0	4.067	0.009287	0.05701	FALSE	7.3034
Tjap1	4.4	17	-1.923	0.009292	0.05701	FALSE	10.1999
Acbd5	0	2.1	-4.124	0.009482	0.05788	FALSE	6.7861
Inf2	0	2.1	-4.124	0.009482	0.05788	FALSE	#N/A
Map4	31	98.9	-1.668	0.00968	0.05893	FALSE	#N/A
Ncor1	60.1	28.2	1.086	0.01001	0.0608	FALSE	9.4042
Dock1	0	1.9	-4.004	0.01021	0.06166	FALSE	7.4458
Txlna	0	1.9	-4.004	0.01021	0.06166	FALSE	8.4668
Rtn4	38.3	97.8	-1.35	0.01024	0.06171	FALSE	6.8575
Stau1	18	4.2	2.085	0.0103	0.06189	TRUE	9.5153
Edc4	1.7	11.4	-2.617	0.01037	0.06213	FALSE	9.9659
Igf2bp1	12.2	3.3	1.837	0.01041	0.06221	TRUE	12.1834
Numbl	0.3	3.9	-3.135	0.01045	0.06224	FALSE	7.2716
Cars	0	1.8	-3.97	0.01052	0.06224	FALSE	7.2262
Ccdc102a	0	1.8	-3.97	0.01052	0.06224	FALSE	6.942
Cd44	0	1.8	-3.97	0.01052	0.06224	FALSE	7.4022
Zfpm2	2.1	0	4.122	0.01086	0.06405	TRUE	7.0158
Bnc1	6.5	0.9	2.649	0.01092	0.06425	TRUE	6.94
Ppp1r13l	2.4	11.4	-2.204	0.01099	0.06451	FALSE	7.1197
Pak3	1.3	7.7	-2.422	0.01165	0.06799	FALSE	7.3153
Ppp1r13b	0	1.9	-4.014	0.01167	0.06799	FALSE	6.9049
Tdp1	0	1.9	-4.014	0.01167	0.06799	FALSE	7.8903
Eif3g	0	2	-4.092	0.0117	0.06799	FALSE	13.2573
Sptbn1	0.7	7.7	-3.302	0.01177	0.06819	FALSE	#N/A
Pcca	365.3	106.2	1.781	0.01181	0.06827	TRUE	8.466
Ftsj3	30.9	10.5	1.551	0.01193	0.06882	TRUE	8.1084
Phip	8.9	2.1	2	0.01202	0.06916	TRUE	7.642
Pcyt1a	6.2	1.2	2.292	0.01248	0.07163	TRUE	8.3005
Kiaa1524	4.1	12.8	-1.614	0.01259	0.07163	FALSE	#N/A
Acap2	0	1.8	-3.96	0.01264	0.07163	FALSE	6.8963
Cwc27	0	1.8	-3.96	0.01264	0.07163	FALSE	#N/A
Myo9a	0	1.8	-3.96	0.01264	0.07163	FALSE	7.8982
Znf592	0	1.8	-3.96	0.01264	0.07163	FALSE	#N/A
Sipa1	10	27.3	-1.439	0.01282	0.07247	FALSE	6.9781
Tkt	0.4	3.8	-2.99	0.0132	0.07444	FALSE	12.2387
Adar	1.7	0	3.873	0.01345	0.07547	FALSE	7.6866
Nfkb2	1.7	0	3.873	0.01345	0.07547	FALSE	6.9194
Spen	32.9	9.4	1.79	0.01352	0.07559	TRUE	7.3897
Esd	0	1.8	-3.946	0.01358	0.07559	FALSE	7.7294
Anp32e	1.8	0	3.929	0.01369	0.07559	FALSE	10.2247
Ube2c	1.8	0	3.929	0.01369	0.07559	FALSE	7.0221
Akt1s1	0	1.8	-3.925	0.01383	0.07559	FALSE	10.4127
Copz1	0	1.8	-3.925	0.01383	0.07559	FALSE	10.6073
Ist1	0	1.8	-3.925	0.01383	0.07559	FALSE	#N/A
Kiaa0754	0	1.8	-3.925	0.01383	0.07559	FALSE	#N/A
Maoa	0	1.8	-3.925	0.01383	0.07559	FALSE	6.6554
Ppp6r3	0	1.8	-3.925	0.01383	0.07559	FALSE	#N/A
Tmsb10	0	1.8	-3.925	0.01383	0.07559	FALSE	12.088
Arap1	0.6	5.9	-2.998	0.01388	0.07562	FALSE	7.0051
Lin54	14.4	3.6	1.97	0.01391	0.07562	TRUE	9.1906
Tmem131	5.9	0.6	3.147	0.01393	0.07562	TRUE	7.0519
Nop14	5.6	0.6	2.978	0.014	0.07582	TRUE	#N/A
Msl1	1.7	0	3.847	0.01416	0.07611	FALSE	#N/A
Rad54l2	1.7	0	3.847	0.01416	0.07611	FALSE	#N/A
Rrp7a	1.7	0	3.847	0.01416	0.07611	FALSE	7.1121
Nfic	1.7	0	3.904	0.01423	0.07615	FALSE	6.8362
Rps16	1.7	0	3.904	0.01423	0.07615	FALSE	13.2572
Igf2bp3	30.3	10.8	1.485	0.01427	0.07619	FALSE	12.6911
Nop56	25.7	6.3	1.999	0.01442	0.07664	TRUE	#N/A
Pxn	1	6	-2.44	0.01442	0.07664	FALSE	7.0041
Eif2ak3	0.3	3.4	-2.915	0.01448	0.07665	FALSE	7.0135
Ccdc93	0	1.7	-3.9	0.01459	0.07665	FALSE	7.0301
CQ085	0	1.7	-3.9	0.01459	0.07665	FALSE	#N/A
Stx5	0	1.7	-3.9	0.01459	0.07665	FALSE	#N/A
Taf6	0	1.7	-3.9	0.01459	0.07665	FALSE	7.9854
Kif23	5.9	0.6	3.037	0.01475	0.07729	TRUE	10.5545
Hist1h2bf	26.8	9.7	1.455	0.01487	0.07758	FALSE	9.6271
Hist1h2bh	26.8	9.7	1.455	0.01487	0.07758	FALSE	9.086
Wnk1	0.7	7.6	-3.156	0.01501	0.07816	FALSE	10.2151
2007-09-01	0.6	4.5	-2.602	0.01512	0.07855	FALSE	#N/A
Yeats2	34.5	7.6	2.163	0.01527	0.07914	TRUE	9.6515
Pgam1	2.8	13.4	-2.221	0.0155	0.08016	FALSE	9.4458
Sod1	0.4	4.2	-3.116	0.01571	0.08106	FALSE	13.355
Nudt9	0.7	4.7	-2.548	0.01593	0.08191	FALSE	9.2371
Kif1c	6.6	1.2	2.382	0.01595	0.08191	TRUE	7.1997
G3bp1	50.9	18.9	1.428	0.01623	0.08302	FALSE	13.6569
Vcp	6	1.2	2.176	0.01628	0.08302	TRUE	13.1612
Ppp4r3b	0.7	6.2	-2.921	0.01634	0.08302	FALSE	#N/A
Setx	1.7	0	3.879	0.01634	0.08302	FALSE	8.3924
Uimc1	1.7	0	3.879	0.01634	0.08302	FALSE	6.8818
Golga3	0.7	5	-2.616	0.01649	0.08355	FALSE	8.259
Arid4b	5.3	0.6	2.883	0.01666	0.08424	TRUE	6.9634
Nfrkb	11.7	3	1.922	0.01677	0.08443	TRUE	10.7523
Ccar2	1.6	0	3.815	0.01681	0.08443	FALSE	#N/A
Hsf1	1.6	0	3.815	0.01681	0.08443	FALSE	10.4322
Gnl3l	4.1	0.6	2.498	0.01695	0.08495	TRUE	7.8904
Ubn2	4.8	0.9	2.28	0.01739	0.08696	TRUE	#N/A
Utp14a	42.4	14.6	1.529	0.01774	0.08818	TRUE	7.0002
Ddx56	1.6	0	3.788	0.01774	0.08818	FALSE	6.8043
Ino80c	1.6	0	3.788	0.01774	0.08818	FALSE	10.3576
YJ005	9.4	27.2	-1.521	0.01792	0.08887	FALSE	#N/A
Slx4	16	2.9	2.418	0.01804	0.08927	TRUE	#N/A
Tpt1	5.3	0.6	2.977	0.01813	0.08955	TRUE	6.7982
Adnp	43.9	21	1.058	0.01819	0.08961	FALSE	12.0255
Crocc	0	1.6	-3.775	0.01823	0.08963	FALSE	8.5214
Myh7b	0.3	3.6	-3.028	0.01858	0.09112	FALSE	#N/A
Nr3c1	3.3	10.4	-1.592	0.01861	0.09112	FALSE	6.8613
Myh7	0.3	3.7	-3.046	0.01882	0.09172	FALSE	6.7674
Mios	0	1.6	-3.759	0.01883	0.09172	FALSE	#N/A
Ikbkap	2	7.8	-1.922	0.01885	0.09172	FALSE	9.7667
Dpysl4	0	1.6	-3.747	0.01928	0.09359	FALSE	10.5952
Znf148	30.3	11.9	1.34	0.01938	0.09388	FALSE	#N/A
Pdlim1	13.7	34.8	-1.334	0.01947	0.09413	FALSE	10.6635
Stat3	1.3	5.8	-2.017	0.0196	0.09426	FALSE	8.8424
Denr	0	1.5	-3.735	0.01975	0.09426	FALSE	8.8189
Fkbp15	0	1.5	-3.735	0.01975	0.09426	FALSE	6.6948
Micall1	0	1.5	-3.735	0.01975	0.09426	FALSE	#N/A
Thoc2	0	1.5	-3.735	0.01975	0.09426	FALSE	8.085
Znf830	0	1.5	-3.735	0.01975	0.09426	FALSE	#N/A
Pla2g4a	4.2	25	-2.549	0.02002	0.09525	FALSE	6.6671
Cct4	6.8	1.8	1.863	0.02018	0.09525	TRUE	12.5088
Emsy	8.6	2.3	1.816	0.02028	0.09525	TRUE	#N/A
Ddx5	74.1	39.3	0.9135	0.02034	0.09525	FALSE	6.779
Rif1	56.8	15.3	1.881	0.02035	0.09525	TRUE	7.2616
Alkbh3	0	1.5	-3.719	0.0204	0.09525	FALSE	9.7245
Gbe1	0	1.5	-3.719	0.0204	0.09525	FALSE	6.714
Kiaa1211	0	1.5	-3.719	0.0204	0.09525	FALSE	#N/A
Papss1	0	1.5	-3.719	0.0204	0.09525	FALSE	9.7878
Psmd8	0	1.5	-3.719	0.0204	0.09525	FALSE	12.0821
Klf4	4.8	0.6	2.762	0.02041	0.09525	TRUE	6.8336
Ptpn12	0.7	4.3	-2.402	0.02051	0.09555	FALSE	8.1576
Stam	0.3	3.8	-3.081	0.02071	0.09629	FALSE	7.0089
Chd1	4.8	0.9	2.197	0.02082	0.09659	TRUE	9.4218
Gab1	0	1.5	-3.707	0.0209	0.09665	FALSE	9.7876
Slk	25.7	97.4	-1.914	0.02101	0.09665	FALSE	8.2572
Pogz	11.1	3.6	1.612	0.02102	0.09665	TRUE	7.391
Bnc2	3.2	0.3	3.018	0.02104	0.09665	TRUE	6.9698
Mecp2	3.2	0.3	3.018	0.02104	0.09665	TRUE	8.53
Psme3	3.3	13.6	-1.977	0.02125	0.0973	FALSE	9.8361
Baz1b	52.5	22.6	1.215	0.02138	0.0973	FALSE	6.9345
Ate1	0	1.5	-3.695	0.02141	0.0973	FALSE	10.1724
Hip1r	0	1.5	-3.695	0.02141	0.0973	FALSE	6.9598
Rapgef2	0	1.5	-3.695	0.02141	0.0973	FALSE	7.3744
R3hdm2	2.7	0.3	2.826	0.02144	0.0973	TRUE	7.1721
Tardbp	11.8	4	1.542	0.02163	0.09785	TRUE	8.8715
Hnrnpa0	5.9	1.2	2.157	0.02165	0.09785	TRUE	#N/A
Nop2	16.1	5.4	1.551	0.02186	0.09864	TRUE	#N/A
Eppk1	0.4	3.6	-2.914	0.02225	0.1002	FALSE	#N/A
Hbs1l	0	1.5	-3.665	0.02267	0.1017	FALSE	10.8512
Tars	0	1.5	-3.665	0.02267	0.1017	FALSE	8.0599
Pnn	46.2	14.8	1.635	0.02275	0.1018	TRUE	6.7483
Dctn4	0	1.4	-3.653	0.02323	0.1026	FALSE	9.8603
Enah	0	1.4	-3.653	0.02323	0.1026	FALSE	8.5261
Gart	0	1.4	-3.653	0.02323	0.1026	FALSE	12.1132
Lrrc16a	0	1.4	-3.653	0.02323	0.1026	FALSE	#N/A
Rbm12	0	1.4	-3.653	0.02323	0.1026	FALSE	9.6142
Tsc1	0	1.4	-3.653	0.02323	0.1026	FALSE	7.3151
Capzb	2	8.3	-2.011	0.02324	0.1026	FALSE	9.6158
Jmjd1c	102.8	42	1.288	0.02335	0.1029	FALSE	6.7532
Twf1	1.3	5.9	-2.044	0.02342	0.103	FALSE	#N/A
Strn3	1	5.1	-2.155	0.02355	0.1034	FALSE	#N/A
Tiprl	5.8	15	-1.356	0.02374	0.1039	FALSE	6.6948
Rabgap1	0.3	3	-2.738	0.02376	0.1039	FALSE	11.1075
Apbb1ip	0.3	3	-2.745	0.0239	0.1043	FALSE	6.7314
Foxc2	2.7	0.3	2.789	0.02406	0.1049	TRUE	7.0043
Gtf2e2	4.6	0.6	2.681	0.02434	0.1052	TRUE	11.1176
Spag9	1.4	10.1	-2.77	0.02474	0.1052	FALSE	7.9258
Dnajc2	2.7	0.3	2.806	0.0248	0.1052	TRUE	10.547
Aurkaip1	1.4	0	3.618	0.02481	0.1052	FALSE	10.8841
Cdc40	1.4	0	3.618	0.02481	0.1052	FALSE	7.586
Iws1	1.4	0	3.618	0.02481	0.1052	FALSE	6.7782
Pbxip1	1.4	0	3.618	0.02481	0.1052	FALSE	#N/A
Pcbp4	1.4	0	3.618	0.02481	0.1052	FALSE	13.3292
Pdcd11	1.4	0	3.618	0.02481	0.1052	FALSE	8.237
Rps25	1.4	0	3.618	0.02481	0.1052	FALSE	12.1271
Rps7	1.4	0	3.618	0.02481	0.1052	FALSE	12.2858
Tcf7l2	1.4	0	3.618	0.02481	0.1052	FALSE	8.5352
Tead4	1.4	0	3.618	0.02481	0.1052	FALSE	7.2513
Znf512	1.4	0	3.618	0.02481	0.1052	FALSE	#N/A
Gigyf2	20.8	9.1	1.18	0.02482	0.1052	FALSE	#N/A
Rin1	0.6	3.9	-2.415	0.0252	0.1066	FALSE	7.0246
Cdc42ep4	1.6	7	-2.052	0.02534	0.107	FALSE	10.2431
Ccdc22	1	5.8	-2.446	0.02551	0.1075	FALSE	#N/A
Cog1	0.7	3.9	-2.278	0.02585	0.1087	FALSE	8.1635
Prpf38a	1.4	0	3.588	0.02628	0.1101	FALSE	10.7977
Ticrr	1.4	0	3.588	0.02628	0.1101	FALSE	#N/A
Dnajb4	2.6	0.3	2.773	0.02659	0.1112	TRUE	6.9478
Tbc1d15	2	7.7	-1.865	0.02686	0.1122	FALSE	8.1723
Trmt112	7.6	1.9	1.958	0.02701	0.1124	TRUE	#N/A
Smarce1	15.4	5.4	1.497	0.02703	0.1124	FALSE	11.869
Dap	0.4	3.4	-2.82	0.02706	0.1124	FALSE	7.6781
Cux1	27.8	8.2	1.748	0.02716	0.1126	TRUE	7.6841
Sh3bp5l	0.4	3.3	-2.801	0.02749	0.1134	FALSE	11.1842
Esf1	63.3	20.6	1.612	0.02754	0.1134	TRUE	6.6581
Map4k4	0.7	3.9	-2.29	0.0276	0.1134	FALSE	8.3876
Mia3	1	7.1	-2.63	0.02761	0.1134	FALSE	7.1294
Xrcc1	5.6	1.2	2.124	0.02763	0.1134	TRUE	10.3241
Mfap1	25.2	6.9	1.85	0.02764	0.1134	TRUE	#N/A
Rpl3	6.9	1.5	2.121	0.02771	0.1135	TRUE	13.4552
Zfhx3	11.2	2.8	1.97	0.02776	0.1135	TRUE	9.1624
Hgs	0.4	3	-2.676	0.02801	0.1142	FALSE	8.5873
Clint1	11.6	25.2	-1.114	0.02803	0.1142	FALSE	6.7874
Coro1c	1	5.1	-2.164	0.02817	0.1143	FALSE	12.3077
Gpatch2	1.3	0	3.549	0.02826	0.1143	FALSE	9.008
L3mbtl3	1.3	0	3.549	0.02826	0.1143	FALSE	7.3615
Polr1c	1.3	0	3.549	0.02826	0.1143	FALSE	11.4977
Zc3hc1	5.3	1.2	2.024	0.02834	0.1144	TRUE	12.6301
Brd7	5.5	1.2	2.116	0.02845	0.1146	TRUE	9.104
Ptbp1	11.2	2.7	1.998	0.02848	0.1146	TRUE	13.5682
Cep170	46.8	105.2	-1.168	0.02861	0.1148	FALSE	10.8924
Nav1	13.6	2.6	2.328	0.02864	0.1148	TRUE	10.892
Parp1	2.7	0.3	2.653	0.02882	0.1153	TRUE	12.8251
Ythdf3	40	9.9	2.001	0.02914	0.1164	TRUE	8.0652
Safb2	1.4	6.4	-2.089	0.02937	0.1171	FALSE	6.8551
Akap9	0.3	3.5	-2.955	0.02948	0.1172	FALSE	10.8756
Prr12	4.9	0.7	2.701	0.02948	0.1172	TRUE	7.1873
Xrn1	38.2	14.1	1.428	0.02971	0.1179	FALSE	6.8106
Slx4ip	1.3	0	3.517	0.02996	0.1185	FALSE	#N/A
Tfdp1	2.7	0.3	2.633	0.02997	0.1185	TRUE	10.1667
Lypla2	4.1	11.4	-1.448	0.03064	0.1209	FALSE	13.3267
Hn1	2	6.9	-1.697	0.03079	0.1213	FALSE	13.3323
Elf1	7.2	1.2	2.418	0.03115	0.1225	TRUE	7.4907
Acin1	13.6	42.8	-1.641	0.03139	0.1232	FALSE	8.1662
Atg2b	21.8	9.7	1.157	0.03236	0.1269	FALSE	10.6069
Arpp19	0	1.3	-3.47	0.03262	0.1276	FALSE	10.3487
Dzip1l	5.1	1.2	1.97	0.03299	0.1289	TRUE	#N/A
Sars	0.4	3.2	-2.761	0.03323	0.1296	FALSE	9.1272
Snw1	62.7	30	1.062	0.03346	0.1303	FALSE	7.3797
CA052	2.5	8.6	-1.757	0.03357	0.1305	FALSE	#N/A
Eif4b	22	77	-1.801	0.03371	0.1307	FALSE	7.381
2002-09-01	0.7	3.8	-2.257	0.03375	0.1307	FALSE	#N/A
Pdlim5	40.2	76.9	-0.9316	0.03385	0.1309	FALSE	7.4978
Kpnb1	6	1.5	1.916	0.03422	0.1318	TRUE	9.9621
Abcf2	10.6	35.1	-1.712	0.03438	0.1318	FALSE	11.774
Ubap2l	170.4	98.3	0.7924	0.03442	0.1318	FALSE	8.6983
Psmd1	2.4	0.3	2.646	0.03453	0.1318	TRUE	12.9557
Eml4	0	1.2	-3.435	0.03466	0.1318	FALSE	11.1316
Esyt2	0	1.2	-3.435	0.03466	0.1318	FALSE	#N/A
Kiaa1522	0	1.2	-3.435	0.03466	0.1318	FALSE	#N/A
Stx7	0	1.2	-3.435	0.03466	0.1318	FALSE	8.1412
Utp14b	9	2.7	1.694	0.03506	0.1318	TRUE	6.7365
Cast	7.7	51.5	-2.717	0.03512	0.1318	FALSE	6.7321
Gpkow	5.8	1.5	1.872	0.03514	0.1318	TRUE	6.7372
Lbr	20.3	6.1	1.724	0.03523	0.1318	TRUE	12.3154
H2afy	10.6	3.5	1.56	0.0355	0.1318	TRUE	11.3231
Apobr	0	1.2	-3.42	0.03557	0.1318	FALSE	#N/A
Casp9	0	1.2	-3.42	0.03557	0.1318	FALSE	9.116
Ctage5	0	1.2	-3.42	0.03557	0.1318	FALSE	10.3318
Eif3h	0	1.2	-3.42	0.03557	0.1318	FALSE	7.5499
Flot2	0	1.2	-3.42	0.03557	0.1318	FALSE	10.354
Gas2l1	0	1.2	-3.42	0.03557	0.1318	FALSE	7.7785
Lrch3	0	1.2	-3.42	0.03557	0.1318	FALSE	6.9921
Ssb	0	1.2	-3.42	0.03557	0.1318	FALSE	6.8796
Stxbp5	0	1.2	-3.42	0.03557	0.1318	FALSE	7.9287
Ten1	0	1.2	-3.42	0.03557	0.1318	FALSE	#N/A
Ubxn6	0	1.2	-3.42	0.03557	0.1318	FALSE	9.1607
Usp19	0	1.2	-3.42	0.03557	0.1318	FALSE	10.8251
Wdr44	0	1.2	-3.42	0.03557	0.1318	FALSE	6.6649
Tcp1	28.3	10.4	1.427	0.0361	0.1336	FALSE	11.5242
Eftud1	1.4	5.8	-1.94	0.03618	0.1336	FALSE	8.541
Aip	7.1	2.1	1.705	0.03689	0.136	TRUE	10.6698
Cdc5l	8.7	21.6	-1.3	0.03711	0.1364	FALSE	10.86
Bcr	4.1	0.9	2.046	0.03715	0.1364	TRUE	7.6014
Ranbp9	0.7	3.9	-2.288	0.03718	0.1364	FALSE	6.976
LAP2B	78.3	34.1	1.196	0.03731	0.1365	FALSE	#N/A
Myo5a	4.6	18.1	-1.954	0.03737	0.1365	FALSE	8.1198
Mlxipl	0.4	3.1	-2.72	0.03738	0.1365	FALSE	7.1083
Bcas3	0	1.2	-3.385	0.03783	0.1369	FALSE	9.3773
Fam122a	0	1.2	-3.385	0.03783	0.1369	FALSE	#N/A
Mcm6	0	1.2	-3.385	0.03783	0.1369	FALSE	10.37
Ralgapa1	0	1.2	-3.385	0.03783	0.1369	FALSE	#N/A
Vasp	0	1.2	-3.385	0.03783	0.1369	FALSE	7.1278
Vti1b	0	1.2	-3.385	0.03783	0.1369	FALSE	10.8573
Prkar2a	1.4	5.9	-1.948	0.03833	0.1385	FALSE	6.7912
Rps26	5	1.2	1.932	0.03876	0.139	TRUE	13.3652
Arhgef12	0	1.2	-3.37	0.03883	0.139	FALSE	#N/A
Cat	0	1.2	-3.37	0.03883	0.139	FALSE	7.6868
Eif3j2	0	1.2	-3.37	0.03883	0.139	FALSE	#N/A
Pepd	0	1.2	-3.37	0.03883	0.139	FALSE	8.8575
Steap3	0	1.2	-3.37	0.03883	0.139	FALSE	7.0286
Nasp	8	26.5	-1.714	0.0389	0.139	FALSE	11.4759
Acot1	0.7	3.6	-2.156	0.03935	0.1404	FALSE	11.8239
Hdlbp	185.6	117.9	0.6539	0.0395	0.1407	FALSE	11.9269
Syap1	0.6	3.4	-2.213	0.03967	0.1411	FALSE	8.4504
Znf280c	3.4	0.6	2.25	0.03979	0.1413	TRUE	#N/A
Cdk5rap2	8.4	1.5	2.402	0.04008	0.1421	TRUE	7.8953
Rps12	4.8	1.2	1.877	0.04018	0.1422	TRUE	13.5087
Gatad2a	25.5	9.2	1.464	0.04027	0.1423	FALSE	#N/A
Shq1	2.6	9.3	-1.789	0.04046	0.1426	FALSE	7.4936
Prkar2b	1.4	5.9	-1.945	0.04052	0.1426	FALSE	10.0777
Faf1	2.3	0.3	2.605	0.04061	0.1426	TRUE	11.5857
Gabpa	2.3	0.3	2.605	0.04061	0.1426	TRUE	7.3952
Ptpn11	1.4	7.8	-2.376	0.04064	0.1426	FALSE	12.6204
Tfeb	5.2	0.9	2.398	0.04082	0.143	TRUE	#N/A
Eif4g2	43.8	23.6	0.8918	0.04099	0.1433	FALSE	10.6801
Kif11	2.5	0.3	2.687	0.04141	0.1444	TRUE	8.8262
Pnisr	0.3	2.7	-2.617	0.04143	0.1444	FALSE	#N/A
Nol8	19.2	6.8	1.488	0.04181	0.1454	FALSE	9.6489
Huwe1	4	0.8	2.1	0.04183	0.1454	TRUE	8.1157
Ylpm1	7.2	19.4	-1.409	0.04216	0.1462	FALSE	8.7713
Prpf18	2.3	0.3	2.586	0.04225	0.1462	TRUE	10.6816
Zcchc2	2.3	0.3	2.586	0.04225	0.1462	TRUE	6.6431
Cdv3	10.8	22.3	-1.029	0.04301	0.1486	FALSE	12.0267
Flnc	19.5	47.3	-1.274	0.04332	0.1495	FALSE	9.5525
Uaca	0.6	3.4	-2.207	0.04342	0.1496	FALSE	9.8715
Lmnb1	9.5	3	1.61	0.04366	0.1502	TRUE	12.8969
Supt16h	4.1	0.9	2.06	0.04449	0.1528	TRUE	10.0933
Gspt1	1	4.9	-2.209	0.04492	0.154	FALSE	13.3124
Ltv1	21.6	6.6	1.698	0.04503	0.1542	TRUE	9.3237
Epb41l2	32.5	57.5	-0.8221	0.04514	0.1543	FALSE	#N/A
Ttll12	0.6	3.3	-2.174	0.04577	0.1552	FALSE	#N/A
Rrp12	6.4	1.2	2.331	0.04597	0.1552	TRUE	10.6433
Gli3	5.2	0.8	2.474	0.04637	0.1552	TRUE	11.6097
Mga	9.8	1.8	2.382	0.04649	0.1552	TRUE	7.1961
Casp8ap2	1.1	0	3.261	0.04652	0.1552	FALSE	6.6764
CS047	1.1	0	3.261	0.04652	0.1552	FALSE	#N/A
Dek	1.1	0	3.261	0.04652	0.1552	FALSE	10.0594
Las1l	1.1	0	3.261	0.04652	0.1552	FALSE	7.1971
Lsm14a	1.1	0	3.261	0.04652	0.1552	FALSE	10.744
Mum1	1.1	0	3.261	0.04652	0.1552	FALSE	12.6217
Nepro	1.1	0	3.261	0.04652	0.1552	FALSE	#N/A
Rbm28	1.1	0	3.261	0.04652	0.1552	FALSE	11.2393
Rreb1	1.1	0	3.261	0.04652	0.1552	FALSE	8.3318
Runx1	1.1	0	3.261	0.04652	0.1552	FALSE	6.7642
Sprr1b	1.1	0	3.261	0.04652	0.1552	FALSE	6.8681
Zfa	1.1	0	3.261	0.04652	0.1552	FALSE	6.641
Rnh1	5.8	1.8	1.629	0.04658	0.1552	TRUE	#N/A
Elf2	19.6	8.9	1.13	0.04661	0.1552	FALSE	7.6099
Prdx4	2.8	7.9	-1.468	0.04674	0.1554	FALSE	12.839
Rab11fip5	18.3	46	-1.327	0.04712	0.1565	FALSE	7.4938
Fip1l1	37.7	20.3	0.8926	0.04821	0.1598	FALSE	8.1615
Ppp4r3a	1.4	7.3	-2.27	0.04832	0.16	FALSE	#N/A
Tnrc18	3.5	0.6	2.319	0.04862	0.1601	TRUE	6.8628
Idh1	0.7	3.5	-2.138	0.04867	0.1601	FALSE	7.5354
Zcchc11	0.4	2.5	-2.386	0.04906	0.1601	FALSE	6.7102
Fam193b	1	0	3.222	0.04953	0.1601	FALSE	#N/A
Grcc10	1	0	3.222	0.04953	0.1601	FALSE	11.4358
Helz	1	0	3.222	0.04953	0.1601	FALSE	8.9379
Hnrnpc	1	0	3.222	0.04953	0.1601	FALSE	13.5395
Mafk	1	0	3.222	0.04953	0.1601	FALSE	6.7271
Med12	1	0	3.222	0.04953	0.1601	FALSE	8.3717
Mybl2	1	0	3.222	0.04953	0.1601	FALSE	11.3639
Ndc80	1	0	3.222	0.04953	0.1601	FALSE	9.0398
Ppp1cc	1	0	3.222	0.04953	0.1601	FALSE	7.5272
Slbp	1	0	3.222	0.04953	0.1601	FALSE	6.6228
Stag1	1	0	3.222	0.04953	0.1601	FALSE	7.9926
Sun1	1	0	3.222	0.04953	0.1601	FALSE	#N/A
Vprbp	1	0	3.222	0.04953	0.1601	FALSE	6.8897
Znf507	1	0	3.222	0.04953	0.1601	FALSE	#N/A
Elp4	5.5	13.7	-1.305	0.04996	0.1612	FALSE	6.6962
Rpl18a	3.3	0.6	2.217	0.05043	0.1625	FALSE	12.3813
Taf3	3.5	0.6	2.306	0.05057	0.1627	FALSE	7.3805
CASP	12.2	2.9	2.006	0.05061	0.1627	FALSE	#N/A
Dnajb1	22.4	8.6	1.366	0.05086	0.1632	FALSE	12.288
Dpysl2	12.4	35.5	-1.506	0.05159	0.1653	FALSE	12.3011
Smap	0.7	3.4	-2.068	0.05237	0.1676	FALSE	#N/A
Capg	8.4	19.1	-1.174	0.05252	0.1678	FALSE	7.1566
Camsap1	6.2	15.9	-1.328	0.05281	0.1685	FALSE	7.0783
Nfib	5.8	1.8	1.597	0.05323	0.1694	FALSE	7.1405
Arhgdib	1	4.9	-2.155	0.05339	0.1694	FALSE	7.0504
Plin3	9.4	24.1	-1.344	0.05357	0.1694	FALSE	#N/A
Hs1bp3	3.6	10	-1.426	0.05365	0.1694	FALSE	6.9145
Eif2s3x	1	0	3.172	0.05365	0.1694	FALSE	9.6477
Mlkl	1	0	3.172	0.05365	0.1694	FALSE	6.7024
Yars	1	0	3.172	0.05365	0.1694	FALSE	6.9047
Ranbp1	1.4	5.1	-1.759	0.05367	0.1694	FALSE	13.2638
Lasp1	3	8.2	-1.395	0.05457	0.172	FALSE	12.5003
Zfp292	4.5	0.9	2.203	0.0549	0.1728	FALSE	11.0617
Trip12	6.7	1.8	1.841	0.05579	0.1754	FALSE	9.7838
Ebf2	1	0	3.13	0.05721	0.1781	FALSE	8.522
Impa1	1	0	3.13	0.05721	0.1781	FALSE	7.1327
Mat2a	1	0	3.13	0.05721	0.1781	FALSE	13.4574
Mlxip	1	0	3.13	0.05721	0.1781	FALSE	6.7879
Msto1	1	0	3.13	0.05721	0.1781	FALSE	8.291
P4ha1	1	0	3.13	0.05721	0.1781	FALSE	8.2544
Trim41	1	0	3.13	0.05721	0.1781	FALSE	8.482
Myh10	11.4	29.4	-1.355	0.05744	0.1786	FALSE	9.1053
Dgcr14	9.5	3.3	1.501	0.05772	0.1792	FALSE	8.7122
Cap1	0.7	4.6	-2.461	0.0581	0.1802	FALSE	10.781
Stip1	15.1	5.1	1.547	0.05851	0.1812	FALSE	11.5336
Dnttip2	17.5	5.7	1.596	0.05875	0.1817	FALSE	6.7351
Hnrnph1	16.3	7.9	1.029	0.05882	0.1817	FALSE	9.8806
Pym1	0.3	2.4	-2.441	0.05896	0.1818	FALSE	#N/A
Actn4	3	8.1	-1.39	0.05905	0.1818	FALSE	8.1675
Nudc	4.3	11.2	-1.355	0.05909	0.1818	FALSE	13.5129
Arhgap18	0	0.9	-3.1	0.05986	0.1834	FALSE	7.1218
Pip4k2b	0	0.9	-3.1	0.05986	0.1834	FALSE	10.9346
Sik3	0	0.9	-3.1	0.05986	0.1834	FALSE	#N/A
Nop58	7.7	2.7	1.456	0.0607	0.1857	FALSE	#N/A
Myl6	20.2	6.3	1.671	0.06076	0.1857	FALSE	12.8939
Bag3	132.7	81.7	0.6991	0.06098	0.1861	FALSE	11.3798
Gga1	0	0.9	-3.082	0.06157	0.1871	FALSE	8.1353
Myo18a	0	0.9	-3.082	0.06157	0.1871	FALSE	8.0512
Smco1	0	0.9	-3.082	0.06157	0.1871	FALSE	#N/A
Sumo2	2.1	0.3	2.467	0.06232	0.1892	FALSE	10.7936
Rps11	2	0.3	2.398	0.0627	0.19	FALSE	13.7461
Phldb1	14.7	35.5	-1.271	0.06291	0.19	FALSE	9.2036
Eif2b5	2.1	0.3	2.487	0.06293	0.19	FALSE	11.121
Larp4b	2.1	0.3	2.487	0.06293	0.19	FALSE	#N/A
Usp15	19.3	38.7	-1.002	0.06301	0.19	FALSE	7.4868
Ranbp2	54.9	128.1	-1.221	0.06319	0.1903	FALSE	6.7914
Stk3	0.6	3	-2.044	0.0637	0.1916	FALSE	6.877
Sf3b1	18.9	47.2	-1.313	0.06403	0.1923	FALSE	7.0487
Rbms2	8.5	1.8	2.142	0.06436	0.1931	FALSE	10.9467
Gtf2f1	5.3	1.5	1.777	0.06508	0.1942	FALSE	10.3391
Ampd2	0	0.9	-3.037	0.06583	0.1942	FALSE	9.2749
Ano6	0	0.9	-3.037	0.06583	0.1942	FALSE	6.8604
Atrip	0	0.9	-3.037	0.06583	0.1942	FALSE	#N/A
Chtf18	0	0.9	-3.037	0.06583	0.1942	FALSE	12.1958
K0930	0	0.9	-3.037	0.06583	0.1942	FALSE	#N/A
Lztfl1	0	0.9	-3.037	0.06583	0.1942	FALSE	6.7274
Mea1	0	0.9	-3.037	0.06583	0.1942	FALSE	8.1675
Msra	0	0.9	-3.037	0.06583	0.1942	FALSE	6.7725
Mthfd1	0	0.9	-3.037	0.06583	0.1942	FALSE	10.5422
Ostf1	0	0.9	-3.037	0.06583	0.1942	FALSE	7.799
Prosc	0	0.9	-3.037	0.06583	0.1942	FALSE	6.9933
Raf1	0	0.9	-3.037	0.06583	0.1942	FALSE	9.7267
Ppm1g	16.3	8	1.018	0.06676	0.1961	FALSE	8.6568
Pcmt1	0.4	2.4	-2.344	0.06693	0.1961	FALSE	9.6752
Ankrd28	0	0.9	-3.017	0.06774	0.1961	FALSE	9.3867
Cbl	0	0.9	-3.017	0.06774	0.1961	FALSE	6.7349
Cdc37l1	0	0.9	-3.017	0.06774	0.1961	FALSE	9.4291
Cisd1	0	0.9	-3.017	0.06774	0.1961	FALSE	9.4348
Comt	0	0.9	-3.017	0.06774	0.1961	FALSE	9.1541
Fam114a2	0	0.9	-3.017	0.06774	0.1961	FALSE	9.7354
Farsb	0	0.9	-3.017	0.06774	0.1961	FALSE	12.8309
Gcc2	0	0.9	-3.017	0.06774	0.1961	FALSE	8.4526
Lrrfip2	0	0.9	-3.017	0.06774	0.1961	FALSE	7.2629
Ptk2	0	0.9	-3.017	0.06774	0.1961	FALSE	10.7433
Tmem57	0	0.9	-3.017	0.06774	0.1961	FALSE	9.8219
Usp16	0	0.9	-3.017	0.06774	0.1961	FALSE	7.3128
Zfand5	0	0.9	-3.017	0.06774	0.1961	FALSE	#N/A
Elavl1	2.9	0.6	2.067	0.06826	0.1971	FALSE	10.946
Glyr1	2.9	0.6	2.067	0.06826	0.1971	FALSE	#N/A
Ripk1	2.3	7	-1.577	0.06849	0.1975	FALSE	7.6334
Actn1	2.7	7	-1.349	0.06859	0.1975	FALSE	12.0834
Arcn1	3.6	9.3	-1.326	0.06886	0.198	FALSE	6.8157
Noc3l	4.2	0.6	2.525	0.06901	0.198	FALSE	7.8304
H2afy2	3.7	0.9	1.902	0.06903	0.198	FALSE	6.9028
Smap1	1.4	6.3	-2.055	0.06933	0.1987	FALSE	#N/A
Pak2	7	20.7	-1.551	0.06958	0.1991	FALSE	7.053
Ktn1	18.3	39.5	-1.107	0.06982	0.1996	FALSE	7.0437
Dkc1	2	0.3	2.263	0.07057	0.2015	FALSE	6.7345
Prpf31	6.6	2	1.651	0.07115	0.2029	FALSE	7.1154
Taldo1	0.4	2.2	-2.211	0.07156	0.2038	FALSE	12.1025
Wdr18	4.2	0.9	2.041	0.07218	0.2053	FALSE	9.0686
Ankrd17	101	58.3	0.7919	0.07243	0.2058	FALSE	7.3945
Rbm5	4.9	1.5	1.611	0.07393	0.2098	FALSE	11.7601
Chmp5	1.4	4.6	-1.608	0.07437	0.2107	FALSE	6.881
Hspd1	5.2	14.7	-1.489	0.07451	0.2109	FALSE	12.9466
Ugdh	4.1	9.4	-1.171	0.07571	0.214	FALSE	6.7823
Mccc1	131.6	55	1.255	0.07614	0.215	FALSE	7.0226
Pfn1	4.8	1.5	1.602	0.07634	0.2153	FALSE	10.4721
Cnn2	20.3	38.7	-0.9234	0.07647	0.2154	FALSE	8.0687
Strap	0.7	3.2	-1.963	0.07661	0.2155	FALSE	10.7134
Fam107b	0.7	3.7	-2.145	0.07778	0.2185	FALSE	#N/A
Chd8	32.3	11.7	1.458	0.07812	0.219	FALSE	10.5498
Fermt2	0.6	3.7	-2.321	0.07815	0.219	FALSE	11.7527
Znf687	4.8	1.5	1.562	0.08002	0.2239	FALSE	#N/A
Prdx6	3.3	10	-1.567	0.08008	0.2239	FALSE	7.61
Phc3	7	2.5	1.421	0.08074	0.2255	FALSE	6.7781
Cebpz	6.7	1.5	2.055	0.08209	0.2289	FALSE	6.8085
Xdh	5.4	12.5	-1.195	0.0835	0.2326	FALSE	6.8119
Usp14	2.9	8.8	-1.56	0.08374	0.233	FALSE	7.7565
Ncor2	59.9	17.3	1.782	0.08411	0.2337	FALSE	#N/A
Rpl11	5.8	2.2	1.382	0.08442	0.2343	FALSE	#N/A
Commd10	0.6	2.7	-1.916	0.08476	0.235	FALSE	7.4946
Eif3a	4.6	16.8	-1.848	0.08553	0.2368	FALSE	8.2824
Erc1	13.3	25.5	-0.9342	0.08615	0.2383	FALSE	6.8323
Plaa	0.7	3.6	-2.113	0.08626	0.2383	FALSE	9.5762
Kdm4c	2.8	0.6	2.009	0.08713	0.2404	FALSE	#N/A
Snx4	2.7	6.7	-1.278	0.08802	0.2426	FALSE	9.5244
Lrrc47	5.2	1.7	1.502	0.0882	0.2428	FALSE	#N/A
Gse1	3.9	0.8	2.046	0.08899	0.2447	FALSE	7.8504
Pdap1	11.1	23.4	-1.069	0.08952	0.2458	FALSE	12.7772
Zeb2	17.3	7.4	1.212	0.09007	0.2469	FALSE	9.5602
Arhgap22	1	3.6	-1.689	0.09012	0.2469	FALSE	7.014
Pcm1	78.3	29.4	1.409	0.09041	0.2471	FALSE	6.9173
Nup50	7.7	15.5	-1.005	0.09042	0.2471	FALSE	7.6802
Phldb2	1.8	5.5	-1.536	0.09054	0.2471	FALSE	6.6928
Bcor	2.8	0.6	1.993	0.09131	0.2489	FALSE	7.5962
Khdrbs1	4.6	1.3	1.763	0.09167	0.2496	FALSE	9.0347
Nono	41.5	22.1	0.9078	0.09307	0.2531	FALSE	7.3539
Msrb3	0.7	3.1	-1.949	0.09347	0.2539	FALSE	6.7448
Eif4h	6.6	15.9	-1.253	0.09432	0.2541	FALSE	13.2173
Snx6	1	3.5	-1.739	0.09512	0.2541	FALSE	8.8236
Psmc3	5.9	1.4	1.941	0.09525	0.2541	FALSE	11.9415
Slain2	3.6	10.1	-1.469	0.09547	0.2541	FALSE	8.7187
Kank2	34.7	69.3	-0.9937	0.09554	0.2541	FALSE	#N/A
Arhgdia	3.1	8.5	-1.445	0.09721	0.2541	FALSE	#N/A
Mex3d	1.7	0.3	2.176	0.09729	0.2541	FALSE	#N/A
Prkcdbp	1.7	0.3	2.176	0.09729	0.2541	FALSE	7.5463
Taok3	0.7	3.1	-1.953	0.09735	0.2541	FALSE	6.7803
Stk10	2.1	6.4	-1.534	0.09765	0.2541	FALSE	6.9049
Ddx46	15.1	35.6	-1.236	0.09766	0.2541	FALSE	8.4401
Palm2	1.1	4.2	-1.852	0.09783	0.2541	FALSE	6.7124
Eef1d	9	18.3	-1.013	0.098	0.2541	FALSE	13.4243
Pfdn2	0.4	2.1	-2.143	0.09914	0.2541	FALSE	13.5652
Smg9	0.4	2.1	-2.143	0.09914	0.2541	FALSE	#N/A
Znf516	23.6	13.4	0.8042	0.09939	0.2541	FALSE	#N/A
Polr2a	0.3	1.8	-2.086	0.09946	0.2541	FALSE	8.3591
Gpatch8	4.6	1.2	1.819	0.09972	0.2541	FALSE	#N/A
Ak1	0.7	0	2.731	0.1001	0.2541	FALSE	7.1541
Arhgap24	0.7	0	2.731	0.1001	0.2541	FALSE	7.6722
Asxl2	0.7	0	2.731	0.1001	0.2541	FALSE	6.9847
Bach1	0.7	0	2.731	0.1001	0.2541	FALSE	9.3133
Cbfb	0.7	0	2.731	0.1001	0.2541	FALSE	11.6253
Cbx4	0.7	0	2.731	0.1001	0.2541	FALSE	6.7052
Cbx6	0.7	0	2.731	0.1001	0.2541	FALSE	9.4419
Ccdc59	0.7	0	2.731	0.1001	0.2541	FALSE	9.8139
CD027	0.7	0	2.731	0.1001	0.2541	FALSE	#N/A
Dcaf5	0.7	0	2.731	0.1001	0.2541	FALSE	#N/A
Dcun1d5	0.7	0	2.731	0.1001	0.2541	FALSE	9.8976
Dnmt3a	0.7	0	2.731	0.1001	0.2541	FALSE	6.7154
E4f1	0.7	0	2.731	0.1001	0.2541	FALSE	8.8056
Fam207a	0.7	0	2.731	0.1001	0.2541	FALSE	#N/A
Gtf3c1	0.7	0	2.731	0.1001	0.2541	FALSE	9.323
Iqsec1	0.7	0	2.731	0.1001	0.2541	FALSE	6.6635
Kansl1	0.7	0	2.731	0.1001	0.2541	FALSE	#N/A
Kmt2c	0.7	0	2.731	0.1001	0.2541	FALSE	#N/A
Mrfap1	0.7	0	2.731	0.1001	0.2541	FALSE	6.7341
Nccrp1	0.7	0	2.731	0.1001	0.2541	FALSE	#N/A
Nedd8	0.7	0	2.731	0.1001	0.2541	FALSE	12.8288
Nkx2-5	0.7	0	2.731	0.1001	0.2541	FALSE	6.8569
Nlrp1b	0.7	0	2.731	0.1001	0.2541	FALSE	#N/A
Nol9	0.7	0	2.731	0.1001	0.2541	FALSE	7.6527
Phf21a	0.7	0	2.731	0.1001	0.2541	FALSE	7.0157
Pias4	0.7	0	2.731	0.1001	0.2541	FALSE	8.2852
Prepl	0.7	0	2.731	0.1001	0.2541	FALSE	6.8068
Proser3	0.7	0	2.731	0.1001	0.2541	FALSE	#N/A
Ptpn2	0.7	0	2.731	0.1001	0.2541	FALSE	7.6051
Rbl1	0.7	0	2.731	0.1001	0.2541	FALSE	7.4888
Rpl30	0.7	0	2.731	0.1001	0.2541	FALSE	12.7036
Rps6ka4	0.7	0	2.731	0.1001	0.2541	FALSE	6.8647
Spc24	0.7	0	2.731	0.1001	0.2541	FALSE	9.8224
Tfcp2	0.7	0	2.731	0.1001	0.2541	FALSE	#N/A
Trim33	0.7	0	2.731	0.1001	0.2541	FALSE	8.8458
Tshz1	0.7	0	2.731	0.1001	0.2541	FALSE	9.4568
Ubr2	0.7	0	2.731	0.1001	0.2541	FALSE	7.4925
Zcchc9	0.7	0	2.731	0.1001	0.2541	FALSE	7.1155
Znf518b	0.7	0	2.731	0.1001	0.2541	FALSE	#N/A
Znf574	0.7	0	2.731	0.1001	0.2541	FALSE	#N/A
Whsc1	10.4	3.3	1.619	0.1003	0.2541	FALSE	11.0112
Rbms1	1.7	0.3	2.208	0.1003	0.2541	FALSE	8.4259
Tada3	1.7	0.3	2.208	0.1003	0.2541	FALSE	#N/A
Snrnp200	0.7	3.3	-1.977	0.1009	0.2553	FALSE	#N/A
Prkra	1.7	0.3	2.151	0.1017	0.2569	FALSE	10.547
Psmc1	1.7	0.3	2.151	0.1017	0.2569	FALSE	10.5124
Plin4	0.7	3	-1.963	0.1027	0.2592	FALSE	#N/A
Nedd4l	2.1	5.7	-1.405	0.1055	0.266	FALSE	8.3312
Nxf1	3.9	1.2	1.588	0.1059	0.2665	FALSE	9.0542
Top1	29.2	10.3	1.492	0.106	0.2666	FALSE	7.3535
Isy1	0.7	2.9	-1.885	0.1064	0.2672	FALSE	11.3906
Nup214	24.3	45.4	-0.8995	0.1075	0.2697	FALSE	9.4334
Thrap3	14.3	37.1	-1.365	0.1076	0.2698	FALSE	6.8321
Cebpb	4.5	1.2	1.841	0.108	0.2704	FALSE	7.373
Pak1	0.6	2.6	-1.861	0.109	0.2726	FALSE	6.7972
Qki	6.5	2.7	1.251	0.1095	0.2736	FALSE	#N/A
Parg	0.3	1.9	-2.109	0.1105	0.2758	FALSE	6.9452
Matr3	12.9	5	1.332	0.1109	0.2764	FALSE	11.9823
Tcf25	1.7	0.3	2.183	0.1114	0.2774	FALSE	11.4754
Gpatch4	7.3	3	1.228	0.1116	0.2774	FALSE	8.7066
Nsrp1	1.4	4.2	-1.523	0.1116	0.2774	FALSE	#N/A
Hells	2.4	0.6	1.775	0.1126	0.2794	FALSE	6.7155
Caprin1	1.1	4	-1.772	0.113	0.28	FALSE	10.3937
Ppp1r12c	0.3	1.8	-2.075	0.113	0.28	FALSE	7.6717
Flii	0.7	2.7	-1.73	0.1134	0.2805	FALSE	8.5497
Fbxo30	2	5.1	-1.277	0.1146	0.2832	FALSE	8.6126
CK098	2.5	0.6	1.928	0.1151	0.2839	FALSE	#N/A
Peak1	26.6	67.7	-1.343	0.1151	0.2839	FALSE	#N/A
Slc25a3	3	0.9	1.613	0.1154	0.2843	FALSE	9.8764
Ank3	3.1	8.2	-1.365	0.1162	0.2859	FALSE	8.3875
Pdcl	2.5	7	-1.461	0.1168	0.287	FALSE	7.6428
Gata4	1.7	0.3	2.02	0.1169	0.287	FALSE	6.9948
Rnps1	2.5	0.6	1.911	0.1175	0.2881	FALSE	11.5614
Trps1	17.9	6.3	1.482	0.1178	0.2887	FALSE	8.8091
Gmps	4.2	15	-1.822	0.118	0.2889	FALSE	7.8678
Nap1l1	17	7.5	1.173	0.1189	0.2891	FALSE	11.577
Lats1	1	3.4	-1.577	0.1191	0.2891	FALSE	6.9122
Nsf	2.4	6.7	-1.454	0.1191	0.2891	FALSE	9.3988
Sp2	2.7	0.6	1.961	0.1198	0.2891	FALSE	6.8465
Npat	2.5	0.6	1.834	0.1209	0.2891	FALSE	6.7589
Tdrd3	9.3	3.5	1.366	0.1211	0.2891	FALSE	9.3961
Arhgap5	0.3	1.8	-2.041	0.1215	0.2891	FALSE	6.7231
Spag7	4.5	9.4	-1.062	0.1223	0.2891	FALSE	10.9864
Rpl4	22.8	8.2	1.462	0.1228	0.2891	FALSE	11.0272
Gen1	4.4	1.5	1.493	0.123	0.2891	FALSE	#N/A
Nab1	3	0.9	1.618	0.123	0.2891	FALSE	7.3985
Agfg1	2.4	5.7	-1.212	0.124	0.2891	FALSE	9.5195
Fnbp4	0.7	2.7	-1.771	0.1241	0.2891	FALSE	7.0251
Tpx2	39.4	22.2	0.8244	0.1244	0.2891	FALSE	8.6404
Atp2b1	0	0.6	-2.549	0.1251	0.2891	FALSE	7.1844
Cacul1	0	0.6	-2.549	0.1251	0.2891	FALSE	#N/A
Casc5	0	0.6	-2.549	0.1251	0.2891	FALSE	6.7768
Cep250	0	0.6	-2.549	0.1251	0.2891	FALSE	6.8249
Coprs	0	0.6	-2.549	0.1251	0.2891	FALSE	#N/A
Dgkz	0	0.6	-2.549	0.1251	0.2891	FALSE	9.002
Dhx8	0	0.6	-2.549	0.1251	0.2891	FALSE	7.7129
Dusp12	0	0.6	-2.549	0.1251	0.2891	FALSE	6.6862
Edc3	0	0.6	-2.549	0.1251	0.2891	FALSE	#N/A
Eif4ebp2	0	0.6	-2.549	0.1251	0.2891	FALSE	8.9495
Fcho2	0	0.6	-2.549	0.1251	0.2891	FALSE	9.6468
Fem1c	0	0.6	-2.549	0.1251	0.2891	FALSE	7.9339
Frs2	0	0.6	-2.549	0.1251	0.2891	FALSE	7.6657
Gmds	0	0.6	-2.549	0.1251	0.2891	FALSE	9.4
Ifrd1	0	0.6	-2.549	0.1251	0.2891	FALSE	6.7474
Lrba	0	0.6	-2.549	0.1251	0.2891	FALSE	9.0746
Lrp1	0	0.6	-2.549	0.1251	0.2891	FALSE	7.3599
Map2k3	0	0.6	-2.549	0.1251	0.2891	FALSE	9.7197
Marcksl1	0	0.6	-2.549	0.1251	0.2891	FALSE	11.6102
Mdm4	0	0.6	-2.549	0.1251	0.2891	FALSE	7.0278
Mib1	0	0.6	-2.549	0.1251	0.2891	FALSE	7.901
Mpdz	0	0.6	-2.549	0.1251	0.2891	FALSE	7.2759
Nfkb1	0	0.6	-2.549	0.1251	0.2891	FALSE	7.8362
Ocrl	0	0.6	-2.549	0.1251	0.2891	FALSE	8.2714
Rab3gap2	0	0.6	-2.549	0.1251	0.2891	FALSE	8.5992
Rabgap1l	0	0.6	-2.549	0.1251	0.2891	FALSE	6.9328
Rheb	0	0.6	-2.549	0.1251	0.2891	FALSE	11.0132
Rmdn2	0	0.6	-2.549	0.1251	0.2891	FALSE	#N/A
Rnf135	0	0.6	-2.549	0.1251	0.2891	FALSE	8.457
Rplp2	0	0.6	-2.549	0.1251	0.2891	FALSE	13.2452
Scoc	0	0.6	-2.549	0.1251	0.2891	FALSE	8.5606
Scyl2	0	0.6	-2.549	0.1251	0.2891	FALSE	6.7291
Slc7a6os	0	0.6	-2.549	0.1251	0.2891	FALSE	7.3768
Snrpd2	0	0.6	-2.549	0.1251	0.2891	FALSE	13.446
Tmem199	0	0.6	-2.549	0.1251	0.2891	FALSE	10.3136
Uba2	0	0.6	-2.549	0.1251	0.2891	FALSE	10.7134
Uba3	0	0.6	-2.549	0.1251	0.2891	FALSE	#N/A
Vbp1	0	0.6	-2.549	0.1251	0.2891	FALSE	7.7775
Vimp	0	0.6	-2.549	0.1251	0.2891	FALSE	#N/A
Vps8	0	0.6	-2.549	0.1251	0.2891	FALSE	7.9298
Zc2hc1a	0	0.6	-2.549	0.1251	0.2891	FALSE	#N/A
Zfand3	0	0.6	-2.549	0.1251	0.2891	FALSE	11.3994
Grb10	7.4	15.3	-1.04	0.1281	0.2956	FALSE	13.1535
Abi1	1.7	5.1	-1.547	0.1283	0.2958	FALSE	9.4488
Tceb3	8.2	3.9	1.06	0.1304	0.3003	FALSE	7.7455
Gapvd1	1	3.6	-1.673	0.1311	0.3018	FALSE	10.1614
Hars	0.7	2.4	-1.685	0.1313	0.3018	FALSE	7.2285
Bmp2k	6.1	2.7	1.152	0.132	0.303	FALSE	6.8592
Cherp	6.3	15.3	-1.269	0.1321	0.303	FALSE	10.8286
Tnip1	1.7	4.6	-1.322	0.1335	0.306	FALSE	7.8535
Picalm	3.3	7.3	-1.113	0.1353	0.3098	FALSE	7.0736
Pikfyve	0.4	1.8	-1.944	0.136	0.3111	FALSE	#N/A
Npm1	80.1	35.5	1.171	0.1369	0.3129	FALSE	13.3695
Taf1	5.9	1.8	1.642	0.1382	0.3154	FALSE	6.9003
Ehmt1	14.9	5.4	1.443	0.1389	0.3167	FALSE	6.9159
Tagln2	26.7	57.2	-1.094	0.1399	0.3188	FALSE	9.3432
Irf2bp1	3	0.9	1.534	0.1404	0.3194	FALSE	10.2906
Fam193a	4.9	1.5	1.626	0.1407	0.3199	FALSE	#N/A
Smarca4	11.1	3.8	1.529	0.1409	0.32	FALSE	9.5938
Gpatch1	6.4	2.7	1.21	0.1414	0.321	FALSE	7.3336
Srpr	0.6	2.5	-1.775	0.1419	0.3215	FALSE	8.1721
Gnl3	72.7	45.7	0.6682	0.1419	0.3215	FALSE	12.846
Nemf	4.5	1.8	1.225	0.1453	0.3287	FALSE	#N/A
Puf60	4.5	11.5	-1.345	0.1479	0.3341	FALSE	13.4424
Anks1a	1.4	4.3	-1.517	0.1479	0.3341	FALSE	#N/A
Taf7	7.5	3.6	1.024	0.1483	0.3345	FALSE	7.9631
Tagln	4.9	14.4	-1.534	0.1486	0.335	FALSE	6.8547
Atxn2l	29.8	57.5	-0.9427	0.1492	0.336	FALSE	7.2588
Snx3	3.9	1.2	1.598	0.1495	0.3362	FALSE	6.9635
Tubb6	30.4	13.9	1.128	0.1513	0.34	FALSE	9.2325
Tmod3	2	4.9	-1.202	0.1515	0.3401	FALSE	8.3682
Serbp1	12.7	35	-1.458	0.1532	0.3434	FALSE	13.1873
Clasp2	0.4	1.7	-1.908	0.1534	0.3434	FALSE	6.7639
Rabep1	0.4	1.7	-1.908	0.1534	0.3434	FALSE	7.7742
Kif4	31.7	17.3	0.8713	0.1545	0.3455	FALSE	9.3373
Larp7	4.9	1.5	1.62	0.1552	0.3466	FALSE	7.021
Psmc2	4.5	9.3	-1.023	0.1559	0.3479	FALSE	13.2624
Txnl1	1.9	6.5	-1.712	0.156	0.3479	FALSE	6.703
Zcchc8	2.7	0.8	1.536	0.1563	0.3479	FALSE	11.7421
Ccs	1.1	3.4	-1.544	0.1563	0.3479	FALSE	11.4763
Krt17	27.2	16.6	0.712	0.1585	0.3522	FALSE	6.7536
Rsrc2	0.7	2.5	-1.646	0.1586	0.3522	FALSE	9.6047
Atrx	17	4.8	1.794	0.159	0.3527	FALSE	6.8185
Cks1b	1.4	0.3	1.922	0.1599	0.3539	FALSE	6.8264
Dstn	1.4	0.3	1.922	0.1599	0.3539	FALSE	10.52
Sf3a3	1.4	0.3	1.922	0.1599	0.3539	FALSE	12.566
Raver1	2.7	0.9	1.47	0.1603	0.3544	FALSE	8.7778
Ccar1	0.7	2.4	-1.62	0.1609	0.3554	FALSE	10.7617
Elp2	0.3	1.5	-1.822	0.1621	0.3576	FALSE	11.6066
Ddx21	20.9	12	0.7888	0.1628	0.3585	FALSE	11.0012
Tprn	0.7	2.5	-1.726	0.1628	0.3585	FALSE	#N/A
Nob1	3.7	1.5	1.288	0.1631	0.3589	FALSE	10.1353
Zcchc14	2.1	0.6	1.729	0.1639	0.3603	FALSE	8.0092
Smarca5	21	11.2	0.8971	0.1642	0.3605	FALSE	7.1011
Tfip11	4.5	9.2	-1.002	0.1659	0.3638	FALSE	9.5696
Ccdc174	3.4	1.3	1.34	0.1662	0.3643	FALSE	#N/A
Rbm17	5.6	11.8	-1.057	0.1666	0.3646	FALSE	#N/A
Tanc2	1.4	4.2	-1.495	0.1667	0.3646	FALSE	6.8094
Erh	0.7	2.4	-1.594	0.1694	0.3698	FALSE	13.0227
Ncaph	0.7	2.4	-1.594	0.1694	0.3698	FALSE	10.5149
Gkap1	3.8	1.2	1.551	0.1699	0.3703	FALSE	8.2133
Stmn1	3.2	8.3	-1.342	0.1699	0.3703	FALSE	8.626
Luzp1	42.7	22.1	0.9445	0.1711	0.3725	FALSE	10.4383
Spats2	9.2	4.1	1.146	0.1715	0.373	FALSE	6.6831
Phrf1	2.1	0.6	1.688	0.1723	0.3743	FALSE	10.9135
Nup98	1.8	5.3	-1.517	0.1724	0.3743	FALSE	8.2569
Ctdp1	3.7	7.4	-0.9815	0.1728	0.3747	FALSE	8.172
Dennd4c	3.2	9.8	-1.604	0.1729	0.3747	FALSE	6.8128
Tp53bp1	1.7	5.3	-1.529	0.1734	0.3753	FALSE	#N/A
Pinx1	2.1	0.6	1.635	0.1738	0.3755	FALSE	#N/A
Armcx2	2.1	0.6	1.614	0.1741	0.3755	FALSE	12.8352
Etfa	0.3	1.5	-1.81	0.1743	0.3755	FALSE	10.4453
Mapk8ip3	0.3	1.5	-1.81	0.1743	0.3755	FALSE	6.8311
Ube2m	0.3	1.5	-1.81	0.1743	0.3755	FALSE	9.6551
Scaf1	2.8	0.8	1.609	0.1746	0.3755	FALSE	7.7331
Uvssa	2.8	0.8	1.609	0.1746	0.3755	FALSE	#N/A
Eif5	29.5	62.4	-1.076	0.1771	0.3804	FALSE	13.0011
Ctcf	2.3	0.7	1.625	0.178	0.3821	FALSE	10.1233
Rps23	14.8	8.6	0.7749	0.1783	0.3824	FALSE	6.7881
Dhx15	3.2	7.1	-1.146	0.1787	0.3828	FALSE	11.2354
Scfd1	1.3	0.3	1.852	0.1792	0.3836	FALSE	7.2281
Tpm4	1	2.7	-1.379	0.1798	0.3846	FALSE	11.9441
N4bp1	0.4	1.5	-1.726	0.1806	0.3858	FALSE	#N/A
Mars	2	0.6	1.613	0.181	0.3863	FALSE	8.9002
Coil	2.1	0.6	1.561	0.1814	0.3865	FALSE	8.5915
Rpl23	2.1	0.6	1.561	0.1814	0.3865	FALSE	13.2699
Kmt2b	2.1	0.6	1.593	0.1833	0.3897	FALSE	#N/A
Sec24a	0.4	1.5	-1.754	0.1834	0.3897	FALSE	6.6902
Vwa5a	0.4	1.5	-1.754	0.1834	0.3897	FALSE	7.0537
Mre11a	13.2	26.8	-1.008	0.1838	0.3901	FALSE	10.4599
Fam21	9.5	25.3	-1.403	0.1843	0.3909	FALSE	#N/A
Upf1	6.2	3	1.003	0.1864	0.3949	FALSE	8.367
Epb41l3	77.4	111.3	-0.5224	0.1883	0.3987	FALSE	#N/A
Stau2	8	3.2	1.278	0.1891	0.3998	FALSE	8.4963
Ncapd2	0.7	2.1	-1.488	0.1909	0.4027	FALSE	10.2611
Tbc1d5	3.8	7.5	-0.9694	0.1909	0.4027	FALSE	8.6291
Znf609	5.5	1.6	1.689	0.1913	0.4027	FALSE	#N/A
Sh3pxd2b	2.5	5.4	-1.111	0.1913	0.4027	FALSE	10.0409
Cdk12	2.3	5.2	-1.129	0.1913	0.4027	FALSE	#N/A
Hexim1	0.3	1.4	-1.768	0.192	0.4039	FALSE	8.2746
Krt82	2	0.6	1.519	0.1935	0.4063	FALSE	7.02
Ccdc18	0.4	1.5	-1.714	0.1937	0.4063	FALSE	6.9758
Tle3	0.4	1.5	-1.714	0.1937	0.4063	FALSE	7.3019
Six4	3.7	1.5	1.232	0.194	0.4064	FALSE	6.9159
Synj2	3.8	8.3	-1.098	0.1942	0.4064	FALSE	6.8022
Ubap2	23.9	37	-0.6293	0.1943	0.4064	FALSE	12.241
Rtf1	5	1.8	1.423	0.1948	0.407	FALSE	#N/A
Atp6v1h	2	0.6	1.518	0.196	0.4093	FALSE	10.1243
Brd2	7.2	3.3	1.113	0.1976	0.4122	FALSE	13.0473
Usp10	0.7	2.4	-1.539	0.1986	0.4137	FALSE	7.5043
Baz1a	3.8	1.1	1.643	0.1988	0.4137	FALSE	6.7553
Actbl2	15.9	9.1	0.7911	0.1989	0.4137	FALSE	6.7062
Nab2	17.3	8.8	0.9642	0.2	0.4158	FALSE	6.9995
Rpl27	5.4	2.1	1.295	0.2006	0.4166	FALSE	13.4724
Sap30bp	6.5	3	1.091	0.2012	0.4175	FALSE	8.1418
Dvl2	22	11.4	0.937	0.2017	0.418	FALSE	6.8416
Phax	2.7	5.5	-0.9698	0.2019	0.4182	FALSE	8.6781
Rpap3	11.5	21.5	-0.9004	0.2031	0.4202	FALSE	8.3456
Hnrnpl	3.2	7.1	-1.111	0.2032	0.4202	FALSE	#N/A
Pdlim7	5.9	10.9	-0.8645	0.2035	0.4203	FALSE	10.188
Kif1b	4.9	1.7	1.441	0.2048	0.4226	FALSE	9.8217
Tubb1	14.6	6.2	1.205	0.2065	0.4257	FALSE	6.9299
Trip4	7.9	3.6	1.094	0.2069	0.4262	FALSE	6.9018
Ddx27	4.3	1.8	1.203	0.2083	0.4287	FALSE	10.8622
Bclaf1	13.9	28.8	-1.045	0.2098	0.4311	FALSE	11.1378
Cdc73	3.7	1.5	1.191	0.2098	0.4311	FALSE	7.754
Npm3	2	0.6	1.491	0.211	0.433	FALSE	12.5318
CG050	4.3	1.5	1.414	0.2118	0.4344	FALSE	#N/A
Hip1	0.7	2.1	-1.453	0.2133	0.437	FALSE	8.3216
Eif4enif1	32.3	21.1	0.6146	0.2135	0.437	FALSE	9.0029
Hmgcs1	2.4	0.9	1.344	0.2152	0.4401	FALSE	#N/A
Kdm3b	20.5	13	0.6496	0.2153	0.4401	FALSE	#N/A
Rpl22	2.4	0.9	1.306	0.2175	0.444	FALSE	11.2084
Pabpc1	18.3	31.5	-0.7804	0.2199	0.4479	FALSE	10.4042
Pes1	11.3	6.7	0.7534	0.2199	0.4479	FALSE	9.8655
Lsg1	2.8	6.5	-1.183	0.2199	0.4479	FALSE	10.1205
Kif15	1	2.7	-1.263	0.2205	0.4485	FALSE	10.2613
Rpl6	21.6	12.7	0.7615	0.2208	0.4489	FALSE	7.4828
Birc6	3.4	1.5	1.144	0.2211	0.4491	FALSE	6.9691
Plekho2	1.1	3.3	-1.463	0.2214	0.4493	FALSE	7.3406
Kars	1	2.7	-1.27	0.2218	0.4495	FALSE	11.0836
Ssrp1	9.6	4.9	0.9457	0.2219	0.4495	FALSE	12.0257
Bbx	5.6	2.7	1.008	0.2233	0.4519	FALSE	8.3284
Cnn3	18	29.5	-0.7043	0.2241	0.4527	FALSE	#N/A
Hnrnpab	2.5	5.4	-1.108	0.2241	0.4527	FALSE	13.228
Cpsf7	3.5	1.5	1.157	0.2264	0.4571	FALSE	#N/A
Tuba4a	61.7	92.2	-0.5799	0.2272	0.458	FALSE	7.0196
Zcchc6	3.2	1.2	1.308	0.2273	0.458	FALSE	9.1339
Slc25a4	1.6	5.2	-1.61	0.2275	0.458	FALSE	7.8321
Nav3	8.8	3.3	1.395	0.2298	0.4622	FALSE	6.6516
Cstf2	2.7	6.3	-1.161	0.2324	0.4667	FALSE	10.7488
Ppp6r1	1.4	3.6	-1.307	0.2324	0.4667	FALSE	#N/A
Cfdp1	18.6	10.9	0.7593	0.2328	0.4667	FALSE	10.2826
Apbb2	7.7	14.3	-0.8742	0.233	0.4667	FALSE	7.9087
Gas2	1.4	3.6	-1.277	0.2331	0.4667	FALSE	7.1067
Akap8	3.4	1.5	1.131	0.2346	0.4695	FALSE	8.2393
Bzw1	1.8	0.6	1.474	0.2361	0.4708	FALSE	10.1643
Nudcd2	1.8	0.6	1.474	0.2361	0.4708	FALSE	7.6281
Spata5	1.8	0.6	1.474	0.2361	0.4708	FALSE	6.7774
Ep400	15.3	8.9	0.7758	0.2361	0.4708	FALSE	11.2668
Luc7l2	10.7	3.9	1.441	0.2366	0.4713	FALSE	7.7946
Pask	0.7	2.1	-1.392	0.2377	0.4732	FALSE	6.9611
Gak	1.5	3.8	-1.299	0.2408	0.4786	FALSE	11.4998
Arid1a	17	9.9	0.7753	0.2408	0.4786	FALSE	7.1851
Ptbp3	2.3	0.9	1.265	0.2416	0.4797	FALSE	#N/A
Fam135a	3.1	1.2	1.28	0.2418	0.4797	FALSE	8.6903
Zc3h14	7.2	11.7	-0.7014	0.2425	0.4805	FALSE	10.472
Ptrf	23.7	13.6	0.7951	0.2432	0.4805	FALSE	6.6816
FAM120A	10.3	5.7	0.8425	0.2432	0.4805	FALSE	7.4688
Phf20l1	1.7	0.6	1.449	0.2432	0.4805	FALSE	6.9146
Apc	0.3	1.3	-1.585	0.2433	0.4805	FALSE	6.945
Jund	3.5	1.5	1.104	0.2439	0.481	FALSE	#N/A
Peg3	7	2.8	1.311	0.2439	0.481	FALSE	11.1687
Setd2	25.6	8.5	1.577	0.2447	0.4821	FALSE	10.6096
Hnrnph2	8.1	4.6	0.8105	0.2452	0.4823	FALSE	6.6876
Ptms	1	2.7	-1.28	0.2452	0.4823	FALSE	7.0711
Lyar	30.4	17.2	0.817	0.2455	0.4824	FALSE	9.6483
Mysm1	3.8	1.5	1.277	0.2473	0.4853	FALSE	9.2793
Ruvbl2	2.4	0.8	1.37	0.2474	0.4853	FALSE	10.6085
Tox4	36.9	25.8	0.5118	0.2477	0.4855	FALSE	#N/A
Stk38	2.1	5.2	-1.265	0.2488	0.487	FALSE	6.6509
Krt14	37.9	26.2	0.5301	0.2489	0.487	FALSE	6.8807
Tbcb	9.1	15.9	-0.7906	0.2499	0.4886	FALSE	12.6843
Psip1	8.1	4.2	0.915	0.2527	0.4933	FALSE	10.8308
Chd6	2.5	0.9	1.284	0.2528	0.4933	FALSE	8.1727
Rfc1	9.1	5.4	0.7301	0.2537	0.4948	FALSE	11.1529
Sugp1	20.9	13.6	0.6202	0.254	0.4949	FALSE	#N/A
Nudt5	2.7	5.5	-1.005	0.2543	0.4951	FALSE	10.6616
Taf9	5.6	10.5	-0.8943	0.2549	0.4957	FALSE	7.4633
Myof	5.3	11.4	-1.08	0.2551	0.4957	FALSE	#N/A
Dctn2	4.5	2.1	1.044	0.2558	0.4966	FALSE	12.5583
Fam114a1	1.7	3.6	-1.035	0.2567	0.4976	FALSE	#N/A
Actc1	49.7	29.9	0.7324	0.2569	0.4976	FALSE	6.9564
Xrn2	9.2	5.5	0.7189	0.2569	0.4976	FALSE	6.8161
G3bp2	8.6	4.2	1	0.2576	0.4986	FALSE	13.236
Hspa9	2.4	4.9	-0.9575	0.2581	0.4991	FALSE	13.0656
Sf1	26.5	44.2	-0.738	0.2595	0.5014	FALSE	8.2255
Soga1	3.6	1.5	1.215	0.26	0.5015	FALSE	#N/A
Ddx1	0.3	1.2	-1.536	0.2602	0.5015	FALSE	11.0514
Papola	0.3	1.2	-1.536	0.2602	0.5015	FALSE	8.3206
Cic	6.4	10.4	-0.6775	0.2613	0.5019	FALSE	7.8008
Shroom4	13.6	20.6	-0.5917	0.2614	0.5019	FALSE	6.9566
Ahsa2	1.7	0.6	1.355	0.2615	0.5019	FALSE	7.655
Leng8	1.7	0.6	1.355	0.2615	0.5019	FALSE	6.9305
Trim32	1.7	0.6	1.355	0.2615	0.5019	FALSE	10.7241
Cep85	2.7	1.2	1.137	0.2624	0.5031	FALSE	#N/A
Junb	19.3	12	0.6769	0.2626	0.5031	FALSE	7.1877
Paf1	5.6	2.7	0.9904	0.2636	0.5046	FALSE	9.2466
Diaph2	0.7	2	-1.361	0.2641	0.5048	FALSE	#N/A
Eif3d	10	5	0.9694	0.2644	0.5048	FALSE	13.3808
Ppp1r37	2.3	0.9	1.201	0.2646	0.5048	FALSE	#N/A
Lsm12	2.7	1.2	1.087	0.2646	0.5048	FALSE	10.6526
Tsr1	2.8	1.2	1.118	0.265	0.5053	FALSE	7.1049
Stat1	2.5	5.1	-1.015	0.2653	0.5054	FALSE	7.3317
Rpl5	6.3	3.3	0.8914	0.2658	0.5058	FALSE	#N/A
Ik	21.8	15	0.5323	0.2677	0.5081	FALSE	10.3721
Arhgef1	1.1	0.3	1.565	0.2683	0.5081	FALSE	7.9628
Cdt1	1.1	0.3	1.565	0.2683	0.5081	FALSE	11.017
Hook3	1.1	0.3	1.565	0.2683	0.5081	FALSE	8.3567
Pacs1	1.1	0.3	1.565	0.2683	0.5081	FALSE	9.0113
Utp18	1.1	0.3	1.565	0.2683	0.5081	FALSE	6.7686
Rbm26	13.6	20	-0.5577	0.2686	0.5082	FALSE	7.8129
Arhgef17	4.5	8.7	-0.9373	0.2702	0.5108	FALSE	6.9161
Ppia	15.9	6.8	1.205	0.2708	0.5115	FALSE	13.3514
Pfas	0.7	2.1	-1.338	0.271	0.5115	FALSE	10.366
Efhd2	11	22.2	-1.009	0.2713	0.5117	FALSE	6.7466
Tcerg1	9.6	19.8	-1.034	0.2715	0.5117	FALSE	11.2478
Map6	4.9	12.7	-1.346	0.2725	0.5131	FALSE	#N/A
Hnrnpul1	0.7	1.8	-1.239	0.2745	0.5165	FALSE	7.1059
Hddc2	0.6	1.8	-1.346	0.2767	0.5201	FALSE	8.1483
Mta1	6.9	13.1	-0.8991	0.2772	0.5205	FALSE	6.9464
H1f0	61.5	40.5	0.6011	0.2773	0.5205	FALSE	8.2611
Nipbl	2.7	1.2	1.086	0.2777	0.5207	FALSE	10.6315
Pdcd6ip	0.3	1.2	-1.485	0.2785	0.5214	FALSE	6.9501
Smc4	0.3	1.2	-1.485	0.2785	0.5214	FALSE	6.8655
Wipi1	1	2.5	-1.203	0.2795	0.5229	FALSE	7.8503
Ttc4	0.4	1.2	-1.454	0.2805	0.5243	FALSE	8.5194
Bod1l	3.5	8.4	-1.245	0.2812	0.5252	FALSE	#N/A
Canx	1	0.3	1.526	0.282	0.5254	FALSE	6.7247
Tsn	1	0.3	1.526	0.282	0.5254	FALSE	8.027
Zkscan3	1	0.3	1.526	0.282	0.5254	FALSE	7.3197
Pa2g4	3	1.3	1.162	0.2839	0.5285	FALSE	10.3026
Rsbn1	0.4	1.2	-1.439	0.2861	0.5321	FALSE	6.9295
Cc2d1b	2.1	4.3	-0.9693	0.2869	0.533	FALSE	8.0987
Wapl	10.4	6.4	0.6866	0.287	0.533	FALSE	#N/A
Smarcc2	5.2	2.7	0.9324	0.2877	0.5338	FALSE	7.9696
Sart1	57.1	35.5	0.6825	0.2885	0.5347	FALSE	8.8666
Tubb4a	59.8	40.2	0.5691	0.2886	0.5347	FALSE	#N/A
Naca	4.5	8	-0.8186	0.2888	0.5347	FALSE	12.7409
Rai1	4.9	2.1	1.146	0.2895	0.5356	FALSE	7.6504
Srrm2	43.2	105.9	-1.29	0.2943	0.5439	FALSE	11.8788
Cwc15	5.2	10.3	-0.9643	0.298	0.5504	FALSE	6.5719
S100a11	4.6	11.1	-1.259	0.3002	0.5539	FALSE	8.9152
Crkl	20.5	32.2	-0.6475	0.3007	0.5545	FALSE	7.1361
Sart3	12.8	20	-0.6361	0.3014	0.5553	FALSE	11.8929
Pcnp	31.7	45.3	-0.5127	0.3035	0.5587	FALSE	7.7672
Dab2ip	1.1	2.4	-1.08	0.3041	0.5594	FALSE	9.7541
Spdl1	1	2.4	-1.177	0.3056	0.5603	FALSE	#N/A
Asns	0.4	1.2	-1.389	0.3056	0.5603	FALSE	10.4053
Casp8	0.4	1.2	-1.389	0.3056	0.5603	FALSE	7.1091
Ccdc85c	0.4	1.2	-1.389	0.3056	0.5603	FALSE	#N/A
Larp1	45.2	61.3	-0.4379	0.3069	0.5623	FALSE	8.0808
Mapre1	3.9	8.9	-1.175	0.3077	0.5631	FALSE	11.8074
Ppp1ca	3.1	1.5	0.9609	0.3079	0.5631	FALSE	12.9077
Nbn	2.8	5.5	-0.9269	0.3084	0.5636	FALSE	6.7252
Rpsa	2	0.9	1.099	0.3088	0.5639	FALSE	7.0399
Hsp90b1	5.5	2.9	0.8745	0.311	0.5675	FALSE	12.8374
Ywhab	3.2	6.7	-1.03	0.3118	0.568	FALSE	11.4796
Znf532	6.6	3.4	0.9435	0.3118	0.568	FALSE	#N/A
Znf318	8.3	4.2	0.9814	0.3128	0.5687	FALSE	#N/A
CO040	0.7	1.8	-1.194	0.3134	0.5687	FALSE	#N/A
Snrpe	0.7	1.8	-1.194	0.3134	0.5687	FALSE	6.654
Uhrf1bp1l	0.7	1.8	-1.194	0.3134	0.5687	FALSE	8.6779
Wdr33	0.7	1.8	-1.194	0.3134	0.5687	FALSE	7.8865
Ppp1cb	1.6	0.6	1.245	0.3143	0.5698	FALSE	7.2722
Cwc22	1	0.3	1.434	0.316	0.572	FALSE	#N/A
Rad21	1	0.3	1.434	0.316	0.572	FALSE	6.8623
Ccdc124	1	2.4	-1.103	0.3197	0.5783	FALSE	10.3028
Pls3	1.3	3	-1.183	0.3203	0.5789	FALSE	9.2176
Hnrnpa2b1	13.6	19.1	-0.4945	0.3205	0.5789	FALSE	7.764
Smarcc1	3.4	1.7	0.9096	0.3238	0.5842	FALSE	6.7028
Ttc28	3.9	7.4	-0.9153	0.3241	0.5842	FALSE	8.3908
Prrc2a	69.7	47.7	0.545	0.3242	0.5842	FALSE	#N/A
Wipi2	6.2	11.7	-0.8986	0.3251	0.5853	FALSE	8.7893
Pfkl	1.3	3.4	-1.335	0.3254	0.5854	FALSE	12.4771
Ube2o	1	0.3	1.369	0.3258	0.5856	FALSE	11.1342
Pdia3	3.2	1.4	1.076	0.3273	0.5879	FALSE	10.8313
Rps3a	18.9	27.2	-0.5229	0.3278	0.5883	FALSE	9.9226
Ncoa6	5.2	2.8	0.8874	0.3292	0.5905	FALSE	6.9986
Pex5	12.6	20.9	-0.726	0.3297	0.5909	FALSE	9.0131
Skt	0.7	1.8	-1.174	0.3303	0.5915	FALSE	#N/A
Znf281	8.4	5.4	0.633	0.3318	0.5937	FALSE	#N/A
Ctnnd1	55.8	42.2	0.4014	0.3326	0.5947	FALSE	6.7011
Thoc7	2	0.9	1.058	0.333	0.5949	FALSE	12.4043
Ppp2r5c	1.3	2.7	-0.974	0.3341	0.5964	FALSE	9.865
Ddx39b	1	2.1	-1.042	0.3365	0.6	FALSE	#N/A
Krt77	43.3	31.2	0.472	0.3366	0.6	FALSE	6.7
Baiap2	1.9	3.9	-0.9927	0.3371	0.6004	FALSE	7.0451
Gon4l	2.1	0.9	1.082	0.3377	0.6009	FALSE	#N/A
Fosl1	4.6	2.3	0.9569	0.3381	0.6012	FALSE	#N/A
Psmd4	37.9	24	0.6584	0.3386	0.6016	FALSE	13.3147
Rtcb	1.4	2.9	-0.9826	0.339	0.6019	FALSE	#N/A
Ckap4	15.1	9.5	0.6638	0.3403	0.6037	FALSE	6.6878
Psmd2	5.1	3	0.7287	0.3411	0.6047	FALSE	7.0932
Tom1l2	3.8	1.4	1.319	0.3453	0.6114	FALSE	6.7381
Sqstm1	1.3	2.9	-1.14	0.3454	0.6114	FALSE	8.3453
Slu7	19.5	14	0.4716	0.3479	0.6153	FALSE	7.6886
Snx5	3.3	5.6	-0.7483	0.3492	0.6171	FALSE	7.4599
Hist1h1b	118.8	79.4	0.5798	0.3496	0.6173	FALSE	8.0291
Zc3h18	5.6	2.7	1.033	0.3508	0.619	FALSE	9.5134
Cd2bp2	1.4	0.6	1.193	0.3519	0.6205	FALSE	11.6587
Fau	20.1	13.3	0.5885	0.3525	0.6211	FALSE	#N/A
Ccnt1	20.6	14.4	0.5123	0.354	0.6233	FALSE	11.9603
Cdkal1	2.4	1.2	0.9395	0.3545	0.6236	FALSE	7.7211
Ywhae	3.5	7.7	-1.097	0.3551	0.6238	FALSE	7.2877
Wdr46	2	0.9	1.031	0.3553	0.6238	FALSE	6.8404
Dvl3	8.9	5.5	0.6743	0.3554	0.6238	FALSE	6.8707
Eif4g1	99.1	120.8	-0.2859	0.3565	0.6245	FALSE	11.9609
Sh3glb1	4	2.1	0.8632	0.3566	0.6245	FALSE	7.382
Jade3	1.4	0.6	1.163	0.3569	0.6245	FALSE	#N/A
Luc7l3	1.4	0.6	1.163	0.3569	0.6245	FALSE	#N/A
Racgap1	3.4	1.8	0.8295	0.3576	0.6253	FALSE	6.9664
Kif14	3.2	1.5	0.9789	0.3579	0.6253	FALSE	6.96
Naa30	0.6	1.5	-1.107	0.3584	0.6258	FALSE	#N/A
Chaf1b	0.6	1.6	-1.159	0.3601	0.6282	FALSE	10.4266
Chaf1a	10.4	7.1	0.5525	0.3606	0.6285	FALSE	11.0929
Hectd1	1.8	3.6	-0.9662	0.3627	0.6319	FALSE	11.9717
Chd4	66.4	51.8	0.3557	0.365	0.6352	FALSE	10.1207
Ddx42	15.5	22.3	-0.5222	0.3664	0.6372	FALSE	6.6764
Mta2	2.5	4.6	-0.87	0.3708	0.6445	FALSE	11.1896
Dhx9	3.8	2.1	0.8148	0.3715	0.645	FALSE	10.2205
Abcf3	5.1	11.1	-1.099	0.3717	0.645	FALSE	10.6166
Phf2	3.3	1.9	0.7926	0.3732	0.6471	FALSE	8.4332
Wac	2.4	5	-1.024	0.3738	0.6477	FALSE	#N/A
Fam83h	2.5	1.2	0.9627	0.3745	0.6479	FALSE	#N/A
Zcchc17	2.5	1.2	0.9627	0.3745	0.6479	FALSE	9.6529
Sugt1	16.4	11.3	0.5373	0.3751	0.6484	FALSE	7.132
Mtcl1	6	3	0.9788	0.3754	0.6484	FALSE	#N/A
Myo1b	0.6	1.5	-1.095	0.3778	0.6519	FALSE	7.5951
Cltc	7.1	4.6	0.6177	0.3779	0.6519	FALSE	7.939
CQ053	1.3	2.8	-1.036	0.3793	0.6538	FALSE	#N/A
Gatad2b	14.2	21.4	-0.5829	0.3807	0.6557	FALSE	7.2007
Snap47	2.5	1.2	0.9449	0.382	0.6574	FALSE	#N/A
Sarnp	6.4	9.8	-0.6116	0.3835	0.6596	FALSE	#N/A
Hmgb2	0.7	1.6	-1.016	0.3839	0.6597	FALSE	8.609
Ppig	1.4	0.6	1.069	0.385	0.661	FALSE	6.9523
Ddx17	27.5	20.1	0.4509	0.3861	0.6624	FALSE	13.5617
Pcmtd2	0.3	0.9	-1.216	0.3863	0.6624	FALSE	6.8599
Arl6ip4	6.1	3	0.9724	0.387	0.6631	FALSE	12.647
Fkbp4	3.5	1.8	0.908	0.3877	0.6638	FALSE	13.2599
Tubb2b	70.3	48.7	0.5268	0.3888	0.6652	FALSE	13.5195
Srfbp1	5.2	3	0.7833	0.3895	0.6657	FALSE	9.0945
Pum1	1.1	2.1	-0.9017	0.3903	0.6657	FALSE	10.7737
Sh3bp2	1.1	2.1	-0.9017	0.3903	0.6657	FALSE	10.2019
Uri1	9.4	4.6	1.02	0.3904	0.6657	FALSE	#N/A
Zc3h11a	26.9	34.9	-0.3783	0.3906	0.6657	FALSE	6.7223
Copb2	0.3	0.9	-1.197	0.3945	0.6716	FALSE	11.1768
Ywhaq	3.6	6.8	-0.8923	0.3948	0.6716	FALSE	10.0686
Ahctf1	24.9	32.6	-0.3849	0.3952	0.6716	FALSE	9.923
Gsto1	4.6	8.3	-0.8236	0.3952	0.6716	FALSE	10.949
Mastl	2.1	3.7	-0.7929	0.3963	0.6729	FALSE	6.7275
Tpr	32.7	52	-0.6691	0.3971	0.6738	FALSE	11.5434
Rrbp1	71.2	35.6	0.9976	0.3982	0.6753	FALSE	8.9981
Rsl1d1	11.6	8.2	0.4897	0.3988	0.6757	FALSE	9.4055
Cstf2t	5.1	7.6	-0.5594	0.3993	0.6761	FALSE	6.6935
Wars	1	2.1	-0.952	0.4	0.6767	FALSE	10.5626
Hist1h1c	121	85	0.5089	0.4005	0.6772	FALSE	9.0122
Ptma	1	2.1	-0.9318	0.4016	0.6784	FALSE	#N/A
Ccdc12	0.7	1.5	-1.004	0.4022	0.679	FALSE	10.1327
Kansl3	1.4	0.6	1.039	0.4045	0.6823	FALSE	#N/A
Hnrnpf	26.9	20.3	0.4022	0.406	0.6843	FALSE	7.3944
Cnot2	0.6	1.4	-1.053	0.4065	0.6847	FALSE	11.2793
Prkca	1.6	3.7	-1.156	0.4072	0.6854	FALSE	6.7705
Cdkn2aip	2.3	4.2	-0.8118	0.4079	0.6861	FALSE	6.8093
Gpn1	0.7	1.5	-1.02	0.4084	0.6861	FALSE	8.4745
Tubb2a	70.3	49.4	0.5086	0.4085	0.6861	FALSE	6.6997
Syncrip	7.1	4.8	0.5486	0.4113	0.6899	FALSE	9.857
Fiz1	1.3	0.6	0.9994	0.4117	0.6899	FALSE	10.1077
Qrich1	1.3	0.6	0.9994	0.4117	0.6899	FALSE	8.5127
Ccdc25	3.3	5.8	-0.8098	0.4124	0.6907	FALSE	6.8609
Rpl10	4.2	9.9	-1.204	0.4132	0.6914	FALSE	#N/A
Sbno1	5.3	3.3	0.6486	0.4139	0.6921	FALSE	7.251
Paics	3.3	5.2	-0.6264	0.4154	0.6941	FALSE	7.293
Ttf2	2.7	1.5	0.787	0.4157	0.6941	FALSE	9.718
Pcnt	4	2.1	0.9058	0.4191	0.6993	FALSE	8.3878
Zfyve1	0.7	1.5	-0.9879	0.42	0.7002	FALSE	6.9495
Dip2b	0.7	1.5	-0.9635	0.4215	0.7022	FALSE	6.801
Api5	0.3	0.9	-1.133	0.4232	0.7036	FALSE	6.7619
Naa50	0.3	0.9	-1.133	0.4232	0.7036	FALSE	#N/A
Ttc9c	0.3	0.9	-1.133	0.4232	0.7036	FALSE	9.9166
Trim56	3.3	1.9	0.7659	0.4241	0.7046	FALSE	7.0989
Krt1	64.9	49.6	0.3882	0.4247	0.7051	FALSE	#N/A
Tcea1	1.1	2.1	-0.8637	0.4279	0.7094	FALSE	6.7518
Rrp15	1.8	0.9	0.9116	0.4279	0.7094	FALSE	12.0807
Cuedc2	1.3	0.6	0.9724	0.429	0.7096	FALSE	9.7996
Rpl37a	1.3	0.6	0.9724	0.429	0.7096	FALSE	#N/A
Sipa1l1	11.8	18.7	-0.6584	0.429	0.7096	FALSE	10.1051
Ddx18	13	7.3	0.817	0.4295	0.71	FALSE	#N/A
Hist1h1d	137.4	94.7	0.5374	0.4301	0.7103	FALSE	7.0587
Cfl1	8.3	5.5	0.5733	0.4305	0.7103	FALSE	7.9105
Tubb4b	73.2	52.8	0.4694	0.4307	0.7103	FALSE	#N/A
Eef2	27	35.8	-0.4027	0.4312	0.7107	FALSE	7.6216
Nelfa	2.6	1.5	0.7745	0.4338	0.7145	FALSE	#N/A
Adss	1.3	0.6	0.9676	0.4354	0.7159	FALSE	7.0522
Dok1	3.3	5.1	-0.6099	0.4358	0.7159	FALSE	6.7516
Surf6	22.1	17	0.3741	0.4359	0.7159	FALSE	8.0531
Tuba1c	83.7	114.9	-0.4563	0.4359	0.7159	FALSE	#N/A
Krt42	26.9	19.6	0.4524	0.4362	0.7159	FALSE	6.7584
Fxr2	4.4	6.8	-0.6232	0.4368	0.7163	FALSE	9.4808
Rbm22	0.7	1.4	-0.9782	0.4381	0.718	FALSE	6.6901
Usp36	1.7	0.9	0.8872	0.4398	0.72	FALSE	9.1992
Hist1h1e	135.4	94.9	0.5116	0.4404	0.72	FALSE	6.6827
Zbtb33	5.2	2.8	0.8665	0.4405	0.72	FALSE	9.2886
U2surp	11.8	17.7	-0.5747	0.4406	0.72	FALSE	#N/A
Srsf6	6.6	3.6	0.8653	0.4409	0.72	FALSE	#N/A
Serpinh1	4.8	3	0.6343	0.4413	0.7202	FALSE	13.2588
Sash1	2.1	3.6	-0.7163	0.4418	0.7205	FALSE	6.8683
Nat10	13.8	9.4	0.5431	0.4429	0.7218	FALSE	7.6929
Rpn1	1.3	2.5	-0.899	0.4441	0.7231	FALSE	6.9524
Snap29	16.9	24	-0.4984	0.4463	0.7263	FALSE	8.3568
Arhgap32	5.8	8.6	-0.5424	0.4478	0.7282	FALSE	#N/A
Arid5b	6	3.6	0.7345	0.4497	0.7286	FALSE	6.9689
Dnmt1	25.2	14.5	0.7882	0.4498	0.7286	FALSE	11.5405
Cep152	0.4	0.9	-1.056	0.4498	0.7286	FALSE	9.6409
Dnmbp	0.4	0.9	-1.056	0.4498	0.7286	FALSE	6.7629
Riok1	0.4	0.9	-1.056	0.4498	0.7286	FALSE	8.3048
Cwf19l2	4.9	2.7	0.819	0.4501	0.7286	FALSE	9.9188
Sox5	1.7	0.9	0.8676	0.4503	0.7286	FALSE	9.3741
Ift74	4.2	2.4	0.7978	0.4515	0.7296	FALSE	6.8897
Hist1h4a	12	6.2	0.9314	0.4516	0.7296	FALSE	11.5789
Wbp4	4.9	3	0.6805	0.4518	0.7296	FALSE	9.2119
Hist1h1a	22	15.7	0.4906	0.4548	0.7338	FALSE	7.9249
Wwc2	1.9	3.3	-0.7766	0.456	0.7353	FALSE	11.4727
Sowahc	1.7	0.9	0.8305	0.4568	0.7361	FALSE	#N/A
Copa	1.7	3	-0.7185	0.4573	0.7364	FALSE	10.1339
Znf638	11.2	16.7	-0.5674	0.4645	0.7474	FALSE	#N/A
Tubb5	96.4	71.5	0.4318	0.4653	0.7482	FALSE	13.4757
Alb	23.5	17.5	0.4239	0.4667	0.7499	FALSE	6.6564
Vars	5.9	8.5	-0.5224	0.467	0.7499	FALSE	11.3617
Eif2s1	2.1	1.2	0.8143	0.4673	0.7499	FALSE	6.9825
Fam110c	7.7	5.4	0.5016	0.4707	0.7547	FALSE	6.7692
Wdr62	2.4	4.2	-0.7809	0.471	0.7547	FALSE	6.8936
Vps72	2.1	1.2	0.7939	0.4719	0.7557	FALSE	7.9749
Cfap36	0.7	1.5	-0.8797	0.4735	0.7576	FALSE	#N/A
Mpp1	5.6	3.4	0.6946	0.4751	0.7596	FALSE	6.978
Zmym4	2.1	3.4	-0.6755	0.4755	0.7598	FALSE	6.9412
Nmt2	3.7	2.3	0.6438	0.477	0.7618	FALSE	6.733
Brd9	1.4	2.5	-0.7565	0.4789	0.762	FALSE	9.8939
Tnrc6b	33.8	23.5	0.521	0.483	0.762	FALSE	7.0842
Mcm5	2.6	4.9	-0.8654	0.4832	0.762	FALSE	13.0324
Actr3	0.7	0.3	1.035	0.4845	0.762	FALSE	9.5762
Adrm1	0.7	0.3	1.035	0.4845	0.762	FALSE	9.2909
Apex2	0.7	0.3	1.035	0.4845	0.762	FALSE	6.7539
Atxn1l	0.7	0.3	1.035	0.4845	0.762	FALSE	10.0694
Dtna	0.7	0.3	1.035	0.4845	0.762	FALSE	7.486
Edf1	0.7	0.3	1.035	0.4845	0.762	FALSE	12.3009
Epc2	0.7	0.3	1.035	0.4845	0.762	FALSE	#N/A
Fam195a	0.7	0.3	1.035	0.4845	0.762	FALSE	#N/A
Fam195b	0.7	0.3	1.035	0.4845	0.762	FALSE	#N/A
Hspa14	0.7	0.3	1.035	0.4845	0.762	FALSE	6.5861
Nup35	0.7	0.3	1.035	0.4845	0.762	FALSE	6.7499
Nup93	0.7	0.3	1.035	0.4845	0.762	FALSE	12.4109
Ppie	0.7	0.3	1.035	0.4845	0.762	FALSE	11.2766
Rfc4	0.7	0.3	1.035	0.4845	0.762	FALSE	9.4646
Rnf20	0.7	0.3	1.035	0.4845	0.762	FALSE	6.8604
Srsf2	0.7	0.3	1.035	0.4845	0.762	FALSE	#N/A
Stard13	0.7	0.3	1.035	0.4845	0.762	FALSE	8.1496
Ufd1l	0.7	0.3	1.035	0.4845	0.762	FALSE	7.1041
Znf827	0.7	0.3	1.035	0.4845	0.762	FALSE	#N/A
Prpf40a	3.6	2.1	0.7694	0.4855	0.7631	FALSE	7.6056
Actb	71.5	48.9	0.5468	0.4866	0.7643	FALSE	13.4518
Rps20	2.4	3.7	-0.5858	0.4878	0.7656	FALSE	6.7388
Atp5b	25	14.7	0.7546	0.4883	0.766	FALSE	13.4943
Rpl14	6.3	4	0.6386	0.491	0.7688	FALSE	7.2258
Arfgap3	3	4.5	-0.5628	0.4911	0.7688	FALSE	7.8551
Snx2	2.6	4.1	-0.6476	0.4911	0.7688	FALSE	10.9692
Wdr70	8.3	11.6	-0.4636	0.4915	0.7688	FALSE	8.4359
Chmp2b	4.4	6.4	-0.5276	0.4927	0.7702	FALSE	6.9255
Eno1	4.9	6.9	-0.4946	0.4932	0.7704	FALSE	13.12
Nfia	2.1	1.2	0.743	0.494	0.7706	FALSE	6.6797
Sgol2	2.1	1.2	0.743	0.494	0.7706	FALSE	9.0765
Calm1	2.2	3.6	-0.672	0.4947	0.7712	FALSE	6.6591
Nelfe	3.7	5.3	-0.5106	0.4972	0.7745	FALSE	#N/A
Ubap1	1.6	0.9	0.7979	0.4985	0.7758	FALSE	9.2577
Nufip2	90.8	75.8	0.2603	0.4987	0.7758	FALSE	6.7644
Pcbp1	48.6	58.4	-0.2629	0.4992	0.7761	FALSE	10.8122
Phgdh	5.1	3.4	0.5718	0.4998	0.7765	FALSE	7.0669
Cct5	2.5	1.5	0.7178	0.5009	0.7777	FALSE	7.1943
Senp6	2	1.2	0.6809	0.5025	0.7797	FALSE	6.8096
Fus	4.4	3	0.5305	0.5031	0.7801	FALSE	8.4519
Bcl9l	1.7	2.8	-0.6509	0.5044	0.7816	FALSE	8.8523
Ruvbl1	63.3	52.9	0.257	0.505	0.782	FALSE	11.9094
Eprs	8.2	13.5	-0.7187	0.506	0.7831	FALSE	7.6449
Riok3	1	1.8	-0.7534	0.5064	0.7831	FALSE	9.8249
Actg1	72	50.4	0.512	0.5068	0.7832	FALSE	#N/A
Knop1	13	7.3	0.8251	0.5091	0.7862	FALSE	#N/A
Hist1h2ah	10.4	6.4	0.6819	0.5094	0.7862	FALSE	12.9862
Zhx3	2.1	1.2	0.7222	0.5102	0.7867	FALSE	7.3132
Otud4	13.4	8.7	0.6112	0.5104	0.7867	FALSE	8.6135
Dsp	7	4.4	0.6645	0.5111	0.7872	FALSE	6.7
Mnat1	2	3.1	-0.577	0.5142	0.791	FALSE	9.4699
Cdk1	7.4	4.9	0.5633	0.5144	0.791	FALSE	#N/A
Rangap1	27.2	33.2	-0.2897	0.5146	0.791	FALSE	13.0193
Krt15	40.2	32	0.3277	0.5157	0.7916	FALSE	7.0766
Rbbp6	25.2	17	0.5668	0.5158	0.7916	FALSE	7.3074
Ecd	5.7	7.7	-0.433	0.516	0.7916	FALSE	10.7513
Rpl35	17.4	12.8	0.4411	0.5167	0.7922	FALSE	13.3627
Dclk1	1.3	2.2	-0.6524	0.519	0.7952	FALSE	7.2395
Krt10	71.9	56.6	0.3443	0.5212	0.7979	FALSE	10.1983
Pdzrn3	2.3	1.2	0.8082	0.5216	0.798	FALSE	9.7636
Srpk1	4.6	3	0.5989	0.5264	0.8049	FALSE	10.6677
Slc25a5	3.6	6.1	-0.7494	0.5296	0.8092	FALSE	13.1121
Hist2h2ac	9.7	6.2	0.6449	0.5302	0.8096	FALSE	13.3324
Acat2	1.3	2.1	-0.696	0.5338	0.8143	FALSE	10.0453
Cct7	1.1	0.6	0.8064	0.5343	0.8143	FALSE	8.0992
Gapdh	7.6	5.5	0.4663	0.5344	0.8143	FALSE	13.0151
Stk4	0.6	1.2	-0.785	0.5362	0.8166	FALSE	8.6578
Zmat2	5.8	4.3	0.4373	0.5379	0.8185	FALSE	6.8017
Rps8	25.4	20	0.3382	0.5382	0.8185	FALSE	13.0953
Haus8	1.3	2.1	-0.623	0.5388	0.8189	FALSE	#N/A
Fgfr3	1.6	0.9	0.7145	0.5418	0.8226	FALSE	6.7692
Ap3d1	6.4	4.4	0.5226	0.542	0.8226	FALSE	10.8694
Tnrc6a	8.3	6.1	0.4309	0.5449	0.8264	FALSE	10.6279
Fgd6	0.7	0.3	0.8782	0.5463	0.8276	FALSE	7.6605
Pros1	0.7	0.3	0.8782	0.5463	0.8276	FALSE	9.1912
Sipa1l2	8.8	5.7	0.6079	0.547	0.8281	FALSE	7.7694
Nup62	1.9	3.3	-0.7687	0.548	0.8291	FALSE	11.7188
Fasn	11.2	6.9	0.6822	0.5487	0.8295	FALSE	6.963
Ppil4	3	4.3	-0.4834	0.5499	0.8309	FALSE	6.7045
Foxk2	4.6	3.1	0.5604	0.5505	0.8312	FALSE	10.1516
Rad18	6.7	4.6	0.5473	0.5514	0.832	FALSE	7.2711
Casp12	0.7	1.2	-0.746	0.5532	0.8336	FALSE	6.9496
Kif2a	0.7	1.2	-0.746	0.5532	0.8336	FALSE	7.2586
Znf598	2.5	1.5	0.6299	0.5537	0.8338	FALSE	#N/A
Rbm39	11.5	8.2	0.4815	0.5552	0.8351	FALSE	#N/A
Fmr1	12.4	17.5	-0.4875	0.5553	0.8351	FALSE	8.3351
Capn2	1.6	0.9	0.688	0.5584	0.8392	FALSE	7.1563
Rbm27	6.8	8.9	-0.3788	0.5592	0.8399	FALSE	6.5777
Ankrd49	0.7	1.2	-0.7041	0.5599	0.8404	FALSE	9.3251
Arfgap2	16.4	12.7	0.3616	0.562	0.843	FALSE	9.9021
Hdgfrp2	3.9	2.5	0.6176	0.5625	0.8432	FALSE	12.7138
Krt73	34	28.8	0.239	0.5639	0.8448	FALSE	6.8107
Eif4g3	19.5	14	0.4731	0.5646	0.8453	FALSE	#N/A
Zfp36l2	3.1	2.1	0.5283	0.5677	0.8493	FALSE	6.9503
Gnb2l1	1.3	2.1	-0.6318	0.5683	0.8496	FALSE	8.051
Krt16	24.6	18.9	0.378	0.5692	0.8505	FALSE	6.716
Eif5b	14.4	10.6	0.4348	0.5702	0.8513	FALSE	8.2944
Nol10	5.4	4	0.4362	0.5705	0.8513	FALSE	11.2835
Irf2bpl	4.1	5.5	-0.4109	0.5717	0.8526	FALSE	#N/A
Llph	1.4	0.8	0.6987	0.5734	0.8529	FALSE	7.9643
Hcfc1	57	48.9	0.2197	0.5735	0.8529	FALSE	10.6217
Cep162	3	1.9	0.6406	0.5738	0.8529	FALSE	#N/A
Ccser2	0.7	1.2	-0.6893	0.5738	0.8529	FALSE	#N/A
Hat1	0.7	1.2	-0.6893	0.5738	0.8529	FALSE	13.1204
Kdm5a	1.1	0.6	0.7119	0.5764	0.8552	FALSE	#N/A
Timeless	1.1	0.6	0.7119	0.5764	0.8552	FALSE	10.557
Nkap	9.2	5.7	0.6634	0.5764	0.8552	FALSE	#N/A
Lrrc59	3.2	2.1	0.5908	0.5772	0.8555	FALSE	11.8483
Rprd2	7.5	5.8	0.3586	0.5774	0.8555	FALSE	6.8407
Rpl23a	25.2	19.6	0.3595	0.58	0.8588	FALSE	#N/A
Wbp11	3.9	6	-0.6129	0.5821	0.8604	FALSE	11.2519
Ranbp3	24.3	29.9	-0.2974	0.5821	0.8604	FALSE	7.7515
Srp68	8.5	10.8	-0.3331	0.5825	0.8604	FALSE	8.0289
Mvp	6.9	9.3	-0.4368	0.5826	0.8604	FALSE	7.151
Cyld	2.1	3.1	-0.5353	0.5837	0.8615	FALSE	9.213
Rps4x	5.1	8.6	-0.7346	0.5842	0.8618	FALSE	13.6109
Hnrnpd	3.2	4.8	-0.5879	0.5849	0.8621	FALSE	7.1254
Fam50a	8.4	5.7	0.5374	0.5856	0.8626	FALSE	#N/A
Ddx10	3.5	2.4	0.5086	0.5869	0.8639	FALSE	7.2757
Cep55	3.1	4.2	-0.4255	0.5872	0.8639	FALSE	7.2609
Prr14	2	1.2	0.6174	0.5884	0.8651	FALSE	9.9743
Ssfa2	4.9	3.2	0.5967	0.5894	0.8661	FALSE	8.0496
Mcm4	4.6	6.2	-0.4399	0.5904	0.867	FALSE	13.3445
Frg1	6.5	4.9	0.4119	0.5922	0.869	FALSE	7.0168
Ran	5.2	7.7	-0.5531	0.5969	0.8746	FALSE	8.3574
Gtf2f2	12.7	10.3	0.2945	0.5969	0.8746	FALSE	10.5292
Ubxn7	4.2	2.8	0.5743	0.5971	0.8746	FALSE	#N/A
Ccdc50	1.4	2.1	-0.5655	0.5985	0.8758	FALSE	7.6171
Mef2d	3.7	2.6	0.5138	0.5987	0.8758	FALSE	6.9774
Cdk11b	1.1	1.8	-0.6259	0.6003	0.8775	FALSE	#N/A
Mdc1	12.3	9.7	0.3322	0.6006	0.8775	FALSE	6.6525
Morc2a	1	0.6	0.6729	0.6017	0.8779	FALSE	11.3827
Rp1	1	0.6	0.6729	0.6017	0.8779	FALSE	#N/A
Krt8	19.5	26.2	-0.4249	0.6032	0.8785	FALSE	8.7572
Ddx3x	53.2	62.5	-0.2313	0.6042	0.8785	FALSE	9.1261
Zeb1	3.5	2.4	0.5428	0.6045	0.8785	FALSE	9.1578
Mmtag2	7.8	5.1	0.6021	0.6047	0.8785	FALSE	#N/A
Fam208b	3.1	2.1	0.5463	0.6047	0.8785	FALSE	#N/A
Smg7	3.1	2.1	0.5463	0.6047	0.8785	FALSE	10.9465
Champ1	30	22.8	0.393	0.6054	0.8785	FALSE	#N/A
Zw10	1.6	2.4	-0.5631	0.6056	0.8785	FALSE	8.0347
Knstrn	4.6	3.1	0.5596	0.6061	0.8785	FALSE	#N/A
Arhgap6	0.7	1.2	-0.6384	0.6065	0.8785	FALSE	6.9558
Rpap1	0.7	1.2	-0.6384	0.6065	0.8785	FALSE	10.9556
Psmd11	1	1.5	-0.5769	0.6067	0.8785	FALSE	7.9409
Prpf8	1.4	0.9	0.6012	0.6074	0.8785	FALSE	10.7169
Tbc1d2b	1.4	0.9	0.6012	0.6074	0.8785	FALSE	7.7215
Mcm7	2	3.1	-0.6231	0.6151	0.8887	FALSE	10.0204
Cyfip1	1	0.6	0.6459	0.6153	0.8887	FALSE	7.2866
Krt72	11.1	13.9	-0.3215	0.618	0.8921	FALSE	#N/A
Mad1l1	4.4	5.8	-0.3748	0.6188	0.8927	FALSE	7.4302
Sdad1	1.4	0.9	0.5817	0.6193	0.8927	FALSE	9.2649
Ric8a	1.3	2	-0.5438	0.6196	0.8927	FALSE	#N/A
Yap1	38.8	30.3	0.3562	0.6216	0.8951	FALSE	10.5738
Tufm	2.2	1.5	0.5318	0.6222	0.8954	FALSE	12.966
Copg2	23	28.4	-0.2984	0.6251	0.899	FALSE	6.8807
Ccdc94	2.4	3.3	-0.4574	0.626	0.8996	FALSE	7.5422
Nucks1	3.9	2.7	0.5172	0.6263	0.8996	FALSE	8.5378
Rps14	1.1	0.7	0.6232	0.6277	0.9011	FALSE	13.3666
Pcna	3.9	2.5	0.6155	0.629	0.9023	FALSE	7.5636
Krt76	28	23.9	0.2277	0.6307	0.9037	FALSE	#N/A
Shoc2	1	0.6	0.6223	0.6309	0.9037	FALSE	6.7852
Fam63a	1	1.5	-0.5354	0.6311	0.9037	FALSE	#N/A
Prrc2c	215.4	190.6	0.1764	0.6315	0.9037	FALSE	#N/A
Emd	5.1	4	0.3531	0.6351	0.9083	FALSE	7.5875
Bcas2	2	2.8	-0.4228	0.6356	0.9084	FALSE	10.6744
Krt74	28	23.9	0.2283	0.6365	0.9091	FALSE	6.7845
Kdm4a	3.8	4.9	-0.355	0.6378	0.9105	FALSE	#N/A
Dock7	2.8	4	-0.5065	0.6388	0.9113	FALSE	6.8025
Atxn2	9.5	11.5	-0.2706	0.6409	0.9134	FALSE	10.9607
Ddx39a	1	1.5	-0.5475	0.6415	0.9134	FALSE	#N/A
Alyref	3.9	2.8	0.494	0.6421	0.9134	FALSE	#N/A
Set	4.1	3	0.4038	0.6428	0.9134	FALSE	10.6183
Rbm14	1.4	0.9	0.5434	0.6436	0.9134	FALSE	7.7291
Rars	34.4	41.3	-0.2618	0.6441	0.9134	FALSE	11.1705
Syn2	0.7	1.2	-0.5839	0.6441	0.9134	FALSE	6.9394
Cct6a	14.4	11.9	0.2675	0.6447	0.9134	FALSE	12.3096
Samd4a	1	0.6	0.5953	0.6448	0.9134	FALSE	#N/A
Glmn	1.3	0.9	0.5317	0.6452	0.9134	FALSE	6.733
Hba	1.8	1.2	0.5081	0.6454	0.9134	FALSE	#N/A
Kmt2d	1.8	1.2	0.5081	0.6454	0.9134	FALSE	#N/A
D10Wsu102e	1.4	0.9	0.5365	0.6455	0.9134	FALSE	8.9931
Krt2	49.8	43.6	0.1925	0.6464	0.9142	FALSE	6.6804
Dync1h1	6.5	5.2	0.3105	0.6484	0.916	FALSE	9.2382
Camk2d	0.7	1.1	-0.5857	0.6504	0.916	FALSE	7.0273
Soga3	0.7	1.1	-0.5857	0.6504	0.916	FALSE	#N/A
Bud13	0.3	0.6	-0.6649	0.6522	0.916	FALSE	9.9675
Exoc8	0.3	0.6	-0.6649	0.6522	0.916	FALSE	9.9838
Ilf3	0.3	0.6	-0.6649	0.6522	0.916	FALSE	11.3816
Nwc	0.3	0.6	-0.6649	0.6522	0.916	FALSE	#N/A
Psmd12	0.3	0.6	-0.6649	0.6522	0.916	FALSE	9.5385
Rsrc1	0.3	0.6	-0.6649	0.6522	0.916	FALSE	9.2823
Tbc1d25	0.3	0.6	-0.6649	0.6522	0.916	FALSE	7.968
Txlng	0.3	0.6	-0.6649	0.6522	0.916	FALSE	#N/A
Cct2	10.2	8.3	0.2813	0.6525	0.916	FALSE	7.0375
Pfdn1	1.3	0.9	0.5122	0.6573	0.9222	FALSE	7.3021
Tnrc6c	2.5	3.3	-0.4044	0.6584	0.9232	FALSE	9.5024
Gtf2e1	5.5	4.2	0.3779	0.66	0.9249	FALSE	10.1174
Krt5	55.8	49.2	0.1828	0.6605	0.9251	FALSE	6.7802
Pkm	33.9	28.4	0.2555	0.6631	0.9281	FALSE	#N/A
Ddx41	4.1	3.1	0.3898	0.6649	0.9301	FALSE	10.3524
Polh	4	3.1	0.3599	0.6675	0.9312	FALSE	6.877
Dido1	28.4	22.5	0.332	0.668	0.9312	FALSE	8.274
Eif3c	9	11	-0.2855	0.6682	0.9312	FALSE	#N/A
Ncoa5	1.9	1.3	0.5472	0.6683	0.9312	FALSE	10.9764
Fam32a	2.1	2.9	-0.4527	0.6684	0.9312	FALSE	#N/A
rp9	1.4	0.9	0.5062	0.6688	0.9312	FALSE	10.087
Dgcr8	1	0.6	0.5538	0.6693	0.9312	FALSE	8.9609
Arhgap31	3.9	5.2	-0.4056	0.6696	0.9312	FALSE	#N/A
Csde1	57.4	64.4	-0.1657	0.6696	0.9312	FALSE	12.2699
Dhx29	1.7	2.4	-0.4473	0.6698	0.9312	FALSE	8.7037
Rcc2	1.6	1.1	0.5048	0.6731	0.9346	FALSE	8.0439
Gcn1	4.9	3.5	0.4716	0.6732	0.9346	FALSE	#N/A
Nap1l4	10.8	8.8	0.2978	0.6734	0.9346	FALSE	13.4086
Aven	15.1	17.7	-0.2258	0.6743	0.9352	FALSE	8.6693
Srsf5	2.5	1.8	0.4404	0.676	0.9365	FALSE	#N/A
Zranb2	2.5	1.8	0.4404	0.676	0.9365	FALSE	11.7338
Lemd3	2.8	2.1	0.3967	0.6769	0.9371	FALSE	#N/A
Bub1b	1.1	1.5	-0.4743	0.6778	0.9373	FALSE	10.855
Hdac6	1.1	1.5	-0.4743	0.6778	0.9373	FALSE	7.5671
Capza2	1.3	1.8	-0.4213	0.6788	0.9379	FALSE	6.9021
Rpl26	6.4	4.3	0.5551	0.6793	0.9379	FALSE	12.4994
Arglu1	36.6	24.1	0.5984	0.6795	0.9379	FALSE	11.9601
Rpl32	4.2	3.1	0.4303	0.6809	0.9392	FALSE	13.1384
Trio	7.1	5.9	0.279	0.6818	0.9394	FALSE	11.2319
Fosl2	2.4	1.7	0.4581	0.682	0.9394	FALSE	7.3623
Jup	8.8	6.5	0.4189	0.6822	0.9394	FALSE	6.7756
Ncoa1	1.1	1.5	-0.4458	0.6872	0.9457	FALSE	6.7966
Hirip3	1.8	2.4	-0.4229	0.6877	0.9457	FALSE	10.8285
Cct3	5.9	4.6	0.3501	0.688	0.9457	FALSE	13.3114
Hnrnpa3	11	13.2	-0.2627	0.6895	0.9472	FALSE	#N/A
Krt85	2.7	3.4	-0.3401	0.6915	0.9494	FALSE	#N/A
Pold3	2.7	2.1	0.3685	0.6932	0.9498	FALSE	10.6691
Krt28	5.6	7.5	-0.413	0.6933	0.9498	FALSE	6.7977
Mnt	1.3	0.9	0.4484	0.6954	0.9498	FALSE	7.0908
Ccdc92	2	1.5	0.3878	0.6958	0.9498	FALSE	8.4769
Alkbh5	0.4	0.6	-0.5683	0.6972	0.9498	FALSE	8.4093
Atn1	0.4	0.6	-0.5683	0.6972	0.9498	FALSE	6.8808
Ccz1	0.4	0.6	-0.5683	0.6972	0.9498	FALSE	#N/A
Commd8	0.4	0.6	-0.5683	0.6972	0.9498	FALSE	7.2088
Eif3b	0.4	0.6	-0.5683	0.6972	0.9498	FALSE	9.5762
Hspbp1	0.4	0.6	-0.5683	0.6972	0.9498	FALSE	#N/A
Otud6b	0.4	0.6	-0.5683	0.6972	0.9498	FALSE	7.5153
Ppm1a	0.4	0.6	-0.5683	0.6972	0.9498	FALSE	10.4987
Taf8	0.4	0.6	-0.5683	0.6972	0.9498	FALSE	6.868
Pgk2	0.6	0.9	-0.5005	0.6996	0.9516	FALSE	6.6499
Tenc1	0.6	0.9	-0.5005	0.6996	0.9516	FALSE	7.0671
Arhgef2	2	1.5	0.3971	0.6997	0.9516	FALSE	7.5653
Eps8	17.5	20	-0.1948	0.701	0.9527	FALSE	6.7473
Znf131	2.6	3.4	-0.368	0.7015	0.9529	FALSE	#N/A
Dnajc8	2.5	3.3	-0.3986	0.7029	0.9534	FALSE	10.3123
Msh6	5.2	6.3	-0.2861	0.7029	0.9534	FALSE	11.8972
Krt4	16.2	18.9	-0.2137	0.7032	0.9534	FALSE	6.9984
Sap130	3.1	2.4	0.323	0.7055	0.956	FALSE	9.1331
Ppid	1.8	2.4	-0.3964	0.7074	0.958	FALSE	12.7048
Prpf4	2.7	2.1	0.3524	0.7089	0.9595	FALSE	8.0561
Crtc3	2.6	3.7	-0.513	0.7093	0.9595	FALSE	7.1998
Atp5a1	31.3	23.1	0.4349	0.71	0.9598	FALSE	9.5347
Pola2	0.6	0.9	-0.4817	0.7108	0.9601	FALSE	10.7718
Fxr1	9	10.7	-0.2484	0.7113	0.9601	FALSE	#N/A
Tcof1	69.3	46.6	0.5727	0.7118	0.9601	FALSE	10.2452
Tns3	4.2	5.1	-0.2803	0.712	0.9601	FALSE	9.0768
Cul4b	4.1	5.1	-0.3317	0.7122	0.9601	FALSE	9.8151
R3hcc1l	1.5	2.1	-0.4465	0.7127	0.9601	FALSE	#N/A
Brd4	21	16.2	0.3742	0.7163	0.9639	FALSE	12.6948
Ppp1r10	15.6	18.3	-0.229	0.7163	0.9639	FALSE	11.1828
Usp4	1.7	2.2	-0.3537	0.7168	0.9639	FALSE	9.0683
CA198	23.2	19.9	0.2197	0.7173	0.964	FALSE	#N/A
Zwint	6.9	8.2	-0.2495	0.7225	0.9706	FALSE	11.6062
Hspa4l	2.9	3.8	-0.3919	0.724	0.9714	FALSE	6.8596
Rpl9	1.7	1.2	0.3975	0.724	0.9714	FALSE	13.5093
Rpl15	2.6	1.9	0.4408	0.7262	0.9737	FALSE	#N/A
Uap1l1	1.6	2.1	-0.3413	0.7311	0.9796	FALSE	8.5199
Snd1	18.7	21.6	-0.2049	0.7314	0.9796	FALSE	7.4814
Shc1	7.8	9.2	-0.2302	0.7321	0.9797	FALSE	11.4548
Gtpbp1	1.4	1.8	-0.3518	0.7324	0.9797	FALSE	10.3536
Sh3pxd2a	9.3	10.8	-0.2083	0.7341	0.9815	FALSE	6.9852
Nsfl1c	13.7	15.8	-0.1992	0.7347	0.9817	FALSE	9.789
Pabpn1	2.9	3.6	-0.2949	0.7354	0.9821	FALSE	12.754
Nmt1	1.1	1.4	-0.3916	0.737	0.9833	FALSE	12.0344
Ccdc43	0.6	0.9	-0.4366	0.738	0.9833	FALSE	9.5788
Pkn2	0.6	0.9	-0.4366	0.738	0.9833	FALSE	8.8553
Scaf8	0.6	0.9	-0.4366	0.738	0.9833	FALSE	#N/A
Zmat3	1.4	1.8	-0.3659	0.7389	0.9839	FALSE	8.9135
Exosc10	5.5	7.1	-0.356	0.7395	0.9842	FALSE	8.2449
Cacybp	3.4	4.2	-0.3107	0.7419	0.9868	FALSE	7.4214
Gnas	4.5	3.4	0.3995	0.745	0.9904	FALSE	9.3492
Rpl19	27.6	38.2	-0.4672	0.7455	0.9905	FALSE	12.6387
Anln	5.6	7.3	-0.3774	0.746	0.9905	FALSE	10.4233
Vcpip1	90.3	82.7	0.1264	0.7476	0.992	FALSE	6.6982
Eif4a1	5.9	4.7	0.3087	0.75	0.9946	FALSE	13.3459
Tlk1	0.7	0.9	-0.4071	0.7521	0.9969	FALSE	11.1678
Sltm	2.1	2.7	-0.3012	0.7549	1	FALSE	9.3103
Kiaa1551	3.1	2.5	0.2751	0.757	1	FALSE	#N/A
Irf2bp2	8.4	9.6	-0.2031	0.7584	1	FALSE	7.4728
Agfg2	4.2	3.3	0.3438	0.7588	1	FALSE	8.6467
Rbm33	12.8	14.7	-0.2012	0.7643	1	FALSE	#N/A
Hnrnpa1	13.3	14.8	-0.156	0.7685	1	FALSE	#N/A
Taok1	3.6	4.6	-0.3485	0.7703	1	FALSE	9.5881
H3f3c	2.7	3.3	-0.2456	0.7705	1	FALSE	#N/A
Lars	1.9	1.6	0.2978	0.7738	1	FALSE	13.0086
Abcf1	13.6	11.8	0.1989	0.7769	1	FALSE	12.7817
Eef1b	1.4	1.8	-0.3068	0.7779	1	FALSE	#N/A
CS043	4.6	5.6	-0.2691	0.7781	1	FALSE	#N/A
Grb14	3.6	3	0.2671	0.7787	1	FALSE	6.8063
Sh3gl1	12.1	13.5	-0.1632	0.7787	1	FALSE	10.1809
Pebp1	1.1	1.4	-0.3483	0.7795	1	FALSE	9.2319
Prpf3	29	26.2	0.1491	0.7842	1	FALSE	11.3711
Emc8	0.7	0.9	-0.3505	0.7844	1	FALSE	#N/A
Kif3c	0.7	0.9	-0.3505	0.7844	1	FALSE	9.5592
S100a10	0.7	0.9	-0.3505	0.7844	1	FALSE	7.4003
Rnf219	3.2	3.9	-0.2853	0.788	1	FALSE	10.2574
Nudcd3	2	2.4	-0.2813	0.7883	1	FALSE	7.8026
Tlk2	0.7	0.9	-0.3425	0.7918	1	FALSE	11.0665
Use1	1	1.2	-0.3199	0.798	1	FALSE	12.3966
Rpl29	62.1	52.6	0.2408	0.7987	1	FALSE	12.8369
Wdhd1	24.8	27.8	-0.1624	0.8016	1	FALSE	7.1804
Spg20	1.4	1.1	0.3014	0.8021	1	FALSE	9.0819
Rpl27a	13.8	11.1	0.3059	0.8022	1	FALSE	13.1434
Frmd4a	2.5	3	-0.2801	0.8023	1	FALSE	9.7876
Atp1a1	10.5	13.9	-0.3984	0.8026	1	FALSE	13.1828
Znf207	1.4	1.8	-0.2771	0.803	1	FALSE	#N/A
Vamp3	4.4	5.9	-0.3951	0.8034	1	FALSE	12.1977
Rfx1	2.9	3.4	-0.2307	0.8039	1	FALSE	10.1172
Mustn1	1.1	0.8	0.3119	0.8042	1	FALSE	6.729
Sh3d19	9.9	10.9	-0.1424	0.8047	1	FALSE	7.0051
Pml	3.1	2.7	0.2115	0.8048	1	FALSE	8.4202
Pcbp3	22.6	24.5	-0.1151	0.8092	1	FALSE	7.9758
Gpalpp1	1.8	2.1	-0.2551	0.81	1	FALSE	#N/A
Snx1	9.4	10.4	-0.1426	0.81	1	FALSE	8.2121
Xab2	3.1	3.6	-0.1999	0.8102	1	FALSE	6.9875
Rps2	6.3	5.5	0.1901	0.8114	1	FALSE	13.6581
Mtfr1l	1.3	1.6	-0.2716	0.812	1	FALSE	#N/A
Trim28	41.2	44.5	-0.1094	0.8124	1	FALSE	12.8336
Znf326	0.7	0.9	-0.3054	0.8124	1	FALSE	#N/A
Eif5a	6.7	5.5	0.2733	0.8125	1	FALSE	12.5988
Msantd2	7.7	8.6	-0.1558	0.8139	1	FALSE	#N/A
Med1	5.6	4.8	0.2205	0.8143	1	FALSE	7.8991
Crk	72.3	79.5	-0.137	0.8144	1	FALSE	10.8153
Luc7l	3.6	3	0.255	0.8146	1	FALSE	11.6649
Svil	13.3	14.8	-0.162	0.8156	1	FALSE	6.9113
Smap2	2.5	2.1	0.2418	0.8189	1	FALSE	10.1198
Nfatc1	7.4	6.4	0.2021	0.8192	1	FALSE	7.2267
Nbr1	2.1	1.8	0.228	0.8198	1	FALSE	6.9433
Nedd1	4.8	4.2	0.1705	0.8214	1	FALSE	9.5111
Mast4	4.2	5	-0.2464	0.8237	1	FALSE	9.6894
Csrp1	0.7	0.9	-0.2858	0.8246	1	FALSE	9.1471
Ddit3	0.7	0.9	-0.2858	0.8246	1	FALSE	7.4551
Fkbp3	0.7	0.9	-0.2858	0.8246	1	FALSE	6.7378
Rbm3	0.7	0.9	-0.2858	0.8246	1	FALSE	6.869
Setdb1	0.7	0.9	-0.2858	0.8246	1	FALSE	8.6436
Tulp4	0.7	0.9	-0.2858	0.8246	1	FALSE	9.8045
Srrm1	4.3	3.6	0.2384	0.8253	1	FALSE	7.1959
Lgals1	1.4	1.2	0.2486	0.8271	1	FALSE	10.0777
Gnai2	4.2	3.4	0.2906	0.8288	1	FALSE	10.7635
Pcbp2	26.8	28.7	-0.09905	0.8297	1	FALSE	12.7933
Hnrnpdl	3.2	3.7	-0.1897	0.8347	1	FALSE	#N/A
Rpl18	4.7	4	0.2144	0.8351	1	FALSE	13.191
Aebp1	2.1	2.4	-0.2114	0.8359	1	FALSE	7.8957
Ccdc88a	36.8	39.9	-0.1133	0.8377	1	FALSE	8.6442
Cbll1	0.7	0.6	0.2764	0.8397	1	FALSE	6.6373
Cep131	0.7	0.6	0.2764	0.8397	1	FALSE	#N/A
Marf1	0.7	0.6	0.2764	0.8397	1	FALSE	#N/A
Psmc5	0.7	0.6	0.2764	0.8397	1	FALSE	11.9328
Secisbp2l	0.7	0.6	0.2764	0.8397	1	FALSE	#N/A
Setd3	0.7	0.6	0.2764	0.8397	1	FALSE	7.7748
Txn	0.7	0.6	0.2764	0.8397	1	FALSE	#N/A
Smg6	1.1	0.9	0.2442	0.8405	1	FALSE	8.3179
Myo1c	3.7	4.1	-0.1611	0.841	1	FALSE	7.2607
S100a6	2.8	2.4	0.2067	0.8416	1	FALSE	8.3866
Krt6a	38.4	41.1	-0.09924	0.8429	1	FALSE	6.6825
Usp53	1	1.2	-0.2384	0.8453	1	FALSE	6.7262
Rpl7a	13	15.5	-0.246	0.8459	1	FALSE	7.0323
Cdk13	3.7	3.3	0.1485	0.8484	1	FALSE	#N/A
Capza1	1.3	1.6	-0.1986	0.8498	1	FALSE	6.9962
Zc3h15	2	1.8	0.1808	0.8501	1	FALSE	9.197
Erf	2.4	2.1	0.1709	0.8532	1	FALSE	7.6307
Son	28.9	31.1	-0.1052	0.8545	1	FALSE	7.0451
Nfat5	6.1	6.6	-0.123	0.8552	1	FALSE	8.2183
Mtdh	24.2	21.9	0.1421	0.8558	1	FALSE	9.0383
Akap1	7.6	8.2	-0.115	0.8562	1	FALSE	8.4795
Gtf2a1	3.7	3.4	0.1413	0.8562	1	FALSE	7.0363
Naf1	1.3	1.5	-0.2022	0.8591	1	FALSE	#N/A
Rpl8	20	17.3	0.2025	0.8591	1	FALSE	#N/A
Fam208a	1.4	1.2	0.1977	0.8602	1	FALSE	#N/A
Pdia6	1.4	1.2	0.1977	0.8602	1	FALSE	7.4161
Rpl36a	1.4	1.2	0.1977	0.8602	1	FALSE	12.9602
Ttk	2.1	1.8	0.1829	0.8629	1	FALSE	6.8314
Ddx6	4	3.6	0.1377	0.863	1	FALSE	10.2338
Pspc1	3.2	3.6	-0.1805	0.8638	1	FALSE	7.4913
Ctif	1	1.2	-0.1983	0.8651	1	FALSE	#N/A
Dnajc9	1	0.9	0.2052	0.8659	1	FALSE	6.6398
Rictor	0.7	0.8	-0.2181	0.8666	1	FALSE	#N/A
Larp4	27.4	25.9	0.0793	0.8678	1	FALSE	6.967
Fgfr1op	3.3	3	0.1424	0.8681	1	FALSE	8.3824
Zfr	13.1	12.1	0.1072	0.8692	1	FALSE	6.9385
Brd3	5.2	5.7	-0.1316	0.8694	1	FALSE	12.505
Uba1	5.8	6.3	-0.1112	0.8712	1	FALSE	11.602
Kdm3a	1.3	1.5	-0.1778	0.8725	1	FALSE	#N/A
Gpatch11	1.3	1.2	0.1791	0.8728	1	FALSE	#N/A
Fam192a	3.2	3.6	-0.1665	0.8747	1	FALSE	#N/A
Gapdhs	1.7	1.5	0.1687	0.8761	1	FALSE	6.7102
Ppil2	1.7	1.5	0.1687	0.8761	1	FALSE	7.7967
Rc3h1	1.6	1.8	-0.1653	0.8778	1	FALSE	6.9633
Zfp91	1.7	1.6	0.1568	0.8801	1	FALSE	7.7487
Kif16b	1.1	0.9	0.1795	0.882	1	FALSE	6.7839
Prdx2	1.3	1.2	0.1638	0.8826	1	FALSE	13.5813
Eef1g	5.3	5.8	-0.1152	0.8854	1	FALSE	13.2501
Hsph1	19.7	20.9	-0.08554	0.8859	1	FALSE	#N/A
Hspb8	4.8	5.6	-0.2232	0.8874	1	FALSE	9.8123
Cdk2	1.6	1.9	-0.1754	0.8897	1	FALSE	10.1684
Hspa4	4.2	4.7	-0.1522	0.8907	1	FALSE	8.1275
Osbpl3	1.1	1.2	-0.1593	0.8913	1	FALSE	8.8718
Ap3s1	0.7	0.6	0.1818	0.8931	1	FALSE	#N/A
Caap1	0.7	0.6	0.1818	0.8931	1	FALSE	#N/A
Cand1	0.7	0.6	0.1818	0.8931	1	FALSE	11.7541
Cenpe	0.7	0.6	0.1818	0.8931	1	FALSE	6.6764
Dhx36	0.7	0.6	0.1818	0.8931	1	FALSE	9.053
Farp1	0.7	0.6	0.1818	0.8931	1	FALSE	#N/A
Kpna3	0.7	0.6	0.1818	0.8931	1	FALSE	7.8278
Limd2	0.7	0.6	0.1818	0.8931	1	FALSE	8.0132
Psmd3	0.7	0.6	0.1818	0.8931	1	FALSE	6.8429
2011-09-01	0.7	0.6	0.1818	0.8931	1	FALSE	#N/A
Strip1	0.7	0.6	0.1818	0.8931	1	FALSE	#N/A
Tpp2	0.7	0.6	0.1818	0.8931	1	FALSE	8.9887
Zbtb1	0.7	0.6	0.1818	0.8931	1	FALSE	7.0304
Cep170b	4.6	4.1	0.1485	0.8935	1	FALSE	#N/A
Bin1	3.1	2.8	0.1474	0.8964	1	FALSE	10.4106
Gnao1	3.5	4	-0.1746	0.8966	1	FALSE	7.3952
Cdk4	5.6	5.2	0.1032	0.8967	1	FALSE	11.0206
Ckap5	21.7	23.5	-0.1145	0.8988	1	FALSE	9.7042
Mepce	2.5	2.7	-0.1197	0.8991	1	FALSE	7.714
Cbx3	5.9	5.4	0.1441	0.8993	1	FALSE	8.1143
Rpl13	17.7	16	0.1376	0.8994	1	FALSE	#N/A
Bysl	1.7	1.8	-0.1226	0.9005	1	FALSE	6.7532
Atp1a3	18.1	21	-0.2166	0.9007	1	FALSE	6.8012
Eif2a	18.1	19.1	-0.07738	0.9025	1	FALSE	11.1458
Krt79	21.6	20.4	0.0773	0.9052	1	FALSE	6.7247
Impact	6	5.7	0.08985	0.9063	1	FALSE	10.6711
Tex9	1	0.9	0.1405	0.9076	1	FALSE	9.496
Atp2a2	0.7	0.6	0.1549	0.9086	1	FALSE	10.8923
Rnf169	0.7	0.6	0.1549	0.9086	1	FALSE	#N/A
Usp47	3.6	3.9	-0.1233	0.9106	1	FALSE	11.4014
Btf3	1	0.9	0.135	0.9119	1	FALSE	13.3092
Pgd	1	0.9	0.135	0.9119	1	FALSE	12.8219
Ncoa2	1.4	1.6	-0.1272	0.9124	1	FALSE	7.0534
Ercc6l	4.5	4.2	0.1004	0.9142	1	FALSE	#N/A
Wwox	14.6	14.1	0.05212	0.9191	1	FALSE	8.3846
Rbm25	5.3	5.8	-0.1146	0.92	1	FALSE	#N/A
Drg2	2.2	2.4	-0.1021	0.9215	1	FALSE	9.3715
Nop16	1.4	1.6	-0.1113	0.9227	1	FALSE	#N/A
Rps3	8.2	8.8	-0.1047	0.9234	1	FALSE	13.1364
Wwtr1	0.7	0.6	0.1252	0.9267	1	FALSE	8.6685
Nrbf2	1.1	1.2	-0.1084	0.9268	1	FALSE	7.8098
Trmt6	1.1	1.2	-0.1084	0.9268	1	FALSE	8.6465
Ipo7	1.4	1.5	-0.08874	0.9335	1	FALSE	6.733
Poldip3	13.5	12.9	0.06319	0.9367	1	FALSE	11.3661
Ppp1r9b	3.8	3.9	-0.06425	0.9368	1	FALSE	8.0495
Rps6	14.6	15.4	-0.0729	0.9384	1	FALSE	11.0153
Camsap2	4.2	4	0.07036	0.9385	1	FALSE	#N/A
Rpl7	10.2	9.5	0.09999	0.9387	1	FALSE	#N/A
Sfswap	2.8	3	-0.07964	0.9389	1	FALSE	#N/A
Fkbp8	1.4	1.5	-0.07648	0.9445	1	FALSE	9.8308
Hnrnpk	52.5	53.8	-0.03641	0.9458	1	FALSE	7.2094
Clic1	9.6	9.4	0.0411	0.946	1	FALSE	8.8905
Kifc1	4.4	4.6	-0.04994	0.947	1	FALSE	8.9136
S100a4	3.8	3.9	-0.05242	0.9477	1	FALSE	6.9459
Nup88	6.4	6.2	0.05162	0.9482	1	FALSE	10.773
Copg1	4.7	4.8	-0.04381	0.9513	1	FALSE	6.6684
Rpl24	14.7	14.2	0.04854	0.9521	1	FALSE	9.6241
Polr3g	1	0.9	0.0712	0.9531	1	FALSE	7.4229
Prrc2b	28.6	29.2	-0.03032	0.9534	1	FALSE	#N/A
Jcad	7.3	7	0.05204	0.9562	1	FALSE	#N/A
Wrnip1	2.4	2.5	-0.05033	0.9578	1	FALSE	6.6566
Rpl17	10	10.5	-0.06725	0.9596	1	FALSE	6.7002
Sdpr	10.4	10.1	0.03686	0.9628	1	FALSE	6.8958
Gemin5	2.9	3	-0.04336	0.9646	1	FALSE	7.3221
Hnrnpu	22.4	22.8	-0.02088	0.9651	1	FALSE	#N/A
Pum2	1.4	1.5	-0.04714	0.9659	1	FALSE	7.4622
Magi1	2.1	2.1	0.03991	0.9699	1	FALSE	7.3067
Gigyf1	0.6	0.6	0.05061	0.9706	1	FALSE	8.1496
Zc3hav1	26.4	26.8	-0.02048	0.9714	1	FALSE	6.9737
Hp1bp3	17.1	17.4	-0.02298	0.9738	1	FALSE	12.5631
Gtpbp4	15.3	15.6	-0.02984	0.974	1	FALSE	12.0982
Dnm1	1.9	1.8	0.03664	0.9753	1	FALSE	6.6991
Hdgf	1.4	1.4	-0.03452	0.9755	1	FALSE	12.8767
Nars	2.4	2.3	0.02635	0.9783	1	FALSE	10.243
Krt33b	4.6	4.7	-0.02918	0.9785	1	FALSE	6.7391
Acly	10.4	10.2	0.02675	0.981	1	FALSE	13.0633
Hspa5	29.2	28.9	0.01481	0.9814	1	FALSE	7.1556
Brap	5.5	5.5	0.01709	0.9818	1	FALSE	7.2733
Hmgb1	2.7	2.7	0.01364	0.9872	1	FALSE	6.8623
Lig1	8.9	8.9	-0.006437	0.992	1	FALSE	11.3897
Cbx5	2.1	2.1	0.009517	0.9927	1	FALSE	10.1912
Mbnl2	2.1	2.1	0.009517	0.9927	1	FALSE	8.831
Plrg1	2.7	2.7	0.007787	0.9934	1	FALSE	13.1282
Atp1a2	18.7	18.6	0.0127	0.9941	1	FALSE	6.819
Mbnl1	1.8	1.8	-0.007202	0.9948	1	FALSE	7.9367
Rc3h2	2.1	2.1	0.0005888	0.9995	1	FALSE	7.7547
Abcc10	0	0	0	1	1	FALSE	7.5115
Abce1	0	0	0	1	1	FALSE	7.491
Abr	0	0	0	1	1	FALSE	8.2387
Acacb	0	0	0	1	1	FALSE	7.3097
Adsl	0	0	0	1	1	FALSE	9.2613
Ahcyl1	0	0	0	1	1	FALSE	8.786
Aimp1	0	0	0	1	1	FALSE	#N/A
Aimp2	0	0	0	1	1	FALSE	#N/A
Aldh18a1	0	0	0	1	1	FALSE	9.648
Aldh3a2	0	0	0	1	1	FALSE	8.5741
Aldh9a1	0	0	0	1	1	FALSE	6.6157
Alms1	0	0	0	1	1	FALSE	7.316
Ampd3	0	0	0	1	1	FALSE	6.7111
Ap2a2	0	0	0	1	1	FALSE	8.8193
Ap2b1	0	0	0	1	1	FALSE	8.9103
Ap3b1	0	0	0	1	1	FALSE	7.04
Arf3	0	0	0	1	1	FALSE	8.7281
Arfgef2	0	0	0	1	1	FALSE	7.6202
Arhgap12	0	0	0	1	1	FALSE	8.468
Arhgap17	0	0	0	1	1	FALSE	10.5016
Arl6ip5	0	0	0	1	1	FALSE	7.9788
Armc6	0	0	0	1	1	FALSE	9.3605
Arpc1b	0	0	0	1	1	FALSE	9.3094
Arpc2	0	0	0	1	1	FALSE	9.4289
Arvcf	0	0	0	1	1	FALSE	7.3017
Asap2	0	0	0	1	1	FALSE	#N/A
Ascc3	0	0	0	1	1	FALSE	7.6063
Aspscr1	0	0	0	1	1	FALSE	8.7194
Atad2	0	0	0	1	1	FALSE	6.7544
Atf7ip	0	0	0	1	1	FALSE	9.3604
Atl3	0	0	0	1	1	FALSE	7.6368
Bag2	0	0	0	1	1	FALSE	7.0956
Bcar1	0	0	0	1	1	FALSE	8.8588
Bloc1s2	0	0	0	1	1	FALSE	9.447
Bre	0	0	0	1	1	FALSE	8.436
Bub3	0	0	0	1	1	FALSE	9.7732
Cad	0	0	0	1	1	FALSE	9.6606
Camk1	0	0	0	1	1	FALSE	7.7995
Camk1d	0	0	0	1	1	FALSE	7.0038
Camk2g	0	0	0	1	1	FALSE	8.1818
Camlg	0	0	0	1	1	FALSE	#N/A
Cand2	0	0	0	1	1	FALSE	6.9425
Ccdc47	0	0	0	1	1	FALSE	8.5103
Ccdc6	0	0	0	1	1	FALSE	8.4624
Cdc23	0	0	0	1	1	FALSE	8.9937
Cdca2	0	0	0	1	1	FALSE	10.6232
Cdk7	0	0	0	1	1	FALSE	8.008
Cdk9	0	0	0	1	1	FALSE	8.0074
Cdkn1a	0	0	0	1	1	FALSE	7.6543
Celf1	0	0	0	1	1	FALSE	#N/A
Cep290	0	0	0	1	1	FALSE	#N/A
CF165	0	0	0	1	1	FALSE	#N/A
Cgnl1	0	0	0	1	1	FALSE	6.9319
Chd2	0	0	0	1	1	FALSE	8.5947
Chd5	0	0	0	1	1	FALSE	7.0448
Chd7	0	0	0	1	1	FALSE	10.2339
[truncated: 302 more rows]
