# Supplementary material for: TWIST1 and chromatin regulatory proteins interact to guide neural crest cell differentiation
Source: eLife. 2021 Feb 8;10:e62873. doi: 10.7554/eLife.62873 (PMC7968925; doi:10.7554/eLife.62873)
Supplement: Supplementary file 6. [file elife-62873-supp6.xlsx]

## Sheet: Imported data
Factor	Cell line	Alignment	Ref	Method		ID
TWIST1	NEC	hg38	This study	ChIP-seq for TWIST1 using anti-TWIST1 antibody (Abcam, ab50887)	This study	GSE130251
CHD8	NEC	hg38	Sugathan A, Biagioli M, Golzio C, Erdin S et al. CHD8 regulates neurodevelopmental pathways associated with autism spectrum disorder in neural progenitors. Proc Natl Acad Sci U S A 2014 Oct 21;111(42):E4468-77. PMID: 25294932	ChIP-seq for CHD8 using three different antibodies	Sugathan et al. 2014	GSE61487
CHD7	NEC	hg38	Sugathan A, Biagioli M, Golzio C, Erdin S et al. CHD8 regulates neurodevelopmental pathways associated with autism spectrum disorder in neural progenitors. Proc Natl Acad Sci U S A 2014 Oct 21;111(42):E4468-77. PMID: 25294932	ChIP-seq for CHD7 using CHD7 antibody (Bethyl A301-223A)	Sugathan et al. 2014	GSE61487
H3K4me	NEC	hg38	Ziller, M. J., Edri, R., Yaffe, Y., Donaghey, J., Pop, R., Mallard, W., Issner, R., Gifford, C. A., Goren, A., Xing, J., Gu, H., Cachiarelli, D., Tsankov, A., Epstein, C., Rinn, J. R., Mikkelsen, T. S., Kohlbacher, O., Gnirke, A., Bernstein, B. E., Elkabetz, Y. & Meissner, A. 2015. Dissecting neural differentiation regulatory networks through epigenetic footprinting. Nature, 518, 355-359.	ChIP-seq for histone mark H3K4me	Ziller et al., 2015	GSM1521738
H3K27ac	NEC	hg38		ChIP-seq for histone mark H3K27ac	Ziller et al., 2015	GSM1521755
H3K27me3	NEC	hg38		ChIP-seq for histone mark H3K27me3	Ziller et al., 2015	GSM1521736
H3K36me3	NEC	hg39	Du, Y., Liu, Z., Cao, X., Chen, X., Chen, Z., Zhang, X., Zhang, X. & Jiang, C. 2017. Nucleosome eviction along with H3K9ac deposition enhances Sox2 binding during human neuroectodermal commitment. Cell Death Differ, 24, 1121-1131.	ChIP-seq for histone mark H3K36me3	Du et al., 2017
H3K36me3	NEC	hg39	Chai, M., Sanosaka, T., Okuno, H., Zhou, Z., Koya, I., Banno, S., Andoh-Noda, T., Tabata, Y., Shimamura, R., Hayashi, T., Ebisawa, M., Sasagawa, Y., Nikaido, I., Okano, H. & Kohyama, J. 2018. Chromatin remodeler CHD7 regulates the stem cell identity of human neural progenitors. Genes & development, 32, 165-180.	ChIP-seq for histone mark H3K36me3	Chai et al., 2018	GSM2902410
PAX6	NEC	mm10	Hikichi, T., Matoba, R., Ikeda, T., Watanabe, A., Yamamoto, T., Yoshitake, S., Tamura-Nakano, M., Kimura, T., Kamon, M., Shimura, M., Kawakami, K., Okuda, A., Okochi, H., Inoue, T., Suzuki, A. & Masui, S. 2013. Transcription factors interfering with dedifferentiation induce cell type-specific transcriptional profiles. Proc Natl Acad Sci U S A, 110, 6412-7.	ChIP-seq for PAX6	Hikichi et al., 2013	GSM1012189
SOX2	NSC	mm10	Mistri, T. K., Devasia, A. G., Chu, L. T., Ng, W. P., Halbritter, F., Colby, D., Martynoga, B., Tomlinson, S. R., Chambers, I., Robson, P. & Wohland, T. 2015. Selective influence of Sox2 on POU transcription factor binding in embryonic and neural stem cells. EMBO Rep, 16, 1177-91.	ChIP-seq for SOX2	Mistri et al., 2015	GSM1711445
OLIG2	NSC	mm10	Kutejova, E., Sasai, N., Shah, A., Gouti, M. & Briscoe, J. 2016. Neural Progenitors Adopt Specific Identities by Directly Repressing All Alternative Progenitor Transcriptional Programs. Developmental cell, 36, 639-653.	ChIP-seq for OLIG2	Kutejova et al., 2016	ERS580651
