# Supplementary figures and images for: TWIST1 and chromatin regulatory proteins interact to guide neural crest cell differentiation
Source: eLife journal article supplement (doi:10.7554/elife.62873), 2021-02-08

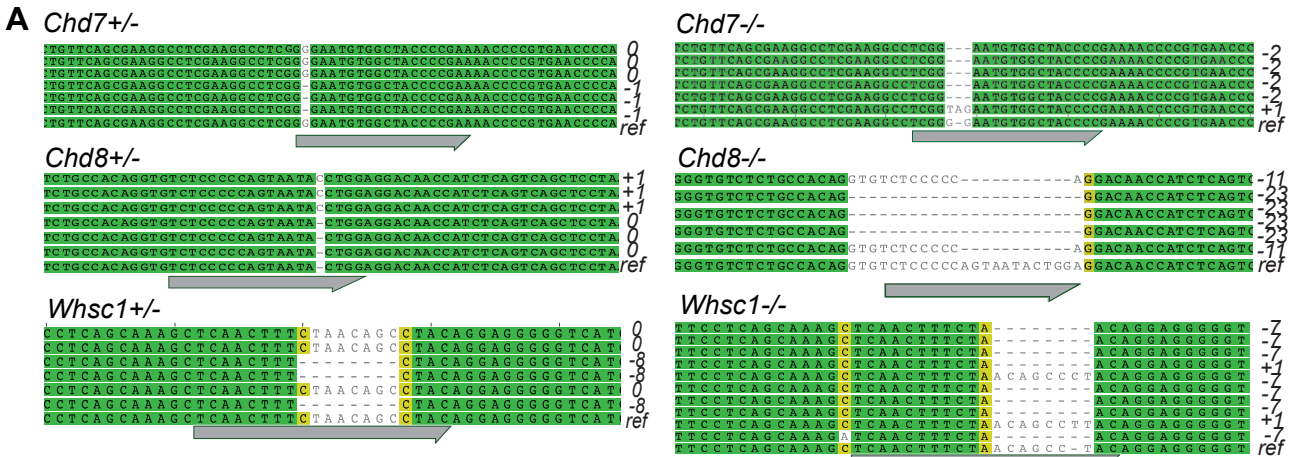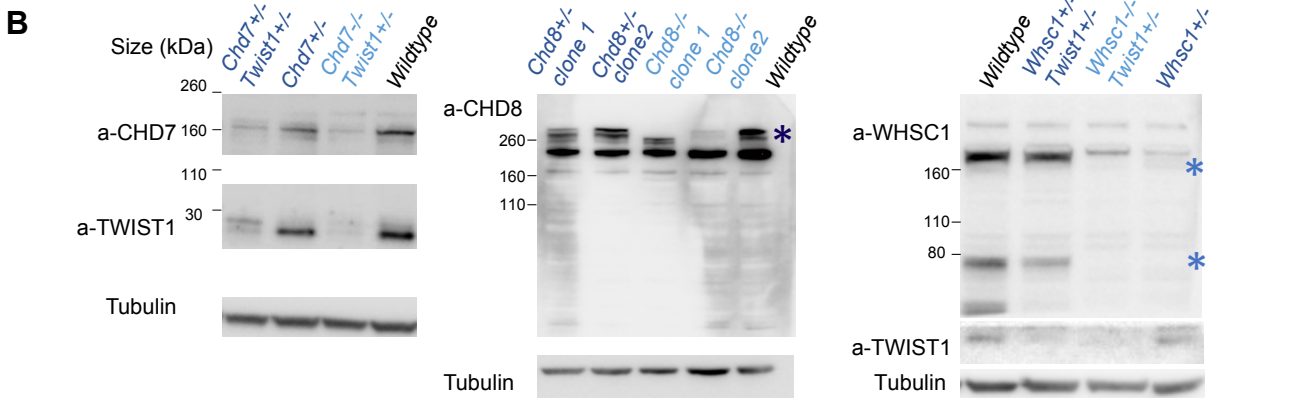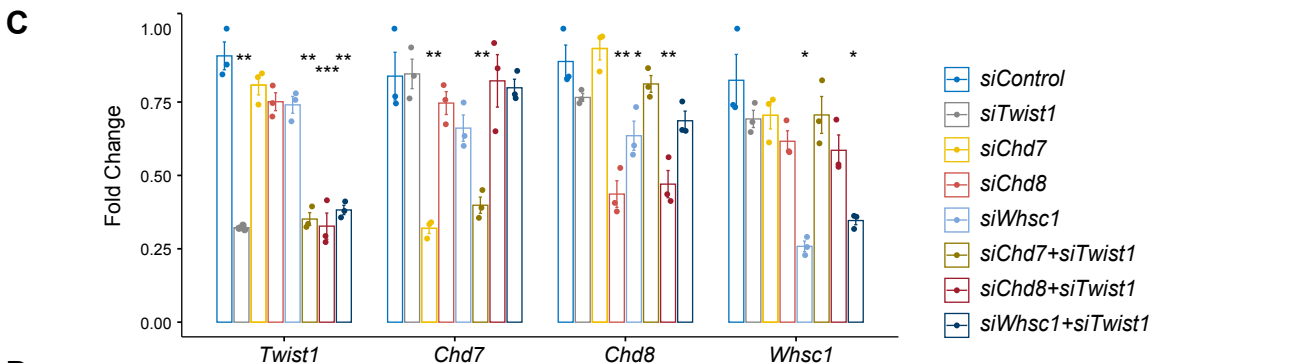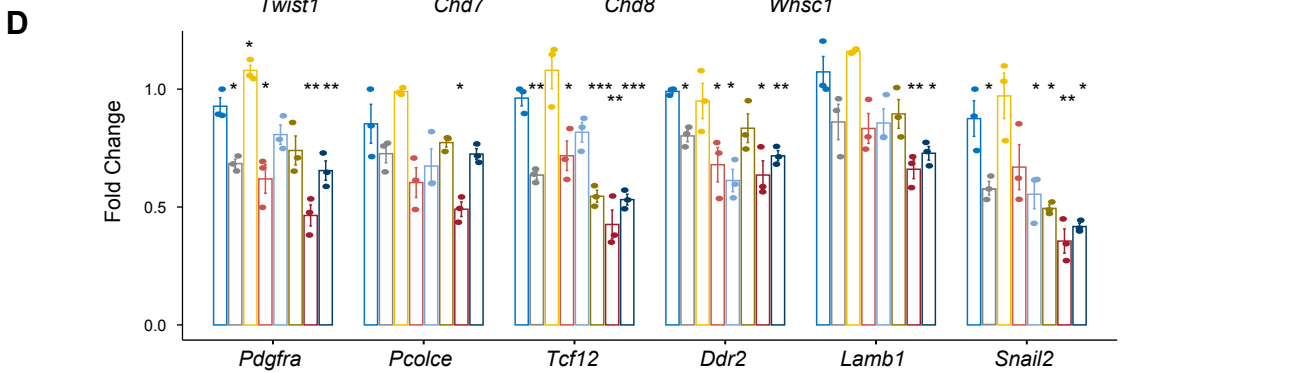

Supplement: supp [file elife_poa_e62873_Figure_3_figure_supplement_1.pdf › elife_poa_e62873_Figure_3_figure_supplement_1.pdf]

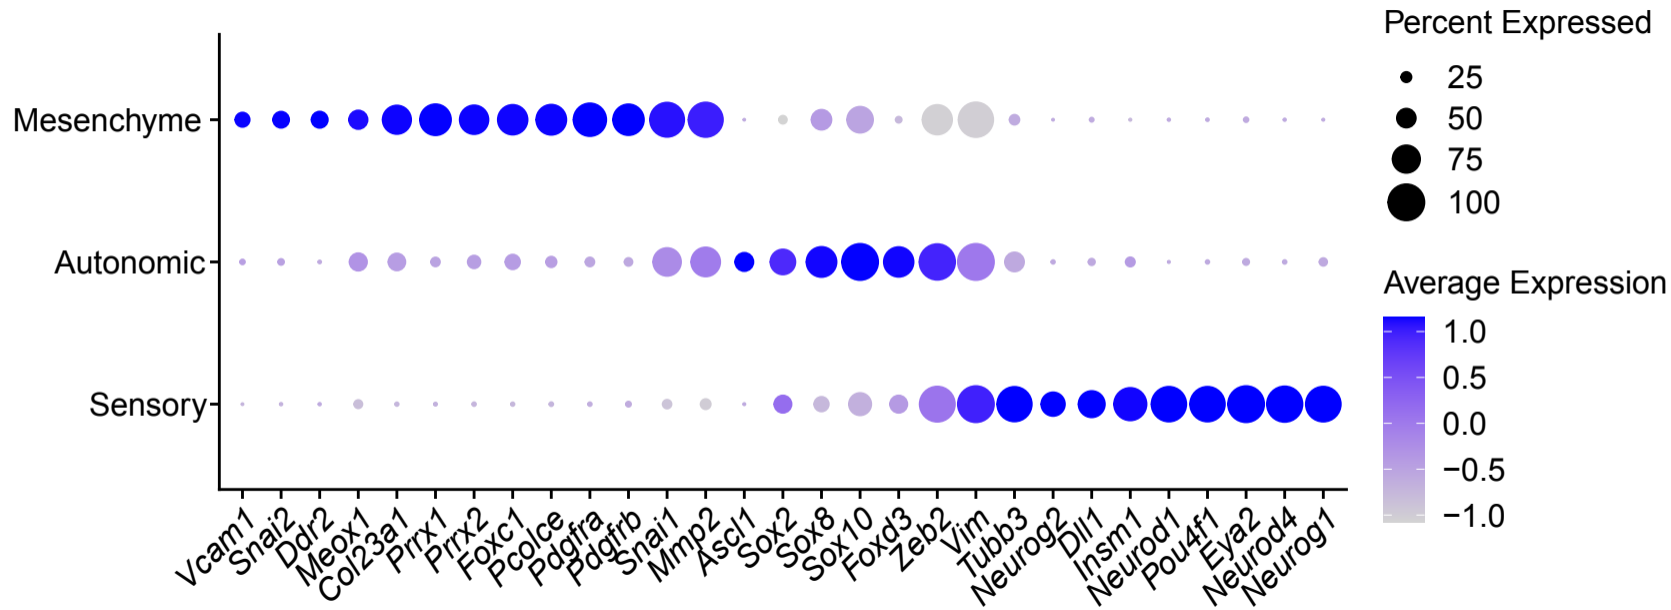

Supplement: supp [file elife_poa_e62873_Figure_3_figure_supplement_2.pdf › elife_poa_e62873_Figure_3_figure_supplement_2.pdf]

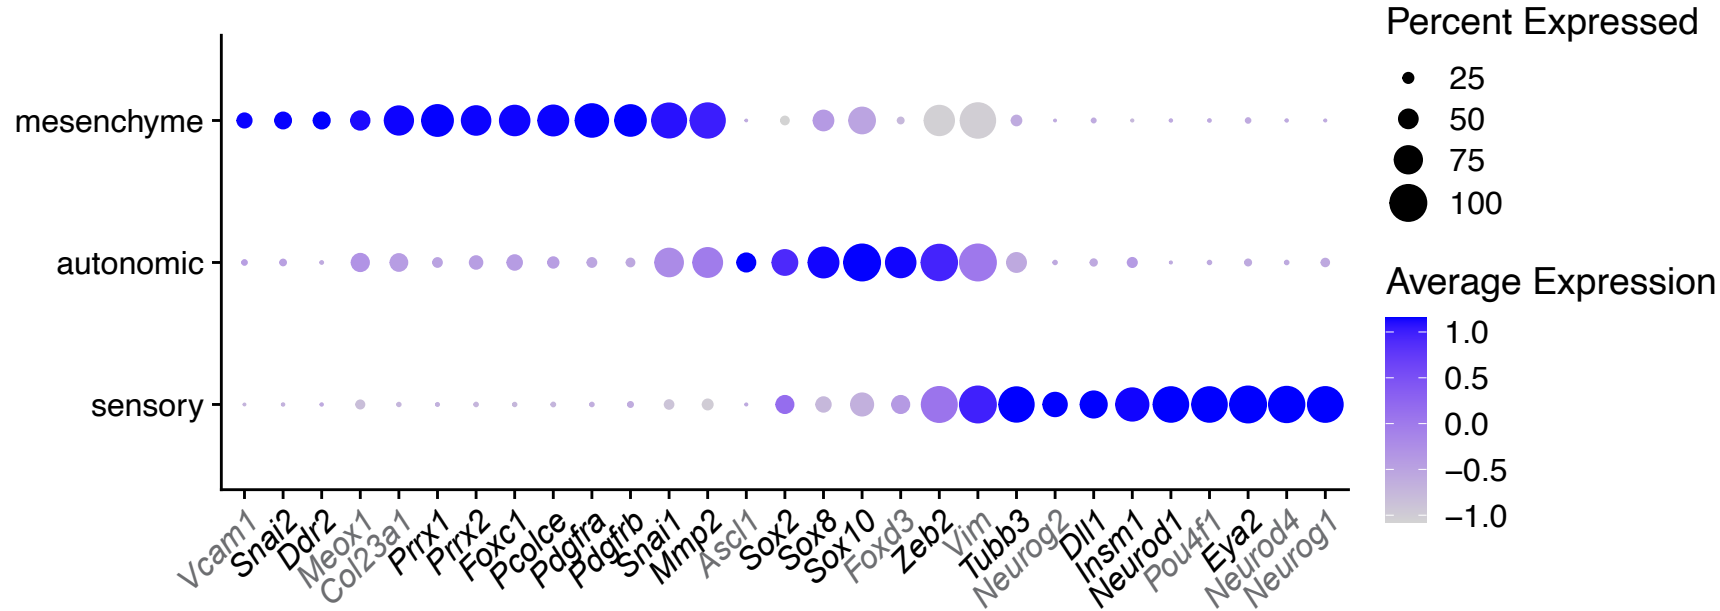

Supplement: supp [file elife_poa_e62873_Figure_6_figure_supplement_1.pdf › elife_poa_e62873_Figure_6_figure_supplement_1.pdf]

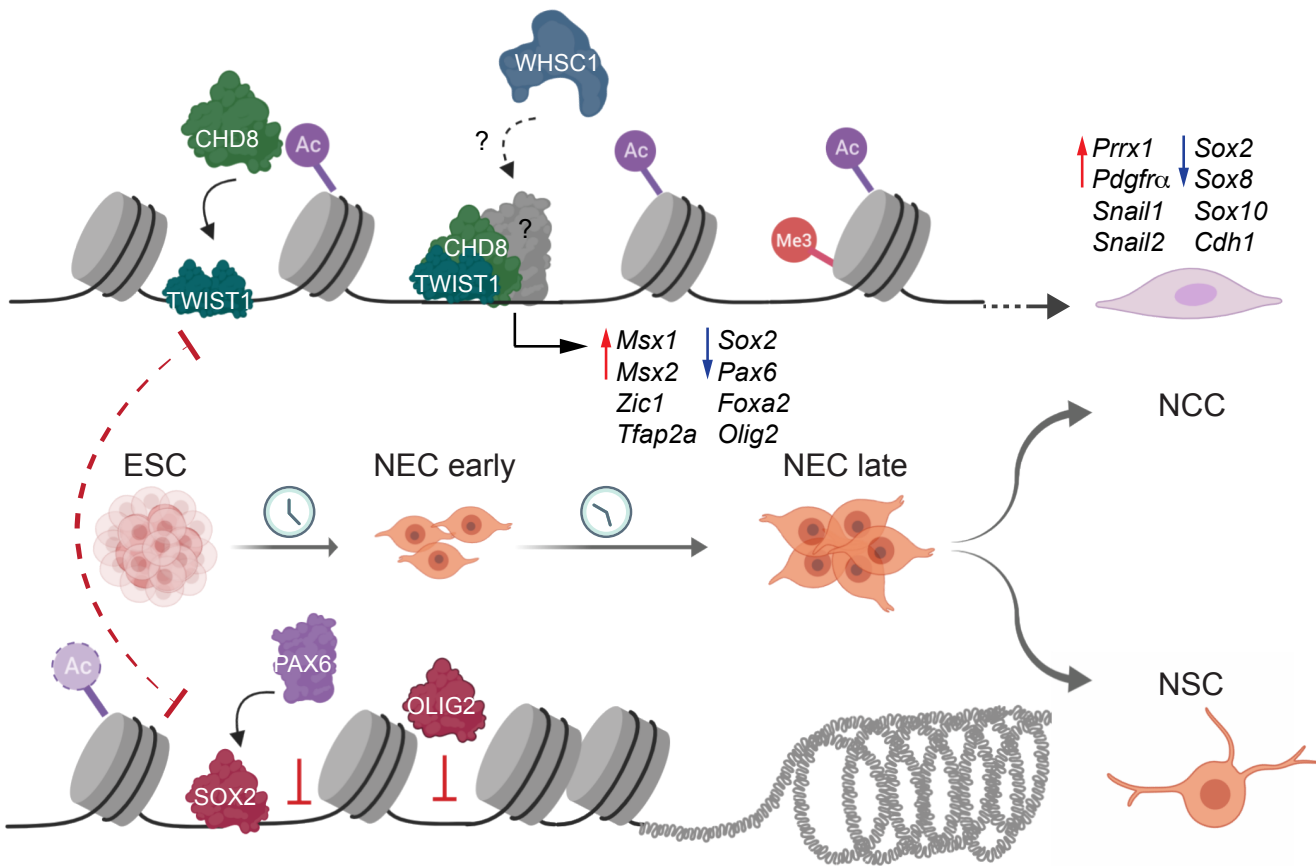

Supplement: supp [file elife_poa_e62873_Figure_7_figure_supplement_1.pdf › elife_poa_e62873_Figure_7_figure_supplement_1.pdf]
